# Supplementary material for: OsVIL2 Regulates Spikelet Development by Controlling Regulatory Genes in Oryza sativa
Source: Front Plant Sci. 2018 Feb 6;9:102. doi: 10.3389/fpls.2018.00102 (PMC5808121; doi:10.3389/fpls.2018.00102)
Supplement: TABLE S2 — Genes up-regulated in 2-mm young panicles of osvil2. [file Table_2.XLSX]

## Sheet: Table S2
AccID	Description	Blast_Symbol	Blast_Description	WT_2 mm	osvil2_2 mm	FoldChange	Log2FC	P-Value	FDR
LOC_Os04g33740	Similar to Cell wall invertase 2.	CWINV2	cell wall invertase 2 \\ cell wall invertase 2 (CWINV2); FUNCTIONS IN: hydrolase activity, hydrolyzing O-glycosyl compounds; INVOLVED IN: sucrose catabolic process, using beta-fructofuranosidase, carbohydrate metabolic process; LOCATED IN: endomembrane system; EXPRESSED IN: 9 plant structures; EXPRESSED DURING: L mature pollen stage, M germinated pollen stage, 4 anthesis, C globular stage, petal …	2828.53	5764.66	2.03804	1.02718	1.30613e-09	8.19407e-08
LOC_Os02g01520	IQ calmodulin-binding region domain containing protein.	BAG7	BCL-2-associated athanogene 7 \\ A member of Arabidopsis BAG (Bcl-2-associated athanogene) proteins, plant homologs of mammalian regulators of apoptosis. Plant BAG proteins are multi-functional and remarkably similar to their animal counterparts, as they regulate apoptotic-like processes ranging from pathogen attack, to abiotic stress, to plant development. Localized to the ER. Necessary for the …	644.49	1382.82	2.1456	1.10138	9.01627e-10	5.93165e-08
LOC_Os08g43390	Similar to Cytochrome P450 78A1 (EC 1.14.-.-) (CYPLXXVIII).	CYP78A9	cytochrome p450 78a9 \\ Encodes a cytochrome p450 monooxygenase. Overexpression of this gene allows fruit growth independently of fertilization. The gene is normally expressed only in floral organs(during the Arabidopsis stage 14 flower) and in the funiculus at anthesis. \\ cytochrome p450 78a9 (CYP78A9); FUNCTIONS IN: monooxygenase activity, oxygen binding; INVOLVED IN: fruit development; LOCATE…	291.177	1092.31	3.75135	1.90741	0.00593527	0.0400209
LOC_Os11g36160	Similar to Receptor kinase-like protein.	AT3G47570	Leucine-rich repeat protein kinase family protein \\ Leucine-rich repeat protein kinase family protein; FUNCTIONS IN: protein serine/threonine kinase activity, kinase activity, ATP binding; INVOLVED IN: transmembrane receptor protein tyrosine kinase signaling pathway, protein amino acid phosphorylation; LOCATED IN: plasma membrane; EXPRESSED IN: 13 plant structures; EXPRESSED DURING: 8 growth sta…	425.33	976.942	2.29691	1.19969	8.12423e-12	7.8454e-10
LOC_Os04g43840	Similar to Lysine decarboxylase-like protein.	LOG1	Putative lysine decarboxylase family protein \\ LONELY GUY 1 (LOG1); CONTAINS InterPro DOMAIN/s: Conserved hypothetical protein CHP00730 (InterPro:IPR005269); BEST Arabidopsis thaliana protein match is: lysine decarboxylase family protein (TAIR:AT2G37210.1); Has 5303 Blast hits to 5301 proteins in 1556 species: Archae - 26; Bacteria - 3660; Metazoa - 10; Fungi - 132; Plants - 396; Viruses - 0; Ot…	385.421	774.622	2.00981	1.00706	2.21881e-12	2.27251e-10
LOC_Os04g55800	Similar to Sulphate transporter protein.	AST91	sulfate transporter 91 \\ Encodes AST91 mRNA for sulfate transporter. \\ sulfate transporter 91 (AST91); FUNCTIONS IN: sulfate transmembrane transporter activity; INVOLVED IN: sulfate transport, transport, transmembrane transport; LOCATED IN: integral to membrane, membrane; EXPRESSED IN: 22 plant structures; EXPRESSED DURING: 13 growth stages; CONTAINS InterPro DOMAIN/s: Sulphate transporter (Int…	315.941	660.674	2.09113	1.06428	3.0318e-13	3.4157e-11
LOC_Os08g02354	Conserved hypothetical protein.	AT5G24740	Protein of unknown function (DUF1162) \\ INVOLVED IN: protein localization; EXPRESSED IN: 22 plant structures; EXPRESSED DURING: 13 growth stages; CONTAINS InterPro DOMAIN/s: Vacuolar protein sorting-associated protein (InterPro:IPR009543); BEST Arabidopsis thaliana protein match is: calcium-dependent lipid-binding family protein (TAIR:AT1G48090.1); Has 2219 Blast hits to 1322 proteins in 202 spe…	264.92	542.489	2.04775	1.03404	4.76858e-18	9.27608e-16
LOC_Os08g24880	Zinc finger, PHD-type domain containing protein.	EDM2	ENHANCED DOWNY MILDEW 2 \\ Encodes EDM2 (enhanced downy mildew 2). The predicted protein bears typical features of transcriptional regulators. EDM2 contains two putative bipartite nuclear localization signals (NLS) two zinc-finger-like motifs, a Proline-rich region and a large aspartic acid-rich region. Both zinc-finger-like stretches resemble the PHD (plant homeodomain) finger motif. Mutations i…	231.37	476.182	2.05809	1.04131	3.72444e-15	5.27252e-13
LOC_Os11g30210	Similar to NBS-LRR type resistance protein (Fragment).	AT3G14470	NB-ARC domain-containing disease resistance protein \\ NB-ARC domain-containing disease resistance protein; FUNCTIONS IN: protein binding; INVOLVED IN: apoptosis, defense response; LOCATED IN: endomembrane system; EXPRESSED IN: 23 plant structures; EXPRESSED DURING: 14 growth stages; CONTAINS InterPro DOMAIN/s: Leucine-rich repeat-containing protein (InterPro:IPR015766), NB-ARC (InterPro:IPR00218…	223.586	473.21	2.11646	1.08165	1.86985e-17	3.43938e-15
LOC_Os08g05320	Similar to Endoribonuclease Dicer homolog 3a.			211.934	466.109	2.19931	1.13705	2.40059e-18	4.88041e-16
LOC_Os01g08000	Ankyrin repeat containing protein.	AT3G04710	ankyrin repeat family protein \\ ankyrin repeat family protein; FUNCTIONS IN: binding; INVOLVED IN: biological_process unknown; LOCATED IN: cellular_component unknown; EXPRESSED IN: 22 plant structures; EXPRESSED DURING: 14 growth stages; CONTAINS InterPro DOMAIN/s: Tetratricopeptide-like helical (InterPro:IPR011990), Ankyrin repeat-containing domain (InterPro:IPR020683), Tetratricopeptide repeat…	186.15	405.405	2.17784	1.1229	1.4175e-16	2.38745e-14
LOC_Os11g01020	Non-protein coding transcript.	AT5G59950	RNA-binding (RRM/RBD/RNP motifs) family protein \\ RNA-binding (RRM/RBD/RNP motifs) family protein; FUNCTIONS IN: nucleotide binding, nucleic acid binding; INVOLVED IN: biological_process unknown; LOCATED IN: chloroplast; EXPRESSED IN: 25 plant structures; EXPRESSED DURING: 15 growth stages; CONTAINS InterPro DOMAIN/s: RNA recognition motif, RNP-1 (InterPro:IPR000504), Nucleotide-binding, alpha-b…	167.705	362.916	2.16401	1.11371	4.23867e-05	0.000788778
LOC_Os12g06080	DNA-binding pseudobarrel domain domain containing protein.	AT5G06250	AP2/B3-like transcriptional factor family protein \\ AP2/B3-like transcriptional factor family protein; CONTAINS InterPro DOMAIN/s: Transcriptional factor B3 (InterPro:IPR003340); BEST Arabidopsis thaliana protein match is: AP2/B3-like transcriptional factor family protein (TAIR:AT3G11580.1); Has 1353 Blast hits to 1351 proteins in 71 species: Archae - 0; Bacteria - 0; Metazoa - 0; Fungi - 0; Pla…	162.342	359.805	2.21634	1.14818	9.523e-16	1.47139e-13
LOC_Os12g34796	Conserved hypothetical protein.			132.202	296.309	2.24133	1.16436	2.07761e-14	2.67507e-12
LOC_Os11g29920	Hypothetical conserved gene.	AT3G14470	NB-ARC domain-containing disease resistance protein \\ NB-ARC domain-containing disease resistance protein; FUNCTIONS IN: protein binding; INVOLVED IN: apoptosis, defense response; LOCATED IN: endomembrane system; EXPRESSED IN: 23 plant structures; EXPRESSED DURING: 14 growth stages; CONTAINS InterPro DOMAIN/s: Leucine-rich repeat-containing protein (InterPro:IPR015766), NB-ARC (InterPro:IPR00218…	110.824	281.412	2.53927	1.34441	1.63375e-15	2.41393e-13
LOC_Os12g05310	Similar to HEAT repeat family protein, expressed.	AT2G26780	ARM repeat superfamily protein \\ ARM repeat superfamily protein; FUNCTIONS IN: binding; INVOLVED IN: biological_process unknown; LOCATED IN: membrane; EXPRESSED IN: 22 plant structures; EXPRESSED DURING: 13 growth stages; CONTAINS InterPro DOMAIN/s: Armadillo-like helical (InterPro:IPR011989), Armadillo-type fold (InterPro:IPR016024); Has 448 Blast hits to 380 proteins in 145 species: Archae - 0…	127.343	262.279	2.05963	1.04239	3.36746e-11	2.89568e-09
LOC_Os11g41365	Conserved hypothetical protein.			122.012	251.762	2.06343	1.04504	1.06662e-06	3.51283e-05
LOC_Os03g03760	Similar to Putataive InsB from Escherichia coli.	AT1G14590	Nucleotide-diphospho-sugar transferase family protein \\ Nucleotide-diphospho-sugar transferase family protein; CONTAINS InterPro DOMAIN/s: Nucleotide-diphospho-sugar transferase, predicted (InterPro:IPR005069); BEST Arabidopsis thaliana protein match is: Nucleotide-diphospho-sugar transferase family protein (TAIR:AT2G02061.1); Has 314 Blast hits to 308 proteins in 24 species: Archae - 0; Bacteri…	119.076	241.23	2.02584	1.01852	3.18518e-10	2.31517e-08
LOC_Os06g49000	Hypothetical conserved gene.	AT5G45540	Protein of unknown function (DUF594) \\ Protein of unknown function (DUF594); CONTAINS InterPro DOMAIN/s: Protein of unknown function DUF594 (InterPro:IPR007658); BEST Arabidopsis thaliana protein match is: Protein of unknown function (DUF594) (TAIR:AT5G45480.1); Has 1285 Blast hits to 857 proteins in 12 species: Archae - 0; Bacteria - 0; Metazoa - 0; Fungi - 0; Plants - 1285; Viruses - 0; Other …	103.034	214.13	2.07824	1.05536	1.27948e-09	8.0643e-08
LOC_Os08g05340	Conserved hypothetical protein.			82.6222	213.167	2.58002	1.36738	8.95539e-15	1.2047e-12
LOC_Os11g38360				77.2836	186.562	2.414	1.27142	5.77457e-10	3.99331e-08
LOC_Os12g17350		AT3G54823	transposable element gene \\ gypsy-like retrotransposon family, has a 4.4e-203 P-value blast match to GB:AAD22153 polyprotein (Gypsy_Ty3-element) (Sorghum bicolor)	53.4496	177.922	3.32879	1.735	1.42158e-16	2.38745e-14
LOC_Os04g44510	GRAM domain containing protein.	AT5G08350	GRAM domain-containing protein / ABA-responsive protein-related \\ GRAM domain-containing protein / ABA-responsive protein-related; CONTAINS InterPro DOMAIN/s: GRAM (InterPro:IPR004182); BEST Arabidopsis thaliana protein match is: GRAM domain-containing protein / ABA-responsive protein-related (TAIR:AT5G23370.1); Has 358 Blast hits to 358 proteins in 24 species: Archae - 0; Bacteria - 0; Metazoa …	72.418	176.541	2.4378	1.28558	0.00679888	0.0442855
LOC_Os06g19010	Conserved hypothetical protein.			62.7154	165.334	2.63626	1.39849	4.74127e-06	0.00012618
LOC_Os12g28250	Similar to NB-ARC domain containing protein, expressed.	AT3G46730	NB-ARC domain-containing disease resistance protein \\ NB-ARC domain-containing disease resistance protein; FUNCTIONS IN: ATP binding; INVOLVED IN: defense response, apoptosis; LOCATED IN: endomembrane system; CONTAINS InterPro DOMAIN/s: NB-ARC (InterPro:IPR002182), Disease resistance protein (InterPro:IPR000767); BEST Arabidopsis thaliana protein match is: NB-ARC domain-containing disease resist…	70.4925	158.153	2.24355	1.16578	9.80566e-06	0.000229865
LOC_Os08g36910	Alpha-amylase isozyme 3D precursor (EC 3.2.1.1) (1,4-alpha-D-glucan glucanohydrolase).	AMY1	alpha-amylase-like \\ Predicted to be secreted protein based on signalP prediction. Involved in starch mobilization. Mutants are defective in alpha-amylase activity. (Note: AMY1 has been found in the literature to be referred to as AMY3, which is not to be confused with AMY3/At1g69830). \\ alpha-amylase-like (AMY1); FUNCTIONS IN: alpha-amylase activity; INVOLVED IN: response to gibberellin stimul…	5.34359	146.207	27.3612	4.77406	0.0013056	0.0126712
LOC_Os09g39750	Protein of unknown function DUF966 family protein.	AT2G28150	Domain of unknown function (DUF966) \\ FUNCTIONS IN: molecular_function unknown; INVOLVED IN: biological_process unknown; LOCATED IN: plasma membrane; CONTAINS InterPro DOMAIN/s: Protein of unknown function DUF966 (InterPro:IPR010369), Uncharacterised conserved protein UCP031043 (InterPro:IPR021182); BEST Arabidopsis thaliana protein match is: Domain of unknown function (DUF966) (TAIR:AT5G59790.1…	65.1202	135.834	2.08589	1.06067	0.00126236	0.0123402
LOC_Os03g41920	Protein of unknown function DUF1618 domain containing protein.			45.1884	125.625	2.78002	1.4751	1.59795e-10	1.24158e-08
LOC_Os02g37480	Hypothetical conserved gene.			35.9713	115.391	3.20787	1.68162	0.00543546	0.0376362
LOC_Os06g12470	Hypothetical genes.			52.505	106.357	2.02565	1.01838	2.49289e-05	0.000503776
LOC_Os12g09220	Conserved hypothetical protein.			43.7458	102.335	2.3393	1.22608	9.0328e-07	3.03603e-05
LOC_Os05g03574	Conserved hypothetical protein.			46.163	98.3398	2.13027	1.09104	5.03033e-06	0.000133087
LOC_Os01g02520	Cytochrome P450 domain containing protein.	ATCG00350.1	Photosystem I, PsaA/PsaB protein \\ Encodes psaA protein comprising the reaction center for photosystem I along with psaB protein; hydrophobic protein encoded by the chloroplast genome. \\ PSAA; FUNCTIONS IN: chlorophyll binding; INVOLVED IN: photosynthesis; LOCATED IN: in 6 components; EXPRESSED IN: 24 plant structures; EXPRESSED DURING: 13 growth stages; CONTAINS InterPro DOMAIN/s: Photosystem …	46.6597	97.971	2.09969	1.07018	6.16081e-06	0.000157748
LOC_Os12g09300	Similar to Amino acid carrier (Fragment).	AAP8	amino acid permease 8 \\ Encodes a high affinity amino acid transporter that is probably responsible for import of organic nitrogen into developing seeds. One of eight gene family members that encode amino acid permeases. Most closely related to AAP1 (75%) identity. \\ amino acid permease 8 (AAP8); CONTAINS InterPro DOMAIN/s: Amino acid transporter, transmembrane (InterPro:IPR013057); BEST Arabid…	23.819	90.3233	3.79206	1.92298	3.3194e-06	9.35906e-05
LOC_Os07g36630	Similar to Cellulose synthase (Fragment).	CSLD3	cellulose synthase-like D3 \\ encodes a cellulose synthase like protein. mutations initiate root hairs that rupture at their tip soon after initiation. is required for the synthesis of a noncellulosic wall polysaccharide. \\ cellulose synthase-like D3 (CSLD3); FUNCTIONS IN: cellulose synthase activity, transferase activity, transferring glycosyl groups; INVOLVED IN: response to cyclopentenone, pl…	33.5316	88.9076	2.65146	1.40679	1.46854e-07	6.0931e-06
LOC_Os02g09240	Cytochrome P450 family protein.	CYP71B34	cytochrome P450, family 71, subfamily B, polypeptide 34 \\ putative cytochrome P450 \\ cytochrome P450, family 71, subfamily B, polypeptide 34 (CYP71B34); FUNCTIONS IN: electron carrier activity, monooxygenase activity, iron ion binding, oxygen binding, heme binding; INVOLVED IN: oxidation reduction; LOCATED IN: endomembrane system; EXPRESSED IN: 22 plant structures; EXPRESSED DURING: 13 growth s…	41.8041	88.5904	2.11918	1.08351	4.94529e-05	0.000904095
LOC_Os07g04400				34.9942	79.8218	2.281	1.18967	1.85767e-05	0.000392419
LOC_Os07g18154	Similar to Aldehyde oxidase 1 homolog (Fragment).	AAO2	aldehyde oxidase 2 \\ Encodes an aldehyde oxidase. AAO2 does not appear to act on abscisic aldehyde in vitro but it is possible that it may function in abscisic acid biosynthesis when the activity of At2g27150 (AAO3), the primary abscisic aldehyde oxidase, is lost. \\ aldehyde oxidase 2 (AAO2); FUNCTIONS IN: aldehyde oxidase activity; INVOLVED IN: oxidation reduction; EXPRESSED IN: 16 plant struc…	36.4542	78.4456	2.15189	1.10561	3.3706e-05	0.000650054
LOC_Os01g02510	Cytochrome P450 domain containing protein.	ATCG00350.1	Photosystem I, PsaA/PsaB protein \\ Encodes psaA protein comprising the reaction center for photosystem I along with psaB protein; hydrophobic protein encoded by the chloroplast genome. \\ PSAA; FUNCTIONS IN: chlorophyll binding; INVOLVED IN: photosynthesis; LOCATED IN: in 6 components; EXPRESSED IN: 24 plant structures; EXPRESSED DURING: 13 growth stages; CONTAINS InterPro DOMAIN/s: Photosystem …	37.4239	77.4987	2.07084	1.05021	8.27037e-05	0.0013881
LOC_Os05g02710		AT5G41980	CONTAINS InterPro DOMAIN/s: Putative harbinger transposase-derived nuclease (InterPro:IPR006912); BEST Arabidopsis thaliana protein match is: unknown protein (TAIR:AT1G43722.1); Has 1807 Blast hits to 1807 proteins in 277 species: Archae - 0; Bacteria - 0; Metazoa - 736; Fungi - 347; Plants - 385; Viruses - 0; Other Eukaryotes - 339 (source: NCBI BLink).	35.9725	77.4873	2.15407	1.10706	0.000300415	0.00395369
LOC_Os11g01480	Similar to Myb-like DNA-binding domain, SHAQKYF class family protein, expressed.	AT2G38300	myb-like HTH transcriptional regulator family protein \\ myb-like HTH transcriptional regulator family protein; CONTAINS InterPro DOMAIN/s: Homeodomain-like (InterPro:IPR009057), Myb, DNA-binding (InterPro:IPR014778), Myb-like DNA-binding domain, SHAQKYF class (InterPro:IPR006447), HTH transcriptional regulator, Myb-type, DNA-binding (InterPro:IPR017930), Homeodomain-related (InterPro:IPR012287);…	33.0524	75.8572	2.29506	1.19853	2.78352e-05	0.000552596
LOC_Os01g02530	Cytochrome P450 domain containing protein.	ATCG00350.1	Photosystem I, PsaA/PsaB protein \\ Encodes psaA protein comprising the reaction center for photosystem I along with psaB protein; hydrophobic protein encoded by the chloroplast genome. \\ PSAA; FUNCTIONS IN: chlorophyll binding; INVOLVED IN: photosynthesis; LOCATED IN: in 6 components; EXPRESSED IN: 24 plant structures; EXPRESSED DURING: 13 growth stages; CONTAINS InterPro DOMAIN/s: Photosystem …	35.4821	75.7872	2.13593	1.09486	0.000139647	0.00213329
LOC_Os01g34900	Similar to predicted protein.	GSL11	glucan synthase-like 11 \\ encodes a protein similar to callose synthase \\ glucan synthase-like 11 (GSL11); FUNCTIONS IN: transferase activity, transferring glycosyl groups, 1,3-beta-glucan synthase activity; INVOLVED IN: 1,3-beta-glucan biosynthetic process; LOCATED IN: 1,3-beta-glucan synthase complex, membrane; EXPRESSED IN: 22 plant structures; EXPRESSED DURING: 13 growth stages; CONTAINS In…	32.5757	68.4017	2.09978	1.07024	0.000125707	0.00195682
LOC_Os04g33310	Similar to OSIGBa0142C11.2 protein.	AT2G27830	unknown protein; BEST Arabidopsis thaliana protein match is: unknown protein (TAIR:AT4G22758.1); Has 131 Blast hits to 131 proteins in 17 species: Archae - 0; Bacteria - 0; Metazoa - 0; Fungi - 0; Plants - 131; Viruses - 0; Other Eukaryotes - 0 (source: NCBI BLink).	30.1235	68.3713	2.2697	1.1825	0.000186431	0.0026793
LOC_Os07g05120				30.6264	65.3036	2.13226	1.09239	0.00101947	0.0104414
LOC_Os12g01490	Similar to Phosphate starvation regulator protein (Regulatory protein of P- starvation acclimation response Psr1).	AT2G38300	myb-like HTH transcriptional regulator family protein \\ myb-like HTH transcriptional regulator family protein; CONTAINS InterPro DOMAIN/s: Homeodomain-like (InterPro:IPR009057), Myb, DNA-binding (InterPro:IPR014778), Myb-like DNA-binding domain, SHAQKYF class (InterPro:IPR006447), HTH transcriptional regulator, Myb-type, DNA-binding (InterPro:IPR017930), Homeodomain-related (InterPro:IPR012287);…	30.1398	62.6618	2.07904	1.05592	0.000169631	0.00247526
LOC_Os10g38160	Glutathione S-transferase GSTU6, putative, expressed	ERD9	Glutathione S-transferase family protein \\ EARLY-RESPONSIVE TO DEHYDRATION 9 (ERD9); FUNCTIONS IN: glutathione transferase activity; INVOLVED IN: response to water deprivation, response to karrikin, toxin catabolic process; LOCATED IN: chloroplast, cytoplasm; EXPRESSED IN: 21 plant structures; EXPRESSED DURING: 14 growth stages; CONTAINS InterPro DOMAIN/s: Thioredoxin fold (InterPro:IPR012335), …	29.1764	60.6273	2.07796	1.05517	0.000525496	0.00621018
LOC_Os09g08580	Conserved hypothetical protein.			25.2766	60.2917	2.38527	1.25416	8.33392e-05	0.00139728
LOC_Os08g32920	Dynamin family protein.	DL3	dynamin-like 3 \\ A high molecular weight GTPase whose GTP-binding domain shows a low homology to those of other plant dynamin-like proteins.Contains a pleckstrin homologous domain. DRP2B and DRP1A participate together in clathrin-coated vesicle formation during endocytosis. \\ dynamin-like 3 (DL3); FUNCTIONS IN: protein binding, clathrin binding, GTPase activity; INVOLVED IN: synaptic vesicle en…	24.3032	55.5346	2.28507	1.19224	0.000362011	0.00460414
LOC_Os08g13650				26.24	52.5436	2.00242	1.00175	0.00220233	0.0189224
LOC_Os09g01700	Conserved hypothetical protein.	AT3G18310	unknown protein; Has 30 Blast hits to 30 proteins in 10 species: Archae - 0; Bacteria - 0; Metazoa - 0; Fungi - 0; Plants - 30; Viruses - 0; Other Eukaryotes - 0 (source: NCBI BLink).	13.6086	47.4476	3.4866	1.80182	3.47824e-06	9.67572e-05
LOC_Os01g73980	Similar to Cysteine proteinase.	XCP2	xylem cysteine peptidase 2 \\ xylem cysteine peptidase 2 (XCP2); FUNCTIONS IN: cysteine-type peptidase activity, peptidase activity; INVOLVED IN: proteolysis, developmental programmed cell death; LOCATED IN: cell wall; EXPRESSED IN: 23 plant structures; EXPRESSED DURING: 13 growth stages; CONTAINS InterPro DOMAIN/s: Peptidase C1A, papain (InterPro:IPR013128), Proteinase inhibitor I29, cathepsin p…	17.4983	46.4854	2.65656	1.40956	8.65759e-05	0.00144146
LOC_Os10g32980	Similar to Cellulose synthase (Fragment).	CESA4	cellulose synthase A4 \\ Encodes a cellulose synthase involved in secondary cell wall biosynthesis. Confers resistance towards bacterial and fungal pathogens, independent of salicylic acid, ethylene and jasmonate signaling. \\ cellulose synthase A4 (CESA4); FUNCTIONS IN: cellulose synthase activity, transferase activity, transferring glycosyl groups; INVOLVED IN: cellulose biosynthetic process, p…	22.8519	46.1558	2.01978	1.0142	0.0023302	0.0198048
LOC_Os12g44030	Similar to Purple acid phosphatase.	PAP10	purple acid phosphatase 10 \\ purple acid phosphatase 10 (PAP10); FUNCTIONS IN: protein serine/threonine phosphatase activity, acid phosphatase activity; INVOLVED IN: biological_process unknown; LOCATED IN: cell wall, plant-type cell wall; EXPRESSED IN: 25 plant structures; EXPRESSED DURING: 15 growth stages; CONTAINS InterPro DOMAIN/s: Purple acid phosphatase, N-terminal (InterPro:IPR015914), Me…	20.9014	45.7734	2.18997	1.13091	0.00231593	0.0196982
LOC_Os01g04640	Reticulon family protein.	AT3G18260	Reticulon family protein \\ Reticulon family protein; FUNCTIONS IN: molecular_function unknown; INVOLVED IN: biological_process unknown; LOCATED IN: endoplasmic reticulum; EXPRESSED IN: 13 plant structures; EXPRESSED DURING: LP.06 six leaves visible, LP.04 four leaves visible, 4 anthesis, petal differentiation and expansion stage, LP.12 twelve leaves visible; CONTAINS InterPro DOMAIN/s: Reticulon…	21.3868	44.0954	2.0618	1.0439	0.00325425	0.0254384
LOC_Os01g08220	GA 3 beta-hydroxylase2, GA metabolism	GA3OX1	gibberellin 3-oxidase 1 \\ Involved in later steps of the gibberellic acid biosynthetic pathway. Activated by AGAMOUS in a cal-1, ap1-1 background. Deletion of 208 bp from -1016 to -809 (&#916;-808) resulted in loss of GA-negative feedback (this sequence, which contains a 43-bp sequence GNFEI, was shown to be sufficient for GA-negative feedback). \\ gibberellin 3-oxidase 1 (GA3OX1); CONTAINS Inte…	11.1751	43.4298	3.88629	1.95839	1.17253e-06	3.829e-05
LOC_Os11g34090	Protein of unknown function DUF247, plant domain containing protein.	AT3G50170	Plant protein of unknown function (DUF247) \\ Plant protein of unknown function (DUF247); CONTAINS InterPro DOMAIN/s: Protein of unknown function DUF247, plant (InterPro:IPR004158); BEST Arabidopsis thaliana protein match is: Plant protein of unknown function (DUF247) (TAIR:AT3G50120.1); Has 1185 Blast hits to 1045 proteins in 18 species: Archae - 0; Bacteria - 0; Metazoa - 0; Fungi - 0; Plants -…	18.9621	42.4147	2.23681	1.16144	0.00193259	0.0171091
LOC_Os06g04920	Similar to RNA-binding protein EWS.	AT3G15680	Ran BP2/NZF zinc finger-like superfamily protein \\ Ran BP2/NZF zinc finger-like superfamily protein; FUNCTIONS IN: binding, zinc ion binding; INVOLVED IN: biological_process unknown; LOCATED IN: intracellular; EXPRESSED IN: 21 plant structures; EXPRESSED DURING: 13 growth stages; CONTAINS InterPro DOMAIN/s: Zinc finger, RanBP2-type (InterPro:IPR001876); BEST Arabidopsis thaliana protein match is…	12.6364	41.7704	3.30556	1.72489	2.34717e-05	0.000477182
LOC_Os02g24700	Similar to Auxin-induced SAUR-like protein.	AT1G75580	SAUR-like auxin-responsive protein family \\ SAUR-like auxin-responsive protein family ; CONTAINS InterPro DOMAIN/s: Auxin responsive SAUR protein (InterPro:IPR003676); BEST Arabidopsis thaliana protein match is: SAUR-like auxin-responsive protein family (TAIR:AT1G19830.1); Has 1403 Blast hits to 1386 proteins in 27 species: Archae - 0; Bacteria - 0; Metazoa - 0; Fungi - 0; Plants - 1402; Viruses…	14.5757	41.06	2.81701	1.49417	0.000746798	0.00816525
LOC_Os01g10030	Hypothetical protein.			16.5262	40.4267	2.44622	1.29055	0.000758254	0.00827044
LOC_Os12g03840	Retrotransposon protein, putative, Ty1-copia subclass	AT3G60565	transposable element gene \\ copia-like retrotransposon family, has a 7.6e-249 P-value blast match to dbj|BAA78425.1| polyprotein (Arabidopsis thaliana) (AtRE1) (Ty1_Copia-element)	13.1231	40.1087	3.05634	1.6118	0.000199377	0.00282841
LOC_Os01g49600	Cytochrome P450 domain containing protein.	ATCG00350.1	Photosystem I, PsaA/PsaB protein \\ Encodes psaA protein comprising the reaction center for photosystem I along with psaB protein; hydrophobic protein encoded by the chloroplast genome. \\ PSAA; FUNCTIONS IN: chlorophyll binding; INVOLVED IN: photosynthesis; LOCATED IN: in 6 components; EXPRESSED IN: 24 plant structures; EXPRESSED DURING: 13 growth stages; CONTAINS InterPro DOMAIN/s: Photosystem …	18.9621	38.0604	2.00718	1.00517	0.00689391	0.0447335
LOC_Os02g46860	Similar to oligopeptide transporter 4.	OPT4	oligopeptide transporter 4 \\ oligopeptide transporter \\ oligopeptide transporter 4 (OPT4); CONTAINS InterPro DOMAIN/s: Tetrapeptide transporter, OPT1/isp4 (InterPro:IPR004648), Oligopeptide transporter OPT superfamily (InterPro:IPR004813); BEST Arabidopsis thaliana protein match is: oligopeptide transporter 2 (TAIR:AT1G09930.1); Has 1807 Blast hits to 1807 proteins in 277 species: Archae - 0; B…	15.5578	37.3569	2.40117	1.26374	0.00107262	0.0108583
LOC_Os12g16620	Os12g0267000	AT1G64410	transposable element gene \\ similar to unknown protein [Arabidopsis thaliana] (TAIR:AT1G52960.1); similar to helicase-related [Arabidopsis thaliana] (TAIR:AT3G43350.1); similar to AT hook motif-containing protein-related [Arabidopsis thaliana] (TAIR:AT3G42100.1); similar to hypothetical protein 31.t00030 [Brassica oleracea] (GB:ABD65117.1); contains InterPro domain Nucleic acid-binding, OB-fold,…	5.83402	36.065	6.18183	2.62803	3.61629e-06	9.99804e-05
LOC_Os11g43980	Similar to Peroxidase (EC 1.11.1.7).	RCI3	Peroxidase superfamily protein \\ Encodes a cold-inducible cationic peroxidase that is involved in the stress response. In response to low temperature, RCI3 transcripts accumulate in the aerial part and in roots of etiolated seedlings but only in roots of light-grown seedlings. \\ RARE COLD INDUCIBLE GENE 3 (RCI3); FUNCTIONS IN: peroxidase activity; INVOLVED IN: response to desiccation, response …	16.5262	35.7007	2.16025	1.1112	0.00423462	0.0312159
LOC_Os05g40010	Similar to nonspecific lipid-transfer protein.	AT5G01870	Bifunctional inhibitor/lipid-transfer protein/seed storage 2S albumin superfamily protein \\ Predicted to encode a PR (pathogenesis-related) protein. Belongs to the lipid transfer protein (PR-14) family with the following members: At2g38540/LTP1, At2g38530/LTP2, At5g59320/LTP3, At5g59310/LTP4, At3g51600/LTP5, At3g08770/LTP6, At2g15050/LTP7, At2g18370/LTP8, At2g15325/LTP9, At5g01870/LTP10, At4g333…	13.1194	35.3716	2.69613	1.43089	0.00061088	0.00699897
LOC_Os07g22380				16.0408	35.3327	2.20268	1.13926	0.00477456	0.0340542
LOC_Os04g41970	Cellulase precursor (Cellulase homolog OR16pep) (Endo-1,4-beta-D- glucanase KORRIGAN) (EC 3.2.1.4).	KOR2	Six-hairpin glycosidases superfamily protein \\ KORRIGAN 2 (KOR2); FUNCTIONS IN: hydrolase activity, hydrolyzing O-glycosyl compounds, catalytic activity; INVOLVED IN: carbohydrate metabolic process; LOCATED IN: cellular_component unknown; EXPRESSED IN: stem, sepal, root, leaf, stamen; EXPRESSED DURING: LP.06 six leaves visible, 4 anthesis, petal differentiation and expansion stage, LP.08 eight l…	15.0661	35.0278	2.32493	1.21719	0.00265622	0.0218303
LOC_Os12g17800				15.5628	34.3236	2.20549	1.1411	0.00470305	0.0336816
LOC_Os12g22600	Aminoacyl-tRNA synthetase, class II (D, K and N)-like domain containing protein.	NS2	asparaginyl-tRNA synthetase 2 \\ Encodes an asparaginyl-tRNA synthetase. \\ asparaginyl-tRNA synthetase 2 (NS2); CONTAINS InterPro DOMAIN/s: Aminoacyl-tRNA synthetase, class II (D/K/N) (InterPro:IPR004364), Aminoacyl-tRNA synthetase, class II (D/K/N)-like (InterPro:IPR018150); BEST Arabidopsis thaliana protein match is: Class II aminoacyl-tRNA and biotin synthetases superfamily protein (TAIR:AT5G…	13.6136	34.0209	2.49905	1.32138	0.00162645	0.01503
LOC_Os10g11860	Multi antimicrobial extrusion protein MatE family protein.	AT3G26590	MATE efflux family protein \\ MATE efflux family protein; FUNCTIONS IN: antiporter activity, drug transmembrane transporter activity, transporter activity; INVOLVED IN: drug transmembrane transport, transmembrane transport; LOCATED IN: plasma membrane, vacuole, membrane; EXPRESSED IN: 22 plant structures; EXPRESSED DURING: 13 growth stages; CONTAINS InterPro DOMAIN/s: Multi antimicrobial extrusio…	13.6123	33.3614	2.45082	1.29327	0.00500435	0.0353574
LOC_Os05g38420	Similar to Laccase (EC 1.10.3.2).	LAC17	laccase 17 \\ putative laccase, a member of laccase family of genes (17 members in Arabidopsis). \\ laccase 17 (LAC17); FUNCTIONS IN: laccase activity; INVOLVED IN: oxidation reduction, lignin catabolic process; LOCATED IN: endomembrane system, apoplast; EXPRESSED IN: 14 plant structures; EXPRESSED DURING: LP.04 four leaves visible, 4 anthesis, C globular stage, petal differentiation and expansio…	11.1826	33.0152	2.95237	1.56188	0.000408478	0.00508042
LOC_Os06g30110		AT4G06604	transposable element gene \\ gypsy-like retrotransposon family, has a 1.4e-248 P-value blast match to GB:AAD19359 polyprotein (gypsy_Ty3-element) (Sorghum bicolor)	11.6718	32.6454	2.79695	1.48385	0.00343579	0.0264749
LOC_Os07g02930				13.6136	32.3201	2.37411	1.24739	0.00275194	0.0223587
LOC_Os01g22190	Cytochrome P450 domain containing protein.	ATCG00350.1	Photosystem I, PsaA/PsaB protein \\ Encodes psaA protein comprising the reaction center for photosystem I along with psaB protein; hydrophobic protein encoded by the chloroplast genome. \\ PSAA; FUNCTIONS IN: chlorophyll binding; INVOLVED IN: photosynthesis; LOCATED IN: in 6 components; EXPRESSED IN: 24 plant structures; EXPRESSED DURING: 13 growth stages; CONTAINS InterPro DOMAIN/s: Photosystem …	8.26497	31.6481	3.82919	1.93704	0.000183986	0.00264925
LOC_Os07g36570	Similar to Receptor-like protein kinase 6.	B120	S-locus lectin protein kinase family protein \\ B120; FUNCTIONS IN: protein serine/threonine kinase activity, sugar binding, protein kinase activity, ATP binding; INVOLVED IN: protein amino acid phosphorylation, recognition of pollen; LOCATED IN: plasma membrane; EXPRESSED IN: 13 plant structures; EXPRESSED DURING: 8 growth stages; CONTAINS InterPro DOMAIN/s: Curculin-like (mannose-binding) lecti…	13.1244	30.614	2.33261	1.22194	0.00553924	0.0381373
LOC_Os04g37990	Similar to Monosaccharide transporter 1.	AT1G34580	Major facilitator superfamily protein \\ Major facilitator superfamily protein; FUNCTIONS IN: carbohydrate transmembrane transporter activity, sugar:hydrogen symporter activity; INVOLVED IN: transport, transmembrane transport; LOCATED IN: integral to membrane, membrane; EXPRESSED IN: 12 plant structures; EXPRESSED DURING: 7 growth stages; CONTAINS InterPro DOMAIN/s: Sugar transporter, conserved s…	12.6352	29.9692	2.37188	1.24603	0.00586275	0.0396506
LOC_Os05g05630		AT4G03810	transposable element gene \\ copia-like retrotransposon family, has a 0. P-value blast match to GB:BAA22288 pol polyprotein (Ty1_Copia-element) (Oryza australiensis)GB:BAA22288 polyprotein (Ty1_Copia-element) (Oryza australiensis)gi|2443320|dbj|BAA22288.1| polyprotein (RIRE1) (Oryza australiensis) (Ty1_Copia-element)	11.1776	27.6386	2.47267	1.30607	0.00570373	0.0390241
LOC_Os03g05400	Retrotransposon protein, putative, unclassified	AT1G58020	transposable element gene \\ non-LTR retrotransposon family (LINE), has a 3.7e-49 P-value blast match to GB:NP_038603 L1 repeat, Tf subfamily, member 23 (LINE-element) (Mus musculus)	10.208	27.6044	2.70419	1.4352	0.0065931	0.0432696
LOC_Os09g30320	Similar to Anther-specific protein.			2.43095	25.6132	10.5363	3.39729	0.00438293	0.0320057
LOC_Os07g39060				7.2891	25.5536	3.50573	1.80972	0.00109794	0.0110362
LOC_Os02g58214	Hypothetical gene.			10.208	25.2621	2.47474	1.30727	0.00646267	0.0426594
LOC_Os12g16630	Putative uncharacterized protein	AT5G37110	transposable element gene \\ similar to unknown protein [Arabidopsis thaliana] (TAIR:AT3G13250.1); similar to unknown protein [Arabidopsis thaliana] (TAIR:AT2G05080.1); similar to AT hook motif-containing protein-related [Arabidopsis thaliana] (TAIR:AT3G42100.1); similar to hypothetical protein 27.t00039 [Brassica oleracea] (GB:ABD65060.1); similar to hypothetical protein 31.t00030 [Brassica oler…	4.86439	24.9201	5.12297	2.35698	0.00164205	0.0151173
LOC_Os11g23080				7.29159	24.2518	3.32599	1.73379	0.00169602	0.015498
LOC_Os10g20780		AT5G32215	transposable element gene \\ gypsy-like retrotransposon family (Athila), has a 4.6e-306 P-value blast match to GB:CAA57397 Athila ORF 1 (Arabidopsis thaliana)	6.32071	23.8939	3.78025	1.91848	0.00113492	0.0113362
LOC_Os06g19540	Similar to H0207B04.1 protein.	KCR1	beta-ketoacyl reductase 1 \\ Encodes one of the two Arabidopsis homologues to YBR159w encoding a S. cerevisiae beta-ketoacyl reductase (KCR), which catalyzes the first reduction during VLCFA (very long chain fatty acids, >18 carbon) elongation: KCR1 (At1g67730), KCR2 (At1g24470). Complementation of the yeast ybr159Delta mutant demonstrated that the two KCR proteins are divergent and that only AtK…	7.2866	23.8783	3.27701	1.71238	0.00166472	0.0152613
LOC_Os08g10310	Protein kinase, core domain containing protein.	AT1G56130	Leucine-rich repeat transmembrane protein kinase \\ Leucine-rich repeat transmembrane protein kinase; FUNCTIONS IN: protein serine/threonine kinase activity, protein kinase activity, ATP binding; INVOLVED IN: protein amino acid phosphorylation; LOCATED IN: plasma membrane, membrane; EXPRESSED IN: cultured cell; CONTAINS InterPro DOMAIN/s: Serine/threonine-protein kinase domain (InterPro:IPR002290…	5.83028	22.9088	3.92928	1.97427	0.000272552	0.00365191
LOC_Os01g53170	Cytochrome P450 domain containing protein.	ATCG00350.1	Photosystem I, PsaA/PsaB protein \\ Encodes psaA protein comprising the reaction center for photosystem I along with psaB protein; hydrophobic protein encoded by the chloroplast genome. \\ PSAA; FUNCTIONS IN: chlorophyll binding; INVOLVED IN: photosynthesis; LOCATED IN: in 6 components; EXPRESSED IN: 24 plant structures; EXPRESSED DURING: 13 growth stages; CONTAINS InterPro DOMAIN/s: Photosystem …	6.32071	22.8926	3.62184	1.85672	0.00157637	0.0146617
LOC_Os05g19750		AT5G29646	transposable element gene \\ CACTA-like transposase family (Tnp2/En/Spm), has a 1.9e-233 P-value blast match to gb|AAG52024.1|AC022456_5 Tam1-homologous transposon protein TNP2, putative; 12762-16371 (Arabidopsis thaliana) (CACTA-element)	7.29034	22.5655	3.09526	1.63006	0.00369832	0.0280266
LOC_Os10g03950	Similar to OSIGBa0140L04.2 protein.	AT5G10530	Concanavalin A-like lectin protein kinase family protein \\ Concanavalin A-like lectin protein kinase family protein; FUNCTIONS IN: kinase activity; INVOLVED IN: protein amino acid phosphorylation; LOCATED IN: endomembrane system; EXPRESSED IN: root; CONTAINS InterPro DOMAIN/s: Legume lectin, beta chain (InterPro:IPR001220), Protein kinase, ATP binding site (InterPro:IPR017441), Serine/threonine-…	4.37396	21.8859	5.00368	2.32299	9.07761e-05	0.00150149
LOC_Os02g33410				0.970881	21.8463	22.5015	4.49195	0.00395063	0.0295821
LOC_Os11g05750	Non-protein coding transcript.			7.77329	21.2264	2.73069	1.44926	0.00642587	0.0424918
LOC_Os09g03810	Hypothetical conserved gene.			6.80116	21.1991	3.11699	1.64015	0.00353737	0.0271059
LOC_Os05g01140	SAM dependent carboxyl methyltransferase family protein.	AT5G38020	S-adenosyl-L-methionine-dependent methyltransferases superfamily protein \\ encodes a protein whose sequence is similar to SAM:salicylic acid carboxyl methyltransferase (SAMT) (GI:6002712)(Clarkia breweri) and to SAM:benzoic acid carboxyl methyltransferase (BAMT)(GI:9789277)(Antirrhinum majus) \\ S-adenosyl-L-methionine-dependent methyltransferases superfamily protein; CONTAINS InterPro DOMAIN/s:…	6.31697	20.5094	3.24672	1.69898	0.00496098	0.0351243
LOC_Os01g13690	Similar to Branched-chain-amino-acid aminotransferase-like protein 3, chloroplast precursor.	AT5G57850	D-aminoacid aminotransferase-like PLP-dependent enzymes superfamily protein \\ D-aminoacid aminotransferase-like PLP-dependent enzymes superfamily protein; FUNCTIONS IN: 4-amino-4-deoxychorismate lyase activity, catalytic activity; INVOLVED IN: tetrahydrofolate biosynthetic process; LOCATED IN: chloroplast; EXPRESSED IN: 24 plant structures; EXPRESSED DURING: 15 growth stages; CONTAINS InterPro D…	7.29034	20.1934	2.76989	1.46983	0.00791086	0.049405
LOC_Os06g01960	Hypothetical conserved gene.			6.31822	20.1715	3.1926	1.67473	0.00330447	0.0257418
LOC_Os12g07680	Similar to RNase P subunit p30 family protein.	AT5G59980	Polymerase/histidinol phosphatase-like \\ Polymerase/histidinol phosphatase-like; FUNCTIONS IN: tRNA-intron endonuclease activity, ribonuclease activity, catalytic activity; INVOLVED IN: tRNA processing; LOCATED IN: cellular_component unknown; EXPRESSED IN: trichome; CONTAINS InterPro DOMAIN/s: Polymerase/histidinol phosphatase-like (InterPro:IPR016195), RNase P subunit p30 (InterPro:IPR002738); …	5.83028	19.8627	3.40681	1.76842	0.00354922	0.0271555
LOC_Os01g43260				5.34609	19.532	3.65352	1.86929	0.00290795	0.0232903
LOC_Os06g27910	Hypothetical gene.	AT3G01570	Oleosin family protein \\ Oleosin family protein; FUNCTIONS IN: molecular_function unknown; INVOLVED IN: lipid storage; LOCATED IN: monolayer-surrounded lipid storage body, integral to membrane, membrane; CONTAINS InterPro DOMAIN/s: Oleosin (InterPro:IPR000136); BEST Arabidopsis thaliana protein match is: oleosin 2 (TAIR:AT5G40420.1); Has 516 Blast hits to 516 proteins in 52 species: Archae - 0; …	5.83527	19.532	3.34723	1.74297	0.00453749	0.0328154
LOC_Os05g30350	Similar to Hydroxyisourate hydrolase.	BGLU11	beta glucosidase 11 \\ beta glucosidase 11 (BGLU11); FUNCTIONS IN: cation binding, hydrolase activity, hydrolyzing O-glycosyl compounds, catalytic activity; INVOLVED IN: carbohydrate metabolic process; LOCATED IN: endomembrane system; EXPRESSED IN: 24 plant structures; EXPRESSED DURING: 13 growth stages; CONTAINS InterPro DOMAIN/s: Glycoside hydrolase, family 1 (InterPro:IPR001360), Glycoside hyd…	3.88602	19.5276	5.02508	2.32915	0.00032582	0.00421323
LOC_Os10g27380	No apical meristem (NAM) protein domain containing protein.			5.34609	18.8695	3.52959	1.8195	0.00254415	0.0210952
LOC_Os04g35030	Putative cellulose synthase-like protein H3.	CSLB03	cellulose synthase-like B3 \\ encodes a gene similar to cellulose synthase \\ cellulose synthase-like B3 (CSLB03); FUNCTIONS IN: cellulose synthase activity, transferase activity, transferring glycosyl groups, transferase activity; INVOLVED IN: cellulose biosynthetic process, polysaccharide biosynthetic process; LOCATED IN: membrane; CONTAINS InterPro DOMAIN/s: Cellulose synthase (InterPro:IPR005…	2.91389	17.8513	6.12629	2.61501	0.00059689	0.0068802
LOC_Os08g13710	Hypothetical gene.			2.92013	17.8321	6.10659	2.61037	0.000779207	0.00841749
LOC_Os04g59430	Similar to Auxin response factor 13.	ARF17	auxin response factor 17 \\ Posttranscriptionally regulated by miR160 and is essential for proper development.Regulates early auxin response genes. \\ auxin response factor 17 (ARF17); FUNCTIONS IN: sequence-specific DNA binding transcription factor activity; INVOLVED IN: anatomical structure morphogenesis, auxin mediated signaling pathway, adventitious root development, regulation of transcripti…	1.45757	16.4903	11.3135	3.49998	4.03005e-05	0.000757778
LOC_Os08g43050	Similar to NBS-LRR type resistance protein (Fragment).	AT3G14470	NB-ARC domain-containing disease resistance protein \\ NB-ARC domain-containing disease resistance protein; FUNCTIONS IN: protein binding; INVOLVED IN: apoptosis, defense response; LOCATED IN: endomembrane system; EXPRESSED IN: 23 plant structures; EXPRESSED DURING: 14 growth stages; CONTAINS InterPro DOMAIN/s: Leucine-rich repeat-containing protein (InterPro:IPR015766), NB-ARC (InterPro:IPR00218…	4.86065	16.1779	3.32835	1.73481	0.00524406	0.0366583
LOC_Os08g20220	Similar to cDNA clone:001-036-H04, full insert sequence.	AT4G07668	transposable element gene \\ gypsy-like retrotransposon family, has a 2.5e-141 P-value blast match to GB:AAD22153 polyprotein (Gypsy_Ty3-element) (Sorghum bicolor)	3.88852	15.1421	3.89406	1.96128	0.00571235	0.0390732
LOC_Os08g43654	Multi antimicrobial extrusion protein MatE family protein.	AT1G47530	MATE efflux family protein \\ MATE efflux family protein; FUNCTIONS IN: antiporter activity, drug transmembrane transporter activity, transporter activity; INVOLVED IN: drug transmembrane transport, ripening, transmembrane transport; LOCATED IN: plasma membrane, membrane; EXPRESSED IN: 23 plant structures; EXPRESSED DURING: 13 growth stages; CONTAINS InterPro DOMAIN/s: Multi antimicrobial extrusi…	1.45632	14.1253	9.69934	3.27789	0.000218695	0.0030481
LOC_Os06g50809	Conserved hypothetical protein.			2.91389	13.1453	4.51126	2.17353	0.00747096	0.047445
LOC_Os06g50659	Conserved hypothetical protein.			2.91389	13.1453	4.51126	2.17353	0.00747096	0.047445
LOC_Os06g12210	Helix-loop-helix protein, Brassinosteroid signaling	KDR	basic helix-loop-helix (bHLH) DNA-binding superfamily protein \\ Encodes a basic helix-loop-helix (bHLH) protein involved in blue/far-red light signaling. Physically interacts with HFR1 and negatively regulates its activity. \\ KIDARI (KDR); FUNCTIONS IN: transcription regulator activity; INVOLVED IN: response to light stimulus; LOCATED IN: nucleus, chloroplast; CONTAINS InterPro DOMAIN/s: Helix-…	1.45757	13.1253	9.00491	3.17071	0.000600172	0.00691144
LOC_Os06g21610		AT5G16505	transposable element gene \\ Mutator-like transposase family, has a 1.4e-59 P-value blast match to GB:AAA21566 mudrA of transposon=MuDR (MuDr-element) (Zea mays)	2.4297	12.811	5.27266	2.39853	0.00486321	0.0345741
LOC_Os02g05190	Protein of unknown function DUF1677, Oryza sativa family protein.			1.45757	12.4757	8.55923	3.09748	0.000641397	0.00726549
LOC_Os07g35700	Similar to KI domain interacting kinase 1.	CRK8	cysteine-rich RLK (RECEPTOR-like protein kinase) 8 \\ Encodes a cysteine-rich receptor-like protein kinase. \\ cysteine-rich RLK (RECEPTOR-like protein kinase) 8 (CRK8); FUNCTIONS IN: kinase activity; INVOLVED IN: protein amino acid phosphorylation; CONTAINS InterPro DOMAIN/s: Protein kinase, ATP binding site (InterPro:IPR017441), Reverse transcriptase, RNA-dependent DNA polymerase (InterPro:IPR0…	0.972129	10.7822	11.0913	3.47136	0.00218264	0.0187831
LOC_Os03g10110	Similar to Cupin family protein, expressed.	AT2G18540	RmlC-like cupins superfamily protein \\ RmlC-like cupins superfamily protein; FUNCTIONS IN: nutrient reservoir activity; INVOLVED IN: biological_process unknown; LOCATED IN: endomembrane system; CONTAINS InterPro DOMAIN/s: Cupin, RmlC-type (InterPro:IPR011051), Cupin 1 (InterPro:IPR006045), RmlC-like jelly roll fold (InterPro:IPR014710); BEST Arabidopsis thaliana protein match is: RmlC-like cupin…	0.972129	10.774	11.0829	3.47026	0.00262871	0.0216436
LOC_Os03g03164	Similar to HOS66 protein.	KNAT7	KNOTTED-like homeobox of Arabidopsis thaliana 7 \\ Encodes a homeodomain transcription factor of the Knotted family. May be involved in secondary cell wall biosynthesis. Mutants have moderately irregular xylem development. Expression of this gene is upregulated by SND1 and MYB46. \\ KNOTTED-like homeobox of Arabidopsis thaliana 7 (KNAT7); CONTAINS InterPro DOMAIN/s: ELK (InterPro:IPR005539), KNOX…	1.45632	10.0998	6.93514	2.79393	0.00324534	0.0254034
LOC_Os04g44460	Sulfotransferase family protein.	ST4B	sulfotransferase 4B \\ Encodes a sulfotransferase. Unlike the related ST4A protein (At2g14920), in vitro experiements show that this enzyme does not act brassinosteroids. ST4B is expressed in the roots and transcript levels rise in response to cytokinin treatment. \\ sulfotransferase 4B (ST4B); CONTAINS InterPro DOMAIN/s: Sulfotransferase domain (InterPro:IPR000863); BEST Arabidopsis thaliana pro…	0.972129	8.75531	9.00632	3.17094	0.00603989	0.0405544
LOC_Os04g05700		AT5G45480	Protein of unknown function (DUF594) \\ Protein of unknown function (DUF594); FUNCTIONS IN: molecular_function unknown; INVOLVED IN: biological_process unknown; LOCATED IN: plasma membrane; EXPRESSED IN: 17 plant structures; EXPRESSED DURING: 12 growth stages; CONTAINS InterPro DOMAIN/s: Protein of unknown function DUF594 (InterPro:IPR007658); BEST Arabidopsis thaliana protein match is: Protein o…	0	8.75445	Inf	20	0.000271612	0.00364292
LOC_Os04g40350				0	8.4265	Inf	20	0.000927729	0.00965546
LOC_Os08g27800		AT3G32899	transposable element gene \\ gypsy-like retrotransposon family, has a 7.0e-240 P-value blast match to GB:AAD19359 polyprotein (gypsy_Ty3-element) (Sorghum bicolor)	0.48544	8.06119	16.6059	4.05363	0.00202979	0.0177674
LOC_Os11g09610				0	7.06187	Inf	20	0.001778	0.0160841
LOC_Os01g12070	Similar to Cellulase.	GH9C2	glycosyl hydrolase 9C2 \\ glycosyl hydrolase 9C2 (GH9C2); FUNCTIONS IN: carbohydrate binding, hydrolase activity, hydrolyzing O-glycosyl compounds, catalytic activity; INVOLVED IN: carbohydrate metabolic process; LOCATED IN: endomembrane system, extracellular region; EXPRESSED IN: 23 plant structures; EXPRESSED DURING: 13 growth stages; CONTAINS InterPro DOMAIN/s: Six-hairpin glycosidase (InterPr…	0	5.719	Inf	20	0.00606572	0.0406571

## Sheet: Table S3
AccID	Description	Blast_Symbol	Blast_Description	WT_2mm	osvil2_2 mm	FoldChange	Log2FC	P-Value	FDR
LOC_Os02g45770	Similar to MADS box protein.	AGL6	AGAMOUS-like 6 \\ sequence suggests this encodes a MADS-box transcription factor \\ AGAMOUS-like 6 (AGL6); FUNCTIONS IN: DNA binding, sequence-specific DNA binding transcription factor activity; INVOLVED IN: vegetative to reproductive phase transition of meristem, floral organ development; LOCATED IN: nucleus; EXPRESSED IN: 8 plant structures; EXPRESSED DURING: C globular stage, F mature embryo s…	5235.33	1839.78	0.351417	-1.50874	7.27472e-86	1.78819e-82
LOC_Os03g11614	MADS-domain-containing protein, Sexual reproduction	2017-09-02	K-box region and MADS-box transcription factor family protein \\ MADS-box protein, binds K domain of AG in vivo \\ SEPALLATA 2 (SEP2); FUNCTIONS IN: protein binding, DNA binding, sequence-specific DNA binding transcription factor activity; INVOLVED IN: flower development, ovule development; LOCATED IN: nucleus; EXPRESSED IN: 12 plant structures; EXPRESSED DURING: 7 growth stages; CONTAINS InterPr…	4493.6	2096.63	0.466581	-1.0998	6.39309e-47	6.40232e-44
LOC_Os03g23010	Similar to Poly(A)-binding protein C-terminal interacting protein 6.	ERD15	dehydration-induced protein (ERD15) \\ Encodes hydrophilic protein lacking Cys residues that is expressed in response to drought stress, light stress and treatment with plant-growth-promoting rhizobacteria (Paenibacillus polymyxa), possibly revealing a connection between responses to biotic and abiotic stress. Also identified as a CTC Interacting Domain (CID) protein in a yeast two hybrid screen …	3841.41	1830.39	0.476489	-1.06948	0.00169363	0.0154867
LOC_Os05g29810	Similar to EREBP-2 protein (Fragment).	EBP	ethylene-responsive element binding protein \\ Encodes a member of the ERF (ethylene response factor) subfamily B-2 of the plant specific ERF/AP2 transcription factor family (RAP2.3). The protein contains one AP2 domain. There are 5 members in this subfamily including RAP2.2 AND RAP2.12.It is localized to the nucleus and acts as a transcriptional activator through the GCC-box. It has been identif…	3213.72	1387.04	0.431599	-1.21224	1.09971e-35	6.19482e-33
LOC_Os02g41904	Similar to Defensin precursor.	PDF2.1	Scorpion toxin-like knottin superfamily protein \\ Predicted to encode a PR (pathogenesis-related) protein. Belongs to the plant defensin (PDF) family with the following members: At1g75830/PDF1.1, At5g44420/PDF1.2a, At2g26020/PDF1.2b, At5g44430/PDF1.2c, At2g26010/PDF1.3, At1g19610/PDF1.4, At1g55010/PDF1.5, At2g02120/PDF2.1, At2g02100/PDF2.2, At2g02130/PDF2.3, At1g61070/PDF2.4, At5g63660/PDF2.5, A…	2603.81	956.529	0.367357	-1.44475	1.66066e-13	1.89462e-11
LOC_Os08g41950	Similar to MADS-box transcription factor 7.	2017-09-03	K-box region and MADS-box transcription factor family protein \\ Member of the MADs box transcription factor family. SEP3 is redundant with SEP1 and 2. Flowers of SEP1/2/3 triple mutants show a conversion of petals and stamens to sepals.SEP3 forms heterotetrameric complexes with other MADS box family members and binds to the CArG box motif. \\ SEPALLATA3 (SEP3); FUNCTIONS IN: protein binding, DNA…	2374.77	884.218	0.372338	-1.42531	8.67805e-15	1.17323e-12
LOC_Os09g32948	MADS box protein.	2017-09-03	K-box region and MADS-box transcription factor family protein \\ Member of the MADs box transcription factor family. SEP3 is redundant with SEP1 and 2. Flowers of SEP1/2/3 triple mutants show a conversion of petals and stamens to sepals.SEP3 forms heterotetrameric complexes with other MADS box family members and binds to the CArG box motif. \\ SEPALLATA3 (SEP3); FUNCTIONS IN: protein binding, DNA…	2361.19	629.553	0.266626	-1.90711	7.1563e-108	2.76427e-104
LOC_Os03g14010	Similar to Glycosyl hydrolase family 10 protein, expressed.	AT4G38650	Glycosyl hydrolase family 10 protein \\ Glycosyl hydrolase family 10 protein; FUNCTIONS IN: cation binding, hydrolase activity, hydrolyzing O-glycosyl compounds, catalytic activity; INVOLVED IN: carbohydrate metabolic process; LOCATED IN: endomembrane system; CONTAINS InterPro DOMAIN/s: Glycoside hydrolase, family 10 (InterPro:IPR001000), Glycoside hydrolase, catalytic core (InterPro:IPR017853), …	1739.55	821.818	0.47243	-1.08183	2.3379e-35	1.29009e-32
LOC_Os08g40180	Similar to 3-hydroxy-3-methylglutaryl coenzyme A reductase (EC 1.1.1.34) (Fragment).	HMG1	hydroxy methylglutaryl CoA reductase 1 \\ Encodes a 3-hydroxy-3-methylglutaryl coenzyme A reductase, which is involved in melavonate biosynthesis and performs the first committed step in isoprenoid biosynthesis. Expression is activated in dark in leaf tissue but not controlled by light in the root (confine \\ hydroxy methylglutaryl CoA reductase 1 (HMG1); CONTAINS InterPro DOMAIN/s: Hydroxymethyl…	1593.79	689.153	0.432399	-1.20957	1.24119e-08	6.51662e-07
LOC_Os06g49840	MADS-box protein SPW1.	AP3	K-box region and MADS-box transcription factor family protein \\ Floral homeotic gene encoding a MADS domain protein homologous to SRF transcription factors. Specifies petal and stamen identities. Associates with PISTILLATA. \\ APETALA 3 (AP3); CONTAINS InterPro DOMAIN/s: Transcription factor, MADS-box (InterPro:IPR002100), Transcription factor, K-box (InterPro:IPR002487); BEST Arabidopsis thalia…	1377.45	433.967	0.315051	-1.66634	3.45089e-29	1.41377e-26
LOC_Os05g48700	Similar to gibberellin 2-beta-dioxygenase.	ATGA2OX1	Arabidopsis thaliana gibberellin 2-oxidase 1 \\ Encodes a gibberellin 2-oxidase that acts on C19 gibberellins. \\ Arabidopsis thaliana gibberellin 2-oxidase 1 (ATGA2OX1); CONTAINS InterPro DOMAIN/s: Isopenicillin N synthase (InterPro:IPR002283), Oxoglutarate/iron-dependent oxygenase (InterPro:IPR005123); BEST Arabidopsis thaliana protein match is: gibberellin 2-oxidase (TAIR:AT1G30040.1); Has 841…	1222.34	541.034	0.44262	-1.17586	2.91145e-08	1.42872e-06
LOC_Os11g44500	Similar to Protein kinase domain containing protein, expressed.	CCR3	CRINKLY4 related 3 \\ CRINKLY4 related 3 (CCR3); FUNCTIONS IN: kinase activity; INVOLVED IN: protein amino acid phosphorylation; LOCATED IN: endomembrane system; EXPRESSED IN: 23 plant structures; EXPRESSED DURING: 10 growth stages; CONTAINS InterPro DOMAIN/s: Protein kinase, ATP binding site (InterPro:IPR017441), Regulator of chromosome condensation/beta-lactamase-inhibitor protein II (InterPro:…	840.406	416.878	0.496043	-1.01146	5.60647e-06	0.000146893
LOC_Os03g03510	Similar to CBL-interacting protein kinase 9.	CIPK9	CBL-interacting protein kinase 9 \\ Encodes a CBL-interacting protein kinase with similarity to SOS2 \\ CBL-interacting protein kinase 9 (CIPK9); FUNCTIONS IN: protein serine/threonine kinase activity, protein kinase activity, kinase activity, ATP binding; INVOLVED IN: in 6 processes; EXPRESSED IN: 23 plant structures; EXPRESSED DURING: 15 growth stages; CONTAINS InterPro DOMAIN/s: Protein kinase…	824.536	345.182	0.418638	-1.25622	0.0040947	0.0303832
LOC_Os03g16670	HAD-superfamily hydrolase, subfamily IA, variant 3 domain containing protein.	AT5G02230	Haloacid dehalogenase-like hydrolase (HAD) superfamily protein \\ Haloacid dehalogenase-like hydrolase (HAD) superfamily protein; FUNCTIONS IN: hydrolase activity, catalytic activity; INVOLVED IN: metabolic process; LOCATED IN: cellular_component unknown; EXPRESSED IN: 24 plant structures; EXPRESSED DURING: 15 growth stages; CONTAINS InterPro DOMAIN/s: Haloacid dehalogenase-like hydrolase (InterP…	788.684	337.97	0.428525	-1.22255	0.000131601	0.00202987
LOC_Os03g18770	Wound-induced protein, Wun1 domain containing protein.	SAG20	senescence associated gene 20 \\ A senescence-associated gene whose expression is induced in response to treatment with Nep1, a fungal protein that causes necrosis. \\ senescence associated gene 20 (SAG20); CONTAINS InterPro DOMAIN/s: Wound-induced protein, Wun1, subgroup (InterPro:IPR016533), Wound-induced protein, Wun1 (InterPro:IPR009798); BEST Arabidopsis thaliana protein match is: Nuclear tr…	664.823	264.369	0.397654	-1.33041	6.097e-06	0.000156411
LOC_Os01g03360				661.027	302.74	0.457984	-1.12663	4.60114e-07	1.6642e-05
LOC_Os01g10504	Similar to M23 protein (Fragment).	AG	K-box region and MADS-box transcription factor family protein \\ Floral homeotic gene encoding a MADS domain transcription factor. Specifies floral meristem and carpel and stamen identity. Binds CArG box sequences. It is the only C function gene. It interacts genetically with the other homeotic genes to specify the floral organs. \\ AGAMOUS (AG); FUNCTIONS IN: DNA binding, sequence-specific DNA b…	635.246	194.325	0.305906	-1.70884	1.7165e-46	1.65759e-43
LOC_Os02g51080	Similar to Geranylgeranyl reductase (Fragment).	AT1G74470	Pyridine nucleotide-disulphide oxidoreductase family protein \\ Encodes for a multifunctional protein with geranylgeranyl reductase activity shown to catalyze the reduction of prenylated geranylgeranyl-chlorophyll a to phytyl-chlorophyll a (chlorophyll a) and free geranylgeranyl pyrophosphate to phytyl pyrophosphate. \\ Pyridine nucleotide-disulphide oxidoreductase family protein; FUNCTIONS IN: g…	627.027	230.45	0.367527	-1.44408	2.21702e-08	1.10398e-06
LOC_Os02g42810	Similar to Carbonyl reductase 1.	AT1G01800	NAD(P)-binding Rossmann-fold superfamily protein \\ NAD(P)-binding Rossmann-fold superfamily protein; FUNCTIONS IN: oxidoreductase activity, binding, catalytic activity; INVOLVED IN: oxidation reduction, metabolic process; LOCATED IN: plant-type cell wall; EXPRESSED IN: 22 plant structures; EXPRESSED DURING: 13 growth stages; CONTAINS InterPro DOMAIN/s: NAD(P)-binding domain (InterPro:IPR016040),…	613.431	273.321	0.445561	-1.16631	4.30235e-18	8.49134e-16
LOC_Os03g19560	Tetratricopeptide-like helical domain containing protein.	HCF107	high chlorophyll fluorescent 107 \\ It is a RNA tetratricopeptide repeat-containing protein required for normal processing of transcripts from the polycistronic chloroplast psbB-psbT-psbH-petB-petD operon coding for proteins of the photosystem II and cytochrome b6/f complexes. Localizes to the chloroplast membrane. Involved in regulating plastidial gene expression and biogenesis. \\ high chloroph…	576.45	240.883	0.417874	-1.25886	1.35541e-05	0.000301141
LOC_Os05g38270	Similar to regulator of chromosome condensation (RCC1) family protein.	AT3G55580	Regulator of chromosome condensation (RCC1) family protein \\ Regulator of chromosome condensation (RCC1) family protein; CONTAINS InterPro DOMAIN/s: Regulator of chromosome condensation/beta-lactamase-inhibitor protein II (InterPro:IPR009091), Regulator of chromosome condensation, RCC1 (InterPro:IPR000408); BEST Arabidopsis thaliana protein match is: Regulator of chromosome condensation (RCC1) f…	564.319	268.273	0.475392	-1.07281	0.00271139	0.0221557
LOC_Os05g13580	Similar to TCH2 (TOUCH 2)	TCH2	EF hand calcium-binding protein family \\ Encodes a protein with 40% similarity to calmodulin. Binds Ca(2+) and, as a consequence, undergoes conformational changes. CML24 expression occurs in all major organs, and transcript levels are increased from 2- to 15-fold in plants subjected to touch, darkness, heat, cold, hydrogen peroxide, abscisic acid (ABA), and indole-3-acetic acid. However, CML24 p…	559.367	241.451	0.431651	-1.21206	6.97889e-05	0.00120885
LOC_Os02g36490	General substrate transporter domain containing protein.	AT1G34580	Major facilitator superfamily protein \\ Major facilitator superfamily protein; FUNCTIONS IN: carbohydrate transmembrane transporter activity, sugar:hydrogen symporter activity; INVOLVED IN: transport, transmembrane transport; LOCATED IN: integral to membrane, membrane; EXPRESSED IN: 12 plant structures; EXPRESSED DURING: 7 growth stages; CONTAINS InterPro DOMAIN/s: Sugar transporter, conserved s…	523.471	213.94	0.408695	-1.2909	1.47215e-07	6.09577e-06
LOC_Os01g74300	RicMT (Metallothionein-like protein).			471.003	233.356	0.495444	-1.01321	7.35432e-14	8.9172e-12
LOC_Os01g66590	Similar to LOB domain protein 6 (ASYMMETRIC LEAVES2).	AS2	Lateral organ boundaries (LOB) domain family protein \\ required for formation of a symmetric flat leaf lamina, encodes a member of a family of proteins characterized by cysteine repeats and a leucine zipper; involved in KNOX gene regulation. Acts together with ASL1 in proximal-distal symmetry determination. Forms a complex with AS1 that binds to the BP promoter and leads to silencing of BP. \\ A…	445.205	188.69	0.423826	-1.23846	5.79977e-14	7.12977e-12
LOC_Os05g34940	Similar to PISTILLATA-like MADS box protein.	PI	K-box region and MADS-box transcription factor family protein \\ Floral homeotic gene encoding a MADS domain transcription factor. Required for the specification of petal and stamen identities. \\ PISTILLATA (PI); FUNCTIONS IN: DNA binding, sequence-specific DNA binding transcription factor activity; INVOLVED IN: regulation of transcription, DNA-dependent; LOCATED IN: nucleus, cytoplasm; EXPRESSE…	400.999	119.196	0.297247	-1.75026	1.374e-21	3.79098e-19
LOC_Os06g05010	Similar to Early nodulin.	AT5G25940	early nodulin-related \\ early nodulin-related; FUNCTIONS IN: molecular_function unknown; LOCATED IN: mitochondrion; EXPRESSED IN: 24 plant structures; EXPRESSED DURING: 16 growth stages; CONTAINS InterPro DOMAIN/s: Early nodulin 93 ENOD93 protein (InterPro:IPR005050); Has 1807 Blast hits to 1807 proteins in 277 species: Archae - 0; Bacteria - 0; Metazoa - 736; Fungi - 347; Plants - 385; Viruses …	399.198	78.0873	0.19561	-2.35395	7.05425e-06	0.000175474
LOC_Os07g04840	Similar to 23 kDa polypeptide of photosystem II.	PSBP-1	photosystem II subunit P-1 \\ Encodes a 23 kD extrinsic protein that is part of photosystem II and participates in the regulation of oxygen evolution. \\ photosystem II subunit P-1 (PSBP-1); FUNCTIONS IN: poly(U) RNA binding; INVOLVED IN: photosynthesis, light reaction, defense response to bacterium, response to light intensity; LOCATED IN: in 12 components; EXPRESSED IN: 27 plant structures; EXP…	398.597	178.35	0.447446	-1.16022	5.20697e-10	3.67601e-08
LOC_Os08g12410	Pectin lyase fold/virulence factor domain containing protein.	AT3G43270	Plant invertase/pectin methylesterase inhibitor superfamily \\ Plant invertase/pectin methylesterase inhibitor superfamily; FUNCTIONS IN: enzyme inhibitor activity, pectinesterase activity; INVOLVED IN: cell wall modification; LOCATED IN: plant-type cell wall; EXPRESSED IN: 21 plant structures; EXPRESSED DURING: 10 growth stages; CONTAINS InterPro DOMAIN/s: Pectinesterase, active site (InterPro:I…	371.834	170.762	0.459243	-1.12267	5.85358e-08	2.66456e-06
LOC_Os01g04330	EF-HAND 2 domain containing protein.	CML23	calmodulin like 23 \\ Encodes a calmodulin-like protein. Regulates nitric oxide levels and transition to flowering. \\ calmodulin like 23 (CML23); FUNCTIONS IN: calcium ion binding; INVOLVED IN: regulation of flower development, regulation of nitric oxide metabolic process; LOCATED IN: cellular_component unknown; EXPRESSED IN: 28 plant structures; EXPRESSED DURING: 9 growth stages; CONTAINS Inter…	343.496	41.0762	0.119583	-3.06392	0.00387642	0.0291151
LOC_Os11g31900	Similar to Acyl carrier protein, chloroplast precursor (ACP) (ACP05) (Clone 29C08).	ACP4	acyl carrier protein 4 \\ encodes an acyl carrier protein predominantly expressed in leaves. Gene expression is upregulated by light. \\ acyl carrier protein 4 (ACP4); FUNCTIONS IN: acyl carrier activity; INVOLVED IN: response to light stimulus, fatty acid biosynthetic process; LOCATED IN: chloroplast stroma, chloroplast, chloroplast envelope; EXPRESSED IN: 22 plant structures; EXPRESSED DURING: …	338.806	168.306	0.496762	-1.00937	0.000616835	0.00704928
LOC_Os03g26650	Heavy metal transport/detoxification protein domain containing protein.	AT4G39700	Heavy metal transport/detoxification superfamily protein \\ Heavy metal transport/detoxification superfamily protein ; FUNCTIONS IN: metal ion binding; INVOLVED IN: metal ion transport; LOCATED IN: cellular_component unknown; CONTAINS InterPro DOMAIN/s: Heavy metal transport/detoxification protein (InterPro:IPR006121); BEST Arabidopsis thaliana protein match is: Heavy metal transport/detoxificati…	337.794	167.397	0.495558	-1.01287	9.41528e-14	1.10687e-11
LOC_Os01g56780	Plus-3 domain containing protein.	TZP	zinc knuckle (CCHC-type) family protein \\ Encodes a zinc knuckle protein that negatively regulates morning specific growth. The role of TZP in hypocotyl elongation was established through a QTL analysis of BayXSha RIL populations. The Bay-0 allele contains a deletion causing a frameshift mutation. TZP is under circadian control and acts to regulate morning-specific hypocotyl growth. \\ TZP; FUNC…	330.486	157.074	0.475282	-1.07314	0.00145345	0.0137701
LOC_Os06g05020	Early nodulin.	AT5G25940	early nodulin-related \\ early nodulin-related; FUNCTIONS IN: molecular_function unknown; LOCATED IN: mitochondrion; EXPRESSED IN: 24 plant structures; EXPRESSED DURING: 16 growth stages; CONTAINS InterPro DOMAIN/s: Early nodulin 93 ENOD93 protein (InterPro:IPR005050); Has 1807 Blast hits to 1807 proteins in 277 species: Archae - 0; Bacteria - 0; Metazoa - 736; Fungi - 347; Plants - 385; Viruses …	305.351	30.2606	0.0991011	-3.33495	2.35242e-06	6.93589e-05
LOC_Os09g17740	Similar to Chlorophyll a-b binding protein, chloroplast precursor (LHCII type I CAB) (LHCP).	LHB1B2	photosystem II light harvesting complex gene B1B2 \\ Photosystem II type I chlorophyll a/b-binding protein \\ photosystem II light harvesting complex gene B1B2 (LHB1B2); FUNCTIONS IN: chlorophyll binding; INVOLVED IN: photosynthesis, light harvesting in photosystem II, photosynthesis; LOCATED IN: in 7 components; EXPRESSED IN: cotyledon, guard cell, juvenile leaf, cultured cell, leaf; EXPRESSED D…	287.805	42.7078	0.148391	-2.75252	1.32067e-06	4.24103e-05
LOC_Os03g01740	Similar to EL2 protein.			283.308	112.759	0.398011	-1.32912	0.000322959	0.00418623
LOC_Os05g34950	Protein kinase, core domain containing protein.	AT1G11050	Protein kinase superfamily protein \\ Protein kinase superfamily protein; FUNCTIONS IN: kinase activity; INVOLVED IN: protein amino acid phosphorylation; LOCATED IN: endomembrane system; EXPRESSED IN: 18 plant structures; EXPRESSED DURING: 10 growth stages; CONTAINS InterPro DOMAIN/s: Protein kinase, ATP binding site (InterPro:IPR017441), Protein kinase, catalytic domain (InterPro:IPR000719), Ser…	281.418	126.255	0.448637	-1.15638	4.72253e-15	6.65065e-13
LOC_Os07g05690	Conserved hypothetical protein.			262.962	90.1499	0.342826	-1.54445	4.19073e-09	2.41092e-07
LOC_Os11g44030				262.416	129.317	0.492794	-1.02094	4.2656e-06	0.000115222
LOC_Os05g43650	Similar to T4P13.26 protein.	AT3G01060	unknown protein; Has 640 Blast hits to 638 proteins in 201 species: Archae - 0; Bacteria - 293; Metazoa - 0; Fungi - 71; Plants - 72; Viruses - 0; Other Eukaryotes - 204 (source: NCBI BLink).	256.14	124.905	0.487643	-1.0361	1.33351e-06	4.27076e-05
LOC_Os01g73000	Zinc finger, RING/FYVE/PHD-type domain containing protein.	AT5G63970	Copine (Calcium-dependent phospholipid-binding protein) family \\ Copine (Calcium-dependent phospholipid-binding protein) family; FUNCTIONS IN: zinc ion binding; INVOLVED IN: biological_process unknown; LOCATED IN: cellular_component unknown; EXPRESSED IN: 17 plant structures; EXPRESSED DURING: 7 growth stages; CONTAINS InterPro DOMAIN/s: Zinc finger, RING-type (InterPro:IPR001841), Copine (Inter…	254.242	123.872	0.487218	-1.03736	3.78038e-09	2.19823e-07
LOC_Os05g11414	Similar to MADS box protein.	AG	K-box region and MADS-box transcription factor family protein \\ Floral homeotic gene encoding a MADS domain transcription factor. Specifies floral meristem and carpel and stamen identity. Binds CArG box sequences. It is the only C function gene. It interacts genetically with the other homeotic genes to specify the floral organs. \\ AGAMOUS (AG); FUNCTIONS IN: DNA binding, sequence-specific DNA b…	247.872	60.9907	0.246057	-2.02293	4.35846e-24	1.55064e-21
LOC_Os01g21120	Similar to EREBP-3 protein (Fragment).	HRE2	Integrase-type DNA-binding superfamily protein \\ encodes a member of the ERF (ethylene response factor) subfamily B-2 of ERF/AP2 transcription factor family. The protein contains one AP2 domain. There are 5 members in this subfamily including RAP2.2 AND RAP2.12. \\ HYPOXIA RESPONSIVE ERF (ETHYLENE RESPONSE FACTOR) 2 (HRE2); CONTAINS InterPro DOMAIN/s: DNA-binding, integrase-type (InterPro:IPR016…	237.576	47.1021	0.198261	-2.33453	0.00267526	0.02194
LOC_Os11g37900	Similar to 3-ketoacyl-CoA synthase.	KCS2	3-ketoacyl-CoA synthase 2 \\ Encodes KCS2, a member of the 3-ketoacyl-CoA synthase family involved in the biosynthesis of VLCFA (very long chain fatty acids). \\ 3-ketoacyl-CoA synthase 2 (KCS2); FUNCTIONS IN: fatty acid elongase activity; INVOLVED IN: response to wounding, response to osmotic stress, suberin biosynthetic process; LOCATED IN: membrane; EXPRESSED IN: 17 plant structures; EXPRESSED…	235.228	116.835	0.49669	-1.00958	1.33466e-06	4.27076e-05
LOC_Os06g02900	Peptidase aspartic, catalytic domain containing protein.	AT5G10770	Eukaryotic aspartyl protease family protein \\ Eukaryotic aspartyl protease family protein; FUNCTIONS IN: DNA binding, aspartic-type endopeptidase activity; INVOLVED IN: proteolysis; EXPRESSED IN: 12 plant structures; EXPRESSED DURING: 4 anthesis, C globular stage, petal differentiation and expansion stage, E expanded cotyledon stage; CONTAINS InterPro DOMAIN/s: Peptidase aspartic (InterPro:IPR02…	227.992	90.9345	0.398849	-1.32609	1.64518e-13	1.88492e-11
LOC_Os05g41950	Serine/threonine protein kinase domain containing protein.	AT3G20530	Protein kinase superfamily protein \\ Protein kinase superfamily protein; FUNCTIONS IN: protein serine/threonine kinase activity, protein kinase activity, kinase activity, ATP binding; INVOLVED IN: protein amino acid phosphorylation; EXPRESSED IN: 9 plant structures; EXPRESSED DURING: L mature pollen stage, M germinated pollen stage, 4 anthesis, C globular stage, petal differentiation and expansi…	225.045	97.3433	0.432551	-1.20906	6.43771e-14	7.84095e-12
LOC_Os04g57550	Similar to Suppressor of presenilin 5 (P110b homolog).	PAO3	polyamine oxidase 3 \\ polyamine oxidase 3 (PAO3); CONTAINS InterPro DOMAIN/s: Amine oxidase (InterPro:IPR002937), Flavin-containing amine oxidase (InterPro:IPR001613); BEST Arabidopsis thaliana protein match is: polyamine oxidase 2 (TAIR:AT2G43020.1); Has 6641 Blast hits to 6191 proteins in 1102 species: Archae - 131; Bacteria - 2618; Metazoa - 1408; Fungi - 589; Plants - 766; Viruses - 0; Other…	220.099	90.8849	0.412927	-1.27604	0.00109226	0.0109954
LOC_Os03g52460	Similar to Glucose-1-phosphate adenylyltransferase large subunit 2 (EC 2.7.7.27) (ADP-glucose synthase) (ADP-glucose pyrophosphorylase) (AGPASE S) (Alpha-D-glucose-1-phosphate adenyl transferase) (BLPL) (Fragment).	APL1	ADP glucose pyrophosphorylase large subunit 1 \\ Encodes the large subunit of ADP-glucose pyrophosphorylase which catalyzes the first, rate limiting step in starch biosynthesis. The large subunit plays a regulatory role whereas the small subunit (ApS) is the catalytic isoform. Four isoforms (ApL1-4) have been identified. ApL1 is the major large subunit isoform present in leaves. Mutational analys…	219.721	96.9266	0.441135	-1.18071	3.81778e-13	4.26565e-11
LOC_Os06g14450	Conserved hypothetical protein.	EXO70F1	exocyst subunit exo70 family protein F1 \\ A member of EXO70 gene family, putative exocyst subunits, conserved in land plants. Arabidopsis thaliana contains 23 putative EXO70 genes, which can be classified into eight clusters on the phylogenetic tree. \\ exocyst subunit exo70 family protein F1 (EXO70F1); INVOLVED IN: exocytosis, vesicle docking involved in exocytosis; LOCATED IN: plasma membrane,…	219.16	91.9466	0.419542	-1.25311	9.75896e-07	3.25769e-05
LOC_Os08g05080				218.232	96.2427	0.44101	-1.18112	1.61547e-12	1.67359e-10
LOC_Os06g49860	Similar to Ankyrin-like protein.	AT3G51070	S-adenosyl-L-methionine-dependent methyltransferases superfamily protein \\ S-adenosyl-L-methionine-dependent methyltransferases superfamily protein; CONTAINS InterPro DOMAIN/s: Protein of unknown function DUF248, methyltransferase putative (InterPro:IPR004159); BEST Arabidopsis thaliana protein match is: S-adenosyl-L-methionine-dependent methyltransferases superfamily protein (TAIR:AT5G64030.1);…	208.038	68.0218	0.326968	-1.61278	1.59193e-18	3.36284e-16
LOC_Os07g37550	Similar to Type III chlorophyll a/b-binding protein (Fragment).	LHCB3	light-harvesting chlorophyll B-binding protein 3 \\ Lhcb3 protein is a component of the main light harvesting chlorophyll a/b-protein complex of Photosystem II (LHC II). \\ light-harvesting chlorophyll B-binding protein 3 (LHCB3); FUNCTIONS IN: structural molecule activity; INVOLVED IN: photosynthesis; LOCATED IN: light-harvesting complex, thylakoid, chloroplast thylakoid membrane, chloroplast; E…	205.168	65.6139	0.319806	-1.64473	5.30014e-10	3.73204e-08
LOC_Os09g26520				203.622	75.0694	0.368671	-1.43959	4.88128e-15	6.80334e-13
LOC_Os07g37030	Rieske [2Fe-2S] region domain containing protein.	PETC	photosynthetic electron transfer C \\ Encodes the Rieske FeS center of cytochrome b6f complex. Gene is expressed in shoot but not in root. Mutant has reduced electron transport at saturating light intensities and Q-cycle activity is hypersensitive to acidification of the thylakoid lumen. \\ photosynthetic electron transfer C (PETC); FUNCTIONS IN: electron transporter, transferring electrons from …	201.232	89.127	0.442906	-1.17493	0.00010289	0.00166689
LOC_Os04g57760	Similar to H0403D02.10 protein.			197.774	80.4468	0.406762	-1.29774	0.00156165	0.0145454
LOC_Os01g07850	Glyoxalase/bleomycin resistance protein/dioxygenase domain containing protein.	AT1G80160	Lactoylglutathione lyase / glyoxalase I family protein \\ Lactoylglutathione lyase / glyoxalase I family protein; CONTAINS InterPro DOMAIN/s: Glyoxalase/bleomycin resistance protein/dioxygenase (InterPro:IPR004360); BEST Arabidopsis thaliana protein match is: Lactoylglutathione lyase / glyoxalase I family protein (TAIR:AT1G15380.2); Has 30201 Blast hits to 17322 proteins in 780 species: Archae - …	193.464	77.3191	0.399657	-1.32317	5.29459e-05	0.000958878
LOC_Os11g07600	Similar to ATPase, coupled to transmembrane movement of substances.	ABCG25	ATP-binding casette family G25 \\ Encodes a plasma membrane localized ABC transporter involved in abscisic acid transport and responses. \\ ATP-binding casette family G25 (ABCG25); CONTAINS InterPro DOMAIN/s: ATPase, AAA+ type, core (InterPro:IPR003593), ABC transporter-like (InterPro:IPR003439), ABC-2 type transporter (InterPro:IPR013525); BEST Arabidopsis thaliana protein match is: ATP-binding …	190.033	87.9934	0.463043	-1.11078	3.04962e-07	1.15813e-05
LOC_Os04g38410	Similar to Chlorophyll a/b-binding protein CP24, photosystem II (Fragment).	LHCB6	light harvesting complex photosystem II subunit 6 \\ Lhcb6 protein (Lhcb6), light harvesting complex of photosystem II. \\ light harvesting complex photosystem II subunit 6 (LHCB6); FUNCTIONS IN: chlorophyll binding; INVOLVED IN: photosynthesis, nonphotochemical quenching; LOCATED IN: in 7 components; EXPRESSED IN: 24 plant structures; EXPRESSED DURING: 14 growth stages; CONTAINS InterPro DOMAIN/…	187.63	52.518	0.279902	-1.837	8.9645e-22	2.52491e-19
LOC_Os06g14420	Similar to Nudix hydrolase 18, mitochondrial precursor (EC 3.6.1.-) (AtNUDT18).	NUDT21	nudix hydrolase homolog 21 \\ nudix hydrolase homolog 21 (NUDT21); FUNCTIONS IN: hydrolase activity; INVOLVED IN: biological_process unknown; LOCATED IN: chloroplast; EXPRESSED IN: 24 plant structures; EXPRESSED DURING: 15 growth stages; CONTAINS InterPro DOMAIN/s: NUDIX hydrolase domain-like (InterPro:IPR015797), NUDIX hydrolase, conserved site (InterPro:IPR020084), NUDIX hydrolase domain (Inter…	184.23	61.597	0.334348	-1.58058	1.25904e-15	1.89128e-13
LOC_Os01g40070	Phospholipase A2, active site domain containing protein.	AT5G12010	unknown protein; INVOLVED IN: response to salt stress; LOCATED IN: chloroplast, plasma membrane, membrane; EXPRESSED IN: 23 plant structures; EXPRESSED DURING: 13 growth stages; BEST Arabidopsis thaliana protein match is: unknown protein (TAIR:AT4G29780.1); Has 1807 Blast hits to 1807 proteins in 277 species: Archae - 0; Bacteria - 0; Metazoa - 736; Fungi - 347; Plants - 385; Viruses - 0; Other E…	174.947	64.9604	0.371315	-1.42929	0.00147457	0.013902
LOC_Os04g54310		AT4G10270	Wound-responsive family protein \\ Wound-responsive family protein; CONTAINS InterPro DOMAIN/s: Protein of unknown function wound-induced (InterPro:IPR022251); BEST Arabidopsis thaliana protein match is: Wound-responsive family protein (TAIR:AT4G10265.1); Has 183 Blast hits to 182 proteins in 16 species: Archae - 0; Bacteria - 0; Metazoa - 0; Fungi - 0; Plants - 183; Viruses - 0; Other Eukaryotes…	164.775	58.8288	0.357024	-1.48591	0.00272772	0.022222
LOC_Os12g02040	Hypoxia induced protein conserved region family protein.			156.575	51.4397	0.32853	-1.6059	0.00633383	0.0420374
LOC_Os01g28790	Conserved hypothetical protein.			156.479	43.9374	0.280788	-1.83245	0.00171803	0.0156516
LOC_Os01g15900	Zinc finger, Dof-type domain containing protein.	CDF2	cycling DOF factor 2 \\ Dof-type zinc finger domain-containing protein, identical to H-protein promoter binding factor-2a GI:3386546 from (Arabidopsis thaliana). Interacts with LKP2 and FKF1, but its overexpression does not change flowering time under short or long day conditions. \\ cycling DOF factor 2 (CDF2); CONTAINS InterPro DOMAIN/s: Zinc finger, Dof-type (InterPro:IPR003851); BEST Arabidop…	143.876	65.8758	0.457864	-1.12701	0.00728959	0.0465745
LOC_Os05g25400	Ribonuclease III domain containing protein.	AT1G55140	Ribonuclease III family protein \\ Ribonuclease III family protein; FUNCTIONS IN: RNA binding, ribonuclease III activity; INVOLVED IN: RNA processing; LOCATED IN: chloroplast; CONTAINS InterPro DOMAIN/s: Ribonuclease III (InterPro:IPR000999); BEST Arabidopsis thaliana protein match is: Ribonuclease III family protein (TAIR:AT3G13740.1); Has 1541 Blast hits to 1540 proteins in 746 species: Archae …	143.859	71.0443	0.493847	-1.01786	1.36639e-07	5.72804e-06
LOC_Os01g29150	Similar to Cytochrome P450 monooxygenase CYP72A5 (Fragment).	BAS1	Cytochrome P450 superfamily protein \\ Encodes a member of the cytochrome p450 family that serves as a control point between multiple photoreceptor systems and brassinosteroid signal transduction. Involved in brassinolide metabolism. Mediates response to a variety of light signals including hypocotyl elongation and cotyledon expansion. \\ PHYB ACTIVATION TAGGED SUPPRESSOR 1 (BAS1); FUNCTIONS IN: …	141.918	66.0014	0.465066	-1.10449	1.22807e-08	6.46025e-07
LOC_Os02g08160		AT3G26922	F-box/RNI-like superfamily protein \\ F-box/RNI-like superfamily protein; FUNCTIONS IN: molecular_function unknown; INVOLVED IN: biological_process unknown; LOCATED IN: cellular_component unknown; CONTAINS InterPro DOMAIN/s: F-box domain, cyclin-like (InterPro:IPR001810), F-box domain, Skp2-like (InterPro:IPR022364), Leucine-rich repeat 2 (InterPro:IPR013101); BEST Arabidopsis thaliana protein ma…	140.957	64.602	0.458309	-1.12561	2.99118e-08	1.4599e-06
LOC_Os10g38940	Similar to Beta-ring hydroxylase (Fragment).	BETA-OHASE 1	beta-hydroxylase 1 \\ Converts beta-carotene to zeaxanthin via cryptoxanthin. \\ beta-hydroxylase 1 (BETA-OHASE 1); FUNCTIONS IN: carotene beta-ring hydroxylase activity; INVOLVED IN: xanthophyll biosynthetic process, carotene metabolic process; LOCATED IN: endoplasmic reticulum, chloroplast; EXPRESSED IN: 21 plant structures; EXPRESSED DURING: 13 growth stages; CONTAINS InterPro DOMAIN/s: Fatty …	139.023	40.3765	0.29043	-1.78374	3.1071e-11	2.69272e-09
LOC_Os06g09610	Similar to Peroxiredoxin Q (Fragment).	ATPRX Q	Thioredoxin superfamily protein \\ encodes periredoxin Q which decomposes peroxides and plays a role in the protection of the photosynthetic apparatus \\ ATPRX Q; FUNCTIONS IN: peroxiredoxin activity, antioxidant activity; INVOLVED IN: cell redox homeostasis; LOCATED IN: chloroplast stromal thylakoid, chloroplast thylakoid membrane, chloroplast, plastoglobule, chloroplast envelope; EXPRESSED IN: …	137.563	62.2748	0.4527	-1.14337	2.6957e-06	7.82072e-05
LOC_Os02g48430				134.144	36.3749	0.271164	-1.88276	4.59216e-18	8.99764e-16
LOC_Os09g26530	Peptidase cysteine/serine, trypsin-like domain containing protein.			133.187	53.8991	0.404688	-1.30512	4.23564e-05	0.000788756
LOC_Os01g10110	Similar to Cytokinin dehydrogenase 2.	CKX3	cytokinin oxidase 3 \\ It encodes a protein whose sequence is similar to cytokinin oxidase/dehydrogenase, which catalyzes the degradation of cytokinins. \\ cytokinin oxidase 3 (CKX3); FUNCTIONS IN: primary amine oxidase activity, cytokinin dehydrogenase activity; INVOLVED IN: cytokinin catabolic process; LOCATED IN: vacuole; EXPRESSED IN: 14 plant structures; EXPRESSED DURING: 6 growth stages; CO…	132.675	60.308	0.454554	-1.13748	3.29261e-06	9.29321e-05
LOC_Os11g30500	Similar to HVA22 protein.	HVA22E	HVA22 homologue E \\ Encodes one of five HVA22 homologs in Arabidopsis. HVA22 is an ABA- and stress-inducible gene first isolated from barley. Members of this gene family have only been found in eukaryotes. AtHVA22e mRNA is upregulated to varying degrees in response to cold stress, salt stress, ABA treatment or dehydration. \\ HVA22 homologue E (HVA22E); FUNCTIONS IN: molecular_function unknown; …	129.308	60.6156	0.468768	-1.09305	0.000419031	0.00518544
LOC_Os07g36460	Similar to Undeveloped tapetum 1.	AMS	basic helix-loop-helix (bHLH) DNA-binding superfamily protein \\ Encodes a basic helix-loop helix transcription factor involved in tapetal cell development. Loss of function mutations are male sterile. AMS binds to a region termed the E box of target gene promoters. \\ ABORTED MICROSPORES (AMS); FUNCTIONS IN: DNA binding, sequence-specific DNA binding transcription factor activity; INVOLVED IN: t…	123.948	52.1718	0.420916	-1.2484	9.24611e-09	4.98019e-07
LOC_Os06g21380	Peptidase S41 domain containing protein.	AT3G57680	Peptidase S41 family protein \\ Peptidase S41 family protein; FUNCTIONS IN: serine-type peptidase activity; INVOLVED IN: proteolysis, intracellular signaling pathway; LOCATED IN: chloroplast thylakoid lumen, membrane; EXPRESSED IN: 22 plant structures; EXPRESSED DURING: 13 growth stages; CONTAINS InterPro DOMAIN/s: Peptidase S41 (InterPro:IPR005151), PDZ/DHR/GLGF (InterPro:IPR001478), Peptidase S…	119.079	56.8771	0.477642	-1.066	7.70608e-07	2.66034e-05
LOC_Os01g66890	Zinc finger, TAZ-type domain containing protein.	BT4	BTB and TAZ domain protein 4 \\ BTB and TAZ domain protein. Located in cytoplasm and expressed in fruit, flower and leaves. \\ BTB and TAZ domain protein 4 (BT4); FUNCTIONS IN: transcription regulator activity; INVOLVED IN: response to auxin stimulus, response to gibberellin stimulus; LOCATED IN: plasma membrane, cytoplasm; EXPRESSED IN: 27 plant structures; EXPRESSED DURING: 15 growth stages; CO…	118.597	54.5386	0.459864	-1.12072	3.71788e-07	1.38278e-05
LOC_Os04g23550	Helix-loop-helix DNA-binding domain containing protein.	AT5G57150	basic helix-loop-helix (bHLH) DNA-binding superfamily protein \\ basic helix-loop-helix (bHLH) DNA-binding superfamily protein; FUNCTIONS IN: DNA binding, sequence-specific DNA binding transcription factor activity; INVOLVED IN: regulation of transcription; LOCATED IN: nucleus; EXPRESSED IN: 24 plant structures; EXPRESSED DURING: 14 growth stages; CONTAINS InterPro DOMAIN/s: Helix-loop-helix DNA-…	117.115	0.337042	0.00287788	-8.44078	0.0059832	0.0403039
LOC_Os05g44340	Similar to Heat shock protein 101.	HSP101	heat shock protein 101 \\ Encodes ClpB1, which belongs to the Casein lytic proteinase/heat shock protein 100 (Clp/Hsp100) family. Involved in refolding of proteins which form aggregates under heat stress. Also known as AtHsp101. AtHsp101 is a cytosolic heat shock protein required for acclimation to high temperature. \\ heat shock protein 101 (HSP101); FUNCTIONS IN: protein binding, ATPase activit…	116.674	54.8733	0.470312	-1.08831	2.82271e-05	0.000558735
LOC_Os03g47050	Conserved hypothetical protein.			116.175	49.1257	0.422859	-1.24175	4.36585e-08	2.06018e-06
LOC_Os05g42000	Haem peroxidase family protein.	RCI3	Peroxidase superfamily protein \\ Encodes a cold-inducible cationic peroxidase that is involved in the stress response. In response to low temperature, RCI3 transcripts accumulate in the aerial part and in roots of etiolated seedlings but only in roots of light-grown seedlings. \\ RARE COLD INDUCIBLE GENE 3 (RCI3); FUNCTIONS IN: peroxidase activity; INVOLVED IN: response to desiccation, response …	112.763	56.2006	0.498394	-1.00464	6.8968e-06	0.000172191
LOC_Os08g33820	Similar to LHC I type IV chlorophyll binding protein (Fragment).	LHCA4	light-harvesting chlorophyll-protein complex I subunit A4 \\ Encodes a chlorophyll a/b-binding protein that is more similar to the PSI Cab proteins than the PSII cab proteins. The predicted protein is about 20 amino acids shorter than most known Cab proteins. \\ light-harvesting chlorophyll-protein complex I subunit A4 (LHCA4); FUNCTIONS IN: chlorophyll binding; INVOLVED IN: response to karrikin,…	112.287	34.0067	0.302857	-1.72329	7.69425e-10	5.14963e-08
LOC_Os08g37070	Conserved hypothetical protein.			112.265	49.8166	0.44374	-1.17221	0.00504595	0.0356234
LOC_Os05g33670		AT3G23160	Protein of unknown function (DUF668) \\ Protein of unknown function (DUF668); CONTAINS InterPro DOMAIN/s: Protein of unknown function DUF668 (InterPro:IPR007700), Protein of unknown function DUF3475 (InterPro:IPR021864); BEST Arabidopsis thaliana protein match is: Protein of unknown function (DUF668) (TAIR:AT5G04550.1); Has 431 Blast hits to 290 proteins in 19 species: Archae - 0; Bacteria - 1; M…	111.791	52.8515	0.47277	-1.08079	1.79348e-06	5.52952e-05
LOC_Os02g46690	Cyclin-like F-box domain containing protein.	AT5G41840	F-box/RNI-like superfamily protein \\ F-box/RNI-like superfamily protein; CONTAINS InterPro DOMAIN/s: F-box domain, cyclin-like (InterPro:IPR001810), F-box domain, Skp2-like (InterPro:IPR022364), FBD-like (InterPro:IPR006566), Leucine-rich repeat 2 (InterPro:IPR013101); BEST Arabidopsis thaliana protein match is: F-box/RNI-like superfamily protein (TAIR:AT4G00320.1); Has 1807 Blast hits to 1807 p…	108.389	52.201	0.481606	-1.05407	5.24355e-06	0.00013827
LOC_Os12g34062		ATMG00980.1	Ribosomal protein S12/S23 family protein \\ ribosomal protein L2 \\ RPSL2; FUNCTIONS IN: structural constituent of ribosome; INVOLVED IN: translation; LOCATED IN: mitochondrial large ribosomal subunit; CONTAINS InterPro DOMAIN/s: Ribosomal protein S12/S23 (InterPro:IPR006032), Nucleic acid-binding, OB-fold (InterPro:IPR012340), Nucleic acid-binding, OB-fold-like (InterPro:IPR016027), Ribosomal pr…	106.435	27.2837	0.256341	-1.96386	1.17208e-08	6.1898e-07
LOC_Os04g37580	Hypothetical protein.	AT1G44790	ChaC-like family protein \\ ChaC-like family protein; CONTAINS InterPro DOMAIN/s: ChaC-like protein (InterPro:IPR006840); BEST Arabidopsis thaliana protein match is: ChaC-like family protein (TAIR:AT4G31290.1); Has 1621 Blast hits to 1621 proteins in 610 species: Archae - 0; Bacteria - 916; Metazoa - 235; Fungi - 131; Plants - 128; Viruses - 0; Other Eukaryotes - 211 (source: NCBI BLink).	104.99	43.75	0.416707	-1.2629	6.75922e-08	3.03089e-06
LOC_Os01g09770	Conserved hypothetical protein.	AT3G11760	unknown protein; FUNCTIONS IN: molecular_function unknown; INVOLVED IN: biological_process unknown; LOCATED IN: cellular_component unknown; EXPRESSED IN: 23 plant structures; EXPRESSED DURING: 14 growth stages; BEST Arabidopsis thaliana protein match is: unknown protein (TAIR:AT5G04860.1); Has 84 Blast hits to 73 proteins in 13 species: Archae - 0; Bacteria - 0; Metazoa - 0; Fungi - 0; Plants - 8…	104.018	45.132	0.433887	-1.20461	1.38315e-07	5.78036e-06
LOC_Os02g15930	Conserved hypothetical protein.			103.051	45.4534	0.441078	-1.18089	6.74687e-07	2.36613e-05
LOC_Os10g34602	Conserved hypothetical protein.			101.103	49.8542	0.493105	-1.02003	8.1785e-06	0.000197093
LOC_Os04g54240	Similar to H0315F07.12 protein.	AT4G10270	Wound-responsive family protein \\ Wound-responsive family protein; CONTAINS InterPro DOMAIN/s: Protein of unknown function wound-induced (InterPro:IPR022251); BEST Arabidopsis thaliana protein match is: Wound-responsive family protein (TAIR:AT4G10265.1); Has 183 Blast hits to 182 proteins in 16 species: Archae - 0; Bacteria - 0; Metazoa - 0; Fungi - 0; Plants - 183; Viruses - 0; Other Eukaryotes…	101.095	24.5417	0.242759	-2.0424	0.0011107	0.0111478
LOC_Os04g35560	Glutathione S-transferase, C-terminal-like domain containing protein.	AT1G77290	Glutathione S-transferase family protein \\ Glutathione S-transferase family protein; INVOLVED IN: pentachlorophenol catabolic process; LOCATED IN: plasma membrane; CONTAINS InterPro DOMAIN/s: Thioredoxin fold (InterPro:IPR012335), Glutathione S-transferase, C-terminal (InterPro:IPR004046), Glutathione S-transferase, C-terminal-like (InterPro:IPR010987), Glutathione S-transferase/chloride channel…	99.6301	44.4488	0.446138	-1.16444	2.00945e-06	6.0505e-05
LOC_Os04g31790	Similar to OSIGBa0075F02.1 protein.			99.1659	25.5692	0.257843	-1.95544	0.00195333	0.0172264
LOC_Os02g42585	Pathogenesis-related transcriptional factor and ERF domain containing protein.	AT2G20880	Integrase-type DNA-binding superfamily protein \\ Integrase-type DNA-binding superfamily protein; FUNCTIONS IN: DNA binding, sequence-specific DNA binding transcription factor activity; INVOLVED IN: regulation of transcription, DNA-dependent; LOCATED IN: nucleus, cytoplasm; EXPRESSED IN: stamen; EXPRESSED DURING: 4 anthesis, petal differentiation and expansion stage; CONTAINS InterPro DOMAIN/s: D…	98.648	27.2762	0.2765	-1.85465	1.39214e-08	7.19735e-07
LOC_Os12g08090	Similar to Amino acid carrier (Fragment).	AAP3	amino acid permease 3 \\ Amino acid permease which transports basic amino acids. \\ amino acid permease 3 (AAP3); CONTAINS InterPro DOMAIN/s: Amino acid transporter, transmembrane (InterPro:IPR013057); BEST Arabidopsis thaliana protein match is: amino acid permease 2 (TAIR:AT5G09220.1); Has 2346 Blast hits to 2332 proteins in 227 species: Archae - 0; Bacteria - 15; Metazoa - 394; Fungi - 322; Pla…	96.2121	38.3635	0.398739	-1.32648	1.51461e-05	0.00033107
LOC_Os01g43844	Cytochrome P450.	CYP72A15	cytochrome P450, family 72, subfamily A, polypeptide 15 \\ putative cytochrome P450 \\ cytochrome P450, family 72, subfamily A, polypeptide 15 (CYP72A15); FUNCTIONS IN: electron carrier activity, monooxygenase activity, iron ion binding, oxygen binding, heme binding; INVOLVED IN: response to cyclopentenone; LOCATED IN: endomembrane system; EXPRESSED IN: 22 plant structures; EXPRESSED DURING: 13 g…	93.3269	33.6454	0.360512	-1.47188	1.03835e-08	5.53767e-07
LOC_Os08g02070	Similar to TAGL12 transcription factor.	AGL12	AGAMOUS-like 12 \\ Encodes a member of the MADS box family of transcription factors. Involved in root cell differentiation and flowering time. Loss of function mutations have abnormal cellular differentiation in the roots and are late flowering. AGL12 along with AGL14, and AGL17 is preferentially expressed in root tissues and represent the only characterized MADS box genes expressed in roots. \\ …	92.829	38.1013	0.410446	-1.28473	0.000118978	0.0018693
LOC_Os03g14270	Similar to LOB domain protein 16.	JLO	Lateral organ boundaries (LOB) domain family protein \\ Encodes a protein containing a LOB domain that is expressed in embryos, flower primordium and lateral floral organ boundaries. Overexpression is correlated with activation of STM and KNAT1 and down regulation of PIN1 and reduced auxin transport levels. Ectopic expression in plants results in premature termination of the shoot apical meristem…	92.356	35.7199	0.386763	-1.37048	3.54555e-07	1.32414e-05
LOC_Os06g46950	Similar to EF-hand Ca2 -binding protein CCD1.	AT4G27280	Calcium-binding EF-hand family protein \\ Calcium-binding EF-hand family protein; FUNCTIONS IN: calcium ion binding; INVOLVED IN: response to karrikin; EXPRESSED IN: 23 plant structures; EXPRESSED DURING: 13 growth stages; CONTAINS InterPro DOMAIN/s: EF-Hand 1, calcium-binding site (InterPro:IPR018247), EF-HAND 2 (InterPro:IPR018249), EF-hand-like domain (InterPro:IPR011992); BEST Arabidopsis tha…	91.8456	17.5143	0.190693	-2.39068	0.000152874	0.00228121
LOC_Os10g22050	Conserved hypothetical protein.			91.8444	39.7399	0.432688	-1.2086	9.53675e-06	0.00022423
LOC_Os01g09220	Similar to cDNA clone:001-117-G12, full insert sequence.	AT5G12010	unknown protein; INVOLVED IN: response to salt stress; LOCATED IN: chloroplast, plasma membrane, membrane; EXPRESSED IN: 23 plant structures; EXPRESSED DURING: 13 growth stages; BEST Arabidopsis thaliana protein match is: unknown protein (TAIR:AT4G29780.1); Has 1807 Blast hits to 1807 proteins in 277 species: Archae - 0; Bacteria - 0; Metazoa - 736; Fungi - 347; Plants - 385; Viruses - 0; Other E…	91.3377	3.02992	0.0331727	-4.91386	0.00604787	0.0405979
LOC_Os11g10590	Similar to Specific abundant protein-like protein 1.			89.4271	34.9775	0.391128	-1.35429	7.48711e-06	0.00018404
LOC_Os04g08600	Hypothetical conserved gene.	SUP	C2H2 and C2HC zinc fingers superfamily protein \\ Flower-specific gene controlling the boundary of the stamen and carpel whorls. Similar to zinc finger transcription factors. \\ SUPERMAN (SUP); FUNCTIONS IN: DNA binding, sequence-specific DNA binding transcription factor activity, zinc ion binding, nucleic acid binding; INVOLVED IN: flower development, negative regulation of transcription, specif…	87.0037	30.285	0.348088	-1.52247	1.64242e-09	1.00914e-07
LOC_Os02g53169	Conserved hypothetical protein.			84.5677	38.7216	0.457876	-1.12697	2.77789e-05	0.000551885
LOC_Os03g08090	Hypothetical conserved gene.	AT5G21950	alpha/beta-Hydrolases superfamily protein \\ alpha/beta-Hydrolases superfamily protein; CONTAINS InterPro DOMAIN/s: Alpha/beta hydrolase fold-1 (InterPro:IPR000073); BEST Arabidopsis thaliana protein match is: alpha/beta-Hydrolases superfamily protein (TAIR:AT4G33180.1); Has 30201 Blast hits to 17322 proteins in 780 species: Archae - 12; Bacteria - 1396; Metazoa - 17338; Fungi - 3422; Plants - 50…	84.096	37.3487	0.44412	-1.17098	2.63732e-06	7.67606e-05
LOC_Os03g06360	Similar to Rab28 protein.	AT3G22490	Seed maturation protein \\ Seed maturation protein; CONTAINS InterPro DOMAIN/s: Seed maturation protein (InterPro:IPR007011); BEST Arabidopsis thaliana protein match is: Seed maturation protein (TAIR:AT3G22500.1); Has 198 Blast hits to 183 proteins in 40 species: Archae - 2; Bacteria - 41; Metazoa - 7; Fungi - 0; Plants - 144; Viruses - 3; Other Eukaryotes - 1 (source: NCBI BLink).	84.0898	39.1051	0.465039	-1.10458	5.86325e-06	0.000152146
LOC_Os02g06320	Hypothetical conserved gene.	MCT1	MEI2 C-terminal RRM only like 1 \\ a member of mei2-like gene family; phylogenetic analysis revealed that it belongs to the fourth clade of mei2-like proteins, with conserved C-terminal RNA recognition motif (RRM) only. \\ MEI2 C-terminal RRM only like 1 (MCT1); CONTAINS InterPro DOMAIN/s: RNA recognition motif 2 (InterPro:IPR007201); BEST Arabidopsis thaliana protein match is: terminal EAR1-like…	84.0823	40.4333	0.480878	-1.05626	7.87994e-05	0.00133416
LOC_Os07g05480	Photosystem I protein-like protein.	PSAK	photosystem I subunit K \\ Encodes subunit K of photosystem I reaction center. \\ photosystem I subunit K (PSAK); FUNCTIONS IN: molecular_function unknown; INVOLVED IN: photosynthesis; LOCATED IN: thylakoid, chloroplast thylakoid membrane, photosystem I, chloroplast, membrane; EXPRESSED IN: 23 plant structures; EXPRESSED DURING: 13 growth stages; CONTAINS InterPro DOMAIN/s: Photosystem I PsaG/Psa…	82.148	31.614	0.384841	-1.37766	3.64738e-05	0.000697465
LOC_Os07g47080	Hypothetical conserved gene.			81.1684	30.6668	0.377816	-1.40424	1.77163e-08	9.00432e-07
LOC_Os05g51110	Paired amphipathic helix domain containing protein.	SNL3	SIN3-like 3 \\ Enhances AtERF7-mediated transcriptional repression. RNAi lines show ABA hypersensitivity. Interacts with ERF7 and HDA19. \\ SIN3-like 3 (SNL3); FUNCTIONS IN: transcription repressor activity; INVOLVED IN: negative regulation of transcription, regulation of transcription, DNA-dependent, response to abscisic acid stimulus; LOCATED IN: nucleus; EXPRESSED IN: 22 plant structures; EXPR…	80.6917	27.6158	0.342239	-1.54693	2.1925e-05	0.000451508
LOC_Os10g30719	Homeodomain-like containing protein.	TRFL8	TRF-like 8 \\ TRF-like 8 (TRFL8); FUNCTIONS IN: DNA binding; INVOLVED IN: regulation of transcription; CONTAINS InterPro DOMAIN/s: SANT, DNA-binding (InterPro:IPR001005), Homeodomain-like (InterPro:IPR009057), HTH transcriptional regulator, Myb-type, DNA-binding (InterPro:IPR017930), Homeodomain-related (InterPro:IPR012287); BEST Arabidopsis thaliana protein match is: TRF-like 6 (TAIR:AT1G72650.2…	80.21	35.0474	0.436946	-1.19447	7.23488e-06	0.000179307
LOC_Os04g38390	Similar to TMV induced protein 1-2.	AT4G39730	Lipase/lipooxygenase, PLAT/LH2 family protein \\ Lipase/lipooxygenase, PLAT/LH2 family protein; FUNCTIONS IN: molecular_function unknown; INVOLVED IN: biological_process unknown; LOCATED IN: thylakoid, chloroplast thylakoid membrane, plasma membrane, chloroplast, vacuole; EXPRESSED IN: 25 plant structures; EXPRESSED DURING: 13 growth stages; CONTAINS InterPro DOMAIN/s: Lipoxygenase, LH2 (InterPro…	79.2192	33.6945	0.425333	-1.23334	1.97918e-06	5.98602e-05
LOC_Os12g38640	Protein of unknown function DUF1118 domain containing protein.	AT5G08050	Protein of unknown function (DUF1118) \\ FUNCTIONS IN: molecular_function unknown; INVOLVED IN: response to karrikin; LOCATED IN: thylakoid, chloroplast thylakoid membrane, chloroplast; EXPRESSED IN: 21 plant structures; EXPRESSED DURING: 13 growth stages; CONTAINS InterPro DOMAIN/s: Protein of unknown function DUF1118 (InterPro:IPR009500), Uncharacterised conserved protein UCP022207 (InterPro:IP…	78.7549	33.9835	0.431509	-1.21254	0.000156726	0.00232331
LOC_Os10g36620	Conserved hypothetical protein.			78.2683	37.7284	0.48204	-1.05278	5.90557e-05	0.00105053
LOC_Os02g46980	Similar to Selenium-binding protein-like.	AT1G31920	Tetratricopeptide repeat (TPR)-like superfamily protein \\ Tetratricopeptide repeat (TPR)-like superfamily protein; CONTAINS InterPro DOMAIN/s: Pentatricopeptide repeat (InterPro:IPR002885); BEST Arabidopsis thaliana protein match is: Tetratricopeptide repeat (TPR)-like superfamily protein (TAIR:AT5G66520.1); Has 36071 Blast hits to 13961 proteins in 258 species: Archae - 0; Bacteria - 3; Metazoa…	77.2874	35.9966	0.46575	-1.10237	0.000493255	0.00588836
LOC_Os05g34450	Similar to LOB domain protein 6 (ASYMMETRIC LEAVES2).	AS2	Lateral organ boundaries (LOB) domain family protein \\ required for formation of a symmetric flat leaf lamina, encodes a member of a family of proteins characterized by cysteine repeats and a leucine zipper; involved in KNOX gene regulation. Acts together with ASL1 in proximal-distal symmetry determination. Forms a complex with AS1 that binds to the BP promoter and leads to silencing of BP. \\ A…	77.2861	35.3755	0.457721	-1.12746	1.30682e-05	0.000292508
LOC_Os01g52594	Similar to H0402C08.3 protein.			74.336	28.2718	0.380325	-1.3947	0.00583579	0.0395299
LOC_Os06g48180	Similar to Xyloglucan endo-transglycosylase homolog.	XTH25	xyloglucan endotransglucosylase/hydrolase 25 \\ xyloglucan endotransglycosylase-related protein (XTR3) \\ xyloglucan endotransglucosylase/hydrolase 25 (XTH25); FUNCTIONS IN: hydrolase activity, acting on glycosyl bonds, xyloglucan:xyloglucosyl transferase activity; INVOLVED IN: plant-type cell wall biogenesis; LOCATED IN: endomembrane system, cell wall, apoplast; EXPRESSED IN: 9 plant structures;…	71.9064	30.6778	0.426636	-1.22892	0.00523239	0.0365861
LOC_Os11g06240	Hypothetical gene.	AT1G01170	Protein of unknown function (DUF1138) \\ Protein of unknown function (DUF1138); FUNCTIONS IN: molecular_function unknown; INVOLVED IN: response to stress; LOCATED IN: mitochondrion, membrane; EXPRESSED IN: 23 plant structures; EXPRESSED DURING: 13 growth stages; CONTAINS InterPro DOMAIN/s: Protein of unknown function DUF1138 (InterPro:IPR009515); BEST Arabidopsis thaliana protein match is: Protei…	70.9754	26.2493	0.369837	-1.43504	1.95735e-06	5.93328e-05
LOC_Os02g20500	Transposase (putative), gypsy type domain containing protein.			70.4875	30.6414	0.434707	-1.20188	3.23852e-05	0.000629183
LOC_Os05g06710	Lipase, GDSL domain containing protein.	AT1G56670	GDSL-like Lipase/Acylhydrolase superfamily protein \\ GDSL-like Lipase/Acylhydrolase superfamily protein; FUNCTIONS IN: hydrolase activity, acting on ester bonds, carboxylesterase activity; INVOLVED IN: lipid metabolic process; LOCATED IN: endomembrane system; EXPRESSED IN: 10 plant structures; EXPRESSED DURING: 6 growth stages; CONTAINS InterPro DOMAIN/s: Lipase, GDSL (InterPro:IPR001087); BEST …	70.4688	29.3013	0.415805	-1.26602	9.92732e-06	0.000231401
LOC_Os06g39330	UDP-glucuronosyl/UDP-glucosyltransferase family protein.	IAGLU	indole-3-acetate beta-D-glucosyltransferase \\ UDP-glucose:indole-3-acetate beta-D-glucosyltransferase \\ indole-3-acetate beta-D-glucosyltransferase (IAGLU); FUNCTIONS IN: UDP-glycosyltransferase activity, transferase activity, transferring glycosyl groups; INVOLVED IN: metabolic process; LOCATED IN: chloroplast; EXPRESSED IN: 17 plant structures; EXPRESSED DURING: 7 growth stages; CONTAINS Inte…	69.9883	32.0202	0.457508	-1.12813	0.00017378	0.00252219
LOC_Os04g33330	Conserved hypothetical protein.			69.9858	34.3734	0.491148	-1.02577	0.000196118	0.00278998
LOC_Os10g17489		AT3G02100	UDP-Glycosyltransferase superfamily protein \\ UDP-Glycosyltransferase superfamily protein; FUNCTIONS IN: UDP-glycosyltransferase activity, transferase activity, transferring glycosyl groups; INVOLVED IN: metabolic process; LOCATED IN: cellular_component unknown; EXPRESSED IN: root; CONTAINS InterPro DOMAIN/s: UDP-glucuronosyl/UDP-glucosyltransferase (InterPro:IPR002213); BEST Arabidopsis thalian…	69.5166	27.2868	0.392522	-1.34916	2.32283e-06	6.87168e-05
LOC_Os11g31570	BRO1 domain domain containing protein.	AT5G14020	Endosomal targeting BRO1-like domain-containing protein \\ Endosomal targeting BRO1-like domain-containing protein; INVOLVED IN: N-terminal protein myristoylation; LOCATED IN: vacuole; EXPRESSED IN: root; CONTAINS InterPro DOMAIN/s: BRO1 (InterPro:IPR004328); BEST Arabidopsis thaliana protein match is: Endosomal targeting BRO1-like domain-containing protein (TAIR:AT1G73390.3); Has 94 Blast hits t…	68.0503	31.9822	0.469979	-1.08933	0.000113963	0.00181154
LOC_Os05g46760	Serine/threonine protein kinase domain containing protein.	MAPKKK15	mitogen-activated protein kinase kinase kinase 15 \\ member of MEKK subfamily \\ mitogen-activated protein kinase kinase kinase 15 (MAPKKK15); FUNCTIONS IN: protein serine/threonine kinase activity, protein kinase activity, kinase activity, ATP binding; INVOLVED IN: protein amino acid phosphorylation; LOCATED IN: cellular_component unknown; CONTAINS InterPro DOMAIN/s: Protein kinase, ATP binding …	66.5865	31.3174	0.470326	-1.08827	0.000235903	0.00322966
LOC_Os03g53640	Similar to photosystem II 11 kDa protein-related.	LPA19	photosystem II 11 kDa protein-related \\ Encodes a Psb27 homolog involved in photosystem II biogenesis. \\ LOW PSII ACCUMULATION 19 (LPA19); FUNCTIONS IN: molecular_function unknown; INVOLVED IN: photosystem II assembly; LOCATED IN: chloroplast thylakoid lumen, chloroplast; EXPRESSED IN: 24 plant structures; EXPRESSED DURING: 15 growth stages; Has 214 Blast hits to 214 proteins in 55 species: Arc…	65.1514	28.9314	0.444064	-1.17116	5.91114e-05	0.00105083
LOC_Os02g45710	Zinc finger, RING/FYVE/PHD-type domain containing protein.	BRH1	brassinosteroid-responsive RING-H2 \\ Encodes a novel ring finger protein and forms an N-terminal hydrophobic domain and a C-terminal RING-H2 signature. Expression is down regulated by brassinolide. \\ brassinosteroid-responsive RING-H2 (BRH1); FUNCTIONS IN: zinc ion binding; INVOLVED IN: response to brassinosteroid stimulus, response to chitin; LOCATED IN: endomembrane system; EXPRESSED IN: 22 p…	65.1451	21.5577	0.330918	-1.59545	6.82631e-05	0.00118546
LOC_Os01g08180	BZR1, transcriptional repressor domain containing protein.	BES1	Brassinosteroid signalling positive regulator (BZR1) family protein \\ Encodes brassinosteroid (BR) signalling protein that accumulates in the nucleus as dephosphorylated form in response to BRs. Is phosphorylated by the BIN2 GSK3 kinase. It synergistically interacts with BIM1 to bind to E box sequences (CANNTG). The protein contains a nuclear localization signal (NLS), followed by a highly conse…	64.6422	25.6247	0.396408	-1.33494	1.24162e-05	0.000280001
LOC_Os01g09720	Cytochrome P450 domain containing protein.	ATCG00350.1	Photosystem I, PsaA/PsaB protein \\ Encodes psaA protein comprising the reaction center for photosystem I along with psaB protein; hydrophobic protein encoded by the chloroplast genome. \\ PSAA; FUNCTIONS IN: chlorophyll binding; INVOLVED IN: photosynthesis; LOCATED IN: in 6 components; EXPRESSED IN: 24 plant structures; EXPRESSED DURING: 13 growth stages; CONTAINS InterPro DOMAIN/s: Photosystem …	63.6801	31.0021	0.486841	-1.03848	0.00111543	0.0111911
LOC_Os07g39810	Similar to triacylglycerol lipase.	AT5G50890	alpha/beta-Hydrolases superfamily protein \\ alpha/beta-Hydrolases superfamily protein; BEST Arabidopsis thaliana protein match is: alpha/beta-Hydrolases superfamily protein (TAIR:AT2G05260.1); Has 209 Blast hits to 209 proteins in 14 species: Archae - 0; Bacteria - 0; Metazoa - 0; Fungi - 0; Plants - 209; Viruses - 0; Other Eukaryotes - 0 (source: NCBI BLink).	63.6576	27.9612	0.439244	-1.18691	0.000636331	0.00722296
LOC_Os09g20090	L-ascorbate oxidase precursor (EC 1.10.3.3) (Ascorbase) (ASO).	AT4G39830	Cupredoxin superfamily protein \\ Cupredoxin superfamily protein; FUNCTIONS IN: oxidoreductase activity, L-ascorbate oxidase activity, copper ion binding; INVOLVED IN: oxidation reduction; LOCATED IN: endomembrane system, extracellular region; EXPRESSED IN: 19 plant structures; EXPRESSED DURING: 12 growth stages; CONTAINS InterPro DOMAIN/s: Multicopper oxidase, type 3 (InterPro:IPR011707), Multic…	63.1634	30.9838	0.490533	-1.02758	0.00470256	0.0336816
LOC_Os03g45710	Similar to Ferredoxin.	AT4G14890	2Fe-2S ferredoxin-like superfamily protein \\ 2Fe-2S ferredoxin-like superfamily protein; FUNCTIONS IN: electron carrier activity, iron-sulfur cluster binding, 2 iron, 2 sulfur cluster binding; INVOLVED IN: electron transport chain; LOCATED IN: chloroplast; EXPRESSED IN: 23 plant structures; EXPRESSED DURING: 13 growth stages; CONTAINS InterPro DOMAIN/s: Ferredoxin (InterPro:IPR001041), Ferredoxi…	62.225	28.927	0.464877	-1.10508	0.000110972	0.00177489
LOC_Os05g11380		AG	K-box region and MADS-box transcription factor family protein \\ Floral homeotic gene encoding a MADS domain transcription factor. Specifies floral meristem and carpel and stamen identity. Binds CArG box sequences. It is the only C function gene. It interacts genetically with the other homeotic genes to specify the floral organs. \\ AGAMOUS (AG); FUNCTIONS IN: DNA binding, sequence-specific DNA b…	61.2329	14.1219	0.230626	-2.11637	5.66146e-10	3.93648e-08
LOC_Os10g21190				60.267	25.5809	0.42446	-1.2363	4.87409e-05	0.000892889
LOC_Os02g55610	Similar to serine-rich protein.	AT5G11090	serine-rich protein-related \\ serine-rich protein-related; BEST Arabidopsis thaliana protein match is: serine-rich protein-related (TAIR:AT5G25280.2); Has 1807 Blast hits to 1807 proteins in 277 species: Archae - 0; Bacteria - 0; Metazoa - 736; Fungi - 347; Plants - 385; Viruses - 0; Other Eukaryotes - 339 (source: NCBI BLink).	60.2595	18.501	0.307021	-1.70359	7.83115e-05	0.00132923
LOC_Os01g70860	Probable esterase PIR7A.	MES1	methyl esterase 1 \\ Encodes a protein shown to have carboxylesterase activity, methyl salicylate esterase activity, methyl jasmonate esterase activity, and methyl IAA esterase activity in vitro. MES1 appears to be involved in MeSA hydrolysis in planta. Expression of MES1 can restore systemic acquired resistance in SAR-deficient tobacco plants. This protein does not act on MeGA4, or MEGA9 in vitr…	59.7866	29.3458	0.490842	-1.02667	0.000913474	0.00954818
LOC_Os01g57599	Hypothetical protein.	AT2G12490	transposable element gene \\ copia-like retrotransposon family, has a 0. P-value blast match to GB:CAA31653 polyprotein (Ty1_Copia-element) (Arabidopsis thaliana)	59.7703	25.9254	0.433751	-1.20506	0.00422041	0.0311196
LOC_Os06g21590	Similar to Light-harvesting complex I (Fragment).	LHCA1	photosystem I light harvesting complex gene 1 \\ Encodes a component of the light harvesting complex associated with photosystem I. \\ photosystem I light harvesting complex gene 1 (LHCA1); FUNCTIONS IN: chlorophyll binding; INVOLVED IN: response to blue light, response to red light, photosynthesis, light harvesting in photosystem I, response to far red light, photosynthesis; LOCATED IN: in 7 com…	59.2986	15.1737	0.255887	-1.96642	6.94439e-07	2.43225e-05
LOC_Os07g06880	Lipase, GDXG, active site domain containing protein.	AT5G06570	alpha/beta-Hydrolases superfamily protein \\ alpha/beta-Hydrolases superfamily protein; FUNCTIONS IN: hydrolase activity; INVOLVED IN: metabolic process; LOCATED IN: cellular_component unknown; EXPRESSED IN: 6 plant structures; EXPRESSED DURING: petal differentiation and expansion stage; CONTAINS InterPro DOMAIN/s: Alpha/beta hydrolase fold-3 (InterPro:IPR013094); BEST Arabidopsis thaliana protei…	57.3631	27.9476	0.487205	-1.0374	0.000612144	0.00700752
LOC_Os06g02230	Transcriptional factor B3 family protein.			57.3506	24.2517	0.422867	-1.24172	8.10149e-05	0.00136314
LOC_Os02g50174	Similar to EFA27 for EF hand, abscisic acid, 27kD.	AT1G70680	Caleosin-related family protein \\ Caleosin-related family protein; CONTAINS InterPro DOMAIN/s: Caleosin related (InterPro:IPR007736); BEST Arabidopsis thaliana protein match is: Caleosin-related family protein (TAIR:AT1G70670.1); Has 342 Blast hits to 337 proteins in 61 species: Archae - 0; Bacteria - 0; Metazoa - 0; Fungi - 58; Plants - 281; Viruses - 0; Other Eukaryotes - 3 (source: NCBI BLink…	56.3797	21.2364	0.376667	-1.40864	7.48571e-06	0.00018404
LOC_Os03g13984				55.9018	24.9077	0.445562	-1.1663	0.000227015	0.0031446
LOC_Os12g09620	Protein of unknown function DUF538 family protein.	AT1G02816	Protein of unknown function, DUF538 \\ Protein of unknown function, DUF538; FUNCTIONS IN: molecular_function unknown; INVOLVED IN: biological_process unknown; LOCATED IN: plasma membrane, vacuole; EXPRESSED IN: 25 plant structures; EXPRESSED DURING: 14 growth stages; CONTAINS InterPro DOMAIN/s: Protein of unknown function DUF538 (InterPro:IPR007493); BEST Arabidopsis thaliana protein match is: Pr…	55.8968	26.6183	0.476205	-1.07034	0.000601318	0.00691579
LOC_Os06g47940	Similar to Nitrogen fixation like protein.	NFU3	NFU domain protein 3 \\ Encodes a protein containing the NFU domain that may be involved in iron-sulfur cluster assembly. Part of a five member gene family, more closely related to NFU1 and 2 than to NFU4 and 5. Targeted to the chloroplast. \\ NFU domain protein 3 (NFU3); CONTAINS InterPro DOMAIN/s: NIF system FeS cluster assembly, NifU, C-terminal (InterPro:IPR001075); BEST Arabidopsis thaliana …	55.8931	27.615	0.494068	-1.01722	0.00194396	0.0171718
LOC_Os09g20940	Hypothetical conserved gene.			54.9284	25.8961	0.471451	-1.08482	0.000703046	0.00776856
LOC_Os01g20830	Similar to Hydrogenase expression/formation protein hypB.	AT3G56891	Heavy metal transport/detoxification superfamily protein \\ Heavy metal transport/detoxification superfamily protein ; FUNCTIONS IN: metal ion binding; INVOLVED IN: metal ion transport; LOCATED IN: cellular_component unknown; CONTAINS InterPro DOMAIN/s: Heavy metal transport/detoxification protein (InterPro:IPR006121), Heavy-metal-associated, conserved site (InterPro:IPR017969); BEST Arabidopsis …	54.428	11.7871	0.216563	-2.20714	1.51673e-06	4.7854e-05
LOC_Os07g46950	Glucose/ribitol dehydrogenase family protein.	AT3G26770	NAD(P)-binding Rossmann-fold superfamily protein \\ NAD(P)-binding Rossmann-fold superfamily protein; FUNCTIONS IN: oxidoreductase activity, binding, catalytic activity; INVOLVED IN: oxidation reduction, metabolic process; EXPRESSED IN: 6 plant structures; EXPRESSED DURING: 4 anthesis, F mature embryo stage, E expanded cotyledon stage; CONTAINS InterPro DOMAIN/s: NAD(P)-binding domain (InterPro:I…	53.4696	18.8668	0.352851	-1.50287	0.00115475	0.0115045
LOC_Os06g36080	Similar to kinesin motor protein-related.	AT1G73860	P-loop containing nucleoside triphosphate hydrolases superfamily protein \\ P-loop containing nucleoside triphosphate hydrolases superfamily protein; FUNCTIONS IN: microtubule motor activity, ATP binding; INVOLVED IN: microtubule-based movement; LOCATED IN: chloroplast; EXPRESSED IN: petal, sepal, male gametophyte, flower, pollen tube; EXPRESSED DURING: L mature pollen stage, M germinated pollen …	53.4621	23.9002	0.44705	-1.16149	0.000380939	0.00478634
LOC_Os02g10390	Chlorophyll a/b-binding protein type III (Fragment).	LHCA3	photosystem I light harvesting complex gene 3 \\ PSI type III chlorophyll a/b-binding protein (Lhca3*1) \\ photosystem I light harvesting complex gene 3 (LHCA3); FUNCTIONS IN: chlorophyll binding; INVOLVED IN: photosynthesis, light harvesting, photosynthesis; LOCATED IN: in 6 components; EXPRESSED IN: 24 plant structures; EXPRESSED DURING: 15 growth stages; CONTAINS InterPro DOMAIN/s: Chlorophyll…	52.9929	18.4952	0.349013	-1.51865	0.000476522	0.00574439
LOC_Os06g44040	Similar to DOMON domain-containing protein / dopamine beta-monooxygenase N-terminal domain-containing protein.	AT5G54830	DOMON domain-containing protein / dopamine beta-monooxygenase N-terminal domain-containing protein \\ DOMON domain-containing protein / dopamine beta-monooxygenase N-terminal domain-containing protein; FUNCTIONS IN: dopamine beta-monooxygenase activity, monooxygenase activity; INVOLVED IN: histidine catabolic process, metabolic process; LOCATED IN: endomembrane system, integral to membrane; EXPRE…	52.9779	12.1459	0.229263	-2.12492	6.60602e-08	2.96711e-06
LOC_Os03g07960		AT2G26340	unknown protein; FUNCTIONS IN: molecular_function unknown; INVOLVED IN: biological_process unknown; LOCATED IN: chloroplast thylakoid membrane, chloroplast thylakoid lumen, chloroplast; EXPRESSED IN: 22 plant structures; EXPRESSED DURING: 13 growth stages; Has 38 Blast hits to 38 proteins in 13 species: Archae - 0; Bacteria - 0; Metazoa - 0; Fungi - 0; Plants - 38; Viruses - 0; Other Eukaryotes -…	52.9742	21.1872	0.399954	-1.3221	5.74227e-05	0.00102825
LOC_Os01g55510	Similar to Dynein light chain.	ROPGEF11	RHO guanyl-nucleotide exchange factor 11 \\ Encodes a member of KPP-like gene family, homolog of KPP (kinase partner protein) gene in tomato. Also a member of the RopGEF (guanine nucleotide exchange factor) family, containing the novel PRONE domain (plant-specific Rop nucleotide exchanger), which is exclusively active towards members of the Rop subfamily . \\ RHO guanyl-nucleotide exchange factor…	52.9679	21.5535	0.406916	-1.2972	0.00281425	0.0227556
LOC_Os01g19170	Similar to polygalacturonase.	AT1G02460	Pectin lyase-like superfamily protein \\ Pectin lyase-like superfamily protein; FUNCTIONS IN: polygalacturonase activity; INVOLVED IN: carbohydrate metabolic process; EXPRESSED IN: stem, root, stamen, seed; EXPRESSED DURING: 4 anthesis, E expanded cotyledon stage; CONTAINS InterPro DOMAIN/s: Pectin lyase fold/virulence factor (InterPro:IPR011050), Glycoside hydrolase, family 28 (InterPro:IPR00074…	52.5012	15.4955	0.295146	-1.7605	3.45791e-06	9.62909e-05
LOC_Os02g06560	Protein of unknown function wound-induced domain containing protein.	AT4G10265	Wound-responsive family protein \\ Wound-responsive family protein; CONTAINS InterPro DOMAIN/s: Protein of unknown function wound-induced (InterPro:IPR022251); BEST Arabidopsis thaliana protein match is: Wound-responsive family protein (TAIR:AT4G10270.1); Has 164 Blast hits to 163 proteins in 16 species: Archae - 0; Bacteria - 0; Metazoa - 0; Fungi - 0; Plants - 164; Viruses - 0; Other Eukaryotes…	52.0195	12.81	0.246254	-2.02178	6.11723e-07	2.16214e-05
LOC_Os06g02870				50.5582	20.5305	0.406076	-1.30018	8.84423e-05	0.00146801
LOC_Os12g33922		ATMG00990.1	NADH dehydrogenase 3 \\ NADH dehydrogenase subunit 3 \\ NADH dehydrogenase 3 (NAD3); CONTAINS InterPro DOMAIN/s: NADH:ubiquinone/plastoquinone oxidoreductase, chain 3 (InterPro:IPR000440); BEST Arabidopsis thaliana protein match is: NADH:ubiquinone/plastoquinone oxidoreductase, chain 3 protein (TAIR:AT2G07751.1).	50.5532	11.7908	0.233235	-2.10015	3.62823e-08	1.75185e-06
LOC_Os07g42310	Transmembrane receptor, eukaryota domain containing protein.	AT1G72480	Lung seven transmembrane receptor family protein \\ Lung seven transmembrane receptor family protein; CONTAINS InterPro DOMAIN/s: Transmembrane receptor, eukaryota (InterPro:IPR009637); BEST Arabidopsis thaliana protein match is: Lung seven transmembrane receptor family protein (TAIR:AT2G01070.1); Has 596 Blast hits to 594 proteins in 172 species: Archae - 0; Bacteria - 0; Metazoa - 236; Fungi - …	50.0628	21.2301	0.42407	-1.23763	0.000207587	0.00292951
LOC_Os03g47530	Glycosyl transferase, family 8 protein.	GATL2	galacturonosyltransferase-like 2 \\ Encodes a protein with putative galacturonosyltransferase activity. \\ galacturonosyltransferase-like 2 (GATL2); FUNCTIONS IN: transferase activity, transferring hexosyl groups, polygalacturonate 4-alpha-galacturonosyltransferase activity, transferase activity, transferring glycosyl groups; INVOLVED IN: carbohydrate biosynthetic process; LOCATED IN: endomembran…	50.0578	18.5272	0.370115	-1.43395	8.3621e-05	0.00140089
LOC_Os11g06720	Similar to Anth (Pollen-specific desiccation-associated LLA23 protein).			49.1144	9.76534	0.198829	-2.3304	0.00545028	0.0376906
LOC_Os04g39170	Similar to OSIGBa0115M15.1 protein.			49.0956	23.9165	0.487141	-1.03759	0.00119726	0.0118279
LOC_Os07g29240	Conserved hypothetical protein.	AT3G23760	FUNCTIONS IN: molecular_function unknown; INVOLVED IN: biological_process unknown; LOCATED IN: vacuole; EXPRESSED IN: 20 plant structures; EXPRESSED DURING: 13 growth stages; BEST Arabidopsis thaliana protein match is: transferases, transferring glycosyl groups (TAIR:AT4G14100.1); Has 108 Blast hits to 104 proteins in 19 species: Archae - 0; Bacteria - 0; Metazoa - 8; Fungi - 0; Plants - 90; Viru…	47.1514	20.1961	0.428325	-1.22322	0.000316521	0.00412852
LOC_Os08g36340	Similar to KUP-related potassium transporter.	KT1	potassium transporter 1 \\ Encodes a high affinity potassium transporter. \\ potassium transporter 1 (KT1); CONTAINS InterPro DOMAIN/s: Potassium uptake protein, kup (InterPro:IPR018519), K+ potassium transporter (InterPro:IPR003855); BEST Arabidopsis thaliana protein match is: Potassium transporter family protein (TAIR:AT5G14880.1); Has 3625 Blast hits to 3386 proteins in 1031 species: Archae - …	47.1501	21.5535	0.457125	-1.12934	0.000845631	0.00895861
LOC_Os06g02410	Conserved hypothetical protein.			46.6597	22.2357	0.476551	-1.0693	0.002393	0.0201823
LOC_Os08g06530	Rubredoxin-type Fe(Cys)4 protein family protein.	ENH1	rubredoxin family protein \\ enhancer of sos3-1 (ENH1); FUNCTIONS IN: electron carrier activity, metal ion binding; LOCATED IN: chloroplast thylakoid membrane, chloroplast, chloroplast envelope; EXPRESSED IN: 22 plant structures; EXPRESSED DURING: 14 growth stages; CONTAINS InterPro DOMAIN/s: Rubredoxin-type Fe(Cys)4 protein (InterPro:IPR004039), PDZ/DHR/GLGF (InterPro:IPR001478); BEST Arabidopsi…	46.178	15.1521	0.328123	-1.60769	4.66173e-06	0.000124431
LOC_Os02g10730	Conserved hypothetical protein.			46.1755	19.1904	0.415597	-1.26674	0.000701019	0.00775567
LOC_Os01g73910	Peptidase M48, Ste24p family protein.	AT3G27110	Peptidase family M48 family protein \\ Peptidase family M48 family protein; FUNCTIONS IN: metalloendopeptidase activity; INVOLVED IN: proteolysis; LOCATED IN: chloroplast, membrane; EXPRESSED IN: 22 plant structures; EXPRESSED DURING: 13 growth stages; CONTAINS InterPro DOMAIN/s: Peptidase M48 (InterPro:IPR001915); Has 2654 Blast hits to 2654 proteins in 909 species: Archae - 247; Bacteria - 2042…	45.6951	16.146	0.353342	-1.50086	6.51041e-05	0.00113865
LOC_Os02g37060	Similar to photosystem II 5 kD protein.			45.1959	17.4951	0.387096	-1.36924	0.000101076	0.00164341
LOC_Os09g20000	Heavy metal transport/detoxification protein domain containing protein.	AT4G39700	Heavy metal transport/detoxification superfamily protein \\ Heavy metal transport/detoxification superfamily protein ; FUNCTIONS IN: metal ion binding; INVOLVED IN: metal ion transport; LOCATED IN: cellular_component unknown; CONTAINS InterPro DOMAIN/s: Heavy metal transport/detoxification protein (InterPro:IPR006121); BEST Arabidopsis thaliana protein match is: Heavy metal transport/detoxificati…	45.1809	7.76054	0.171766	-2.54148	0.000115145	0.00181963
LOC_Os01g68960	Conserved hypothetical protein.	AT3G07150	unknown protein; Has 19 Blast hits to 19 proteins in 8 species: Archae - 0; Bacteria - 0; Metazoa - 0; Fungi - 0; Plants - 19; Viruses - 0; Other Eukaryotes - 0 (source: NCBI BLink).	44.7154	21.8786	0.489286	-1.03125	0.00324599	0.0254034
LOC_Os07g48500	Ricin B-related lectin domain containing protein.	AT2G39050	hydroxyproline-rich glycoprotein family protein \\ hydroxyproline-rich glycoprotein family protein; CONTAINS InterPro DOMAIN/s: Ricin B-related lectin (InterPro:IPR008997), Ricin B lectin (InterPro:IPR000772); Has 1708 Blast hits to 1449 proteins in 222 species: Archae - 0; Bacteria - 47; Metazoa - 514; Fungi - 386; Plants - 615; Viruses - 5; Other Eukaryotes - 141 (source: NCBI BLink).	44.7055	19.9009	0.445156	-1.16762	0.000558228	0.00651764
LOC_Os06g47910	Transcription factor IIS, N-terminal domain containing protein.	AT1G28580	GDSL-like Lipase/Acylhydrolase superfamily protein \\ GDSL-like Lipase/Acylhydrolase superfamily protein; FUNCTIONS IN: lipase activity, hydrolase activity, acting on ester bonds, carboxylesterase activity; INVOLVED IN: lipid metabolic process; LOCATED IN: vacuole; EXPRESSED IN: 22 plant structures; EXPRESSED DURING: 13 growth stages; CONTAINS InterPro DOMAIN/s: Lipase, GDSL (InterPro:IPR001087);…	44.2487	13.4658	0.30432	-1.71634	0.00155149	0.0144658
LOC_Os08g36480	Similar to Nitrate reductase.	NIA1	nitrate reductase 1 \\ Encodes the cytosolic minor isoform of nitrate reductase (NR). Involved in the first step of nitrate assimilation, it contributes about 15% of the nitrate reductase activity in shoots. Similar to molybdopterin oxidoreductases at the N-terminus, and to FAD/NAD-binding cytochrome reductases at the C-terminus. Cofactors: FAD, heme iron (cytochrome B-557), and molybdenum-pterin…	44.2325	20.2334	0.457432	-1.12837	0.000607534	0.00697245
LOC_Os05g48930	Hypothetical gene.	GRX480	Thioredoxin superfamily protein \\ Encodes GRX480, a member of the glutaredoxin family that regulates protein redox state. GRX480 interacts with TGA factors and suppresses JA-responsive PDF1.2 transcription. GRX480 transcription is SA-inducible and requires NPR1. Maybe involved in SA/JA cross-talk. \\ GRX480; FUNCTIONS IN: electron carrier activity, protein disulfide oxidoreductase activity; INVO…	42.7774	20.2234	0.472759	-1.08082	0.0031558	0.0248847
LOC_Os01g61680	Conserved hypothetical protein.	AT4G08330	unknown protein; FUNCTIONS IN: molecular_function unknown; INVOLVED IN: biological_process unknown; LOCATED IN: plasma membrane; EXPRESSED IN: 24 plant structures; EXPRESSED DURING: 14 growth stages; BEST Arabidopsis thaliana protein match is: unknown protein (TAIR:AT2G17705.1); Has 98 Blast hits to 98 proteins in 13 species: Archae - 0; Bacteria - 0; Metazoa - 0; Fungi - 0; Plants - 98; Viruses …	42.7674	21.2111	0.495963	-1.0117	0.00387353	0.0291096
LOC_Os11g31050	Retrotransposon protein, putative, unclassified	AT3G33076	transposable element gene \\ gypsy-like retrotransposon family, has a 4.2e-187 P-value blast match to GB:AAD22153 polyprotein (Gypsy_Ty3-element) (Sorghum bicolor)	40.8369	13.4424	0.329173	-1.60308	6.93395e-05	0.00120184
LOC_Os04g45730	Serine/threonine protein kinase domain containing protein.	AT1G33265	Protein kinase superfamily protein \\ Protein kinase superfamily protein; FUNCTIONS IN: kinase activity; INVOLVED IN: protein amino acid phosphorylation; LOCATED IN: cellular_component unknown; EXPRESSED IN: 16 plant structures; EXPRESSED DURING: 7 growth stages; CONTAINS InterPro DOMAIN/s: Protein kinase, ATP binding site (InterPro:IPR017441), Protein kinase, catalytic domain (InterPro:IPR000719…	40.349	15.8207	0.392098	-1.35071	0.000170179	0.00248058
LOC_Os12g34058		ATMG00990.1	NADH dehydrogenase 3 \\ NADH dehydrogenase subunit 3 \\ NADH dehydrogenase 3 (NAD3); CONTAINS InterPro DOMAIN/s: NADH:ubiquinone/plastoquinone oxidoreductase, chain 3 (InterPro:IPR000440); BEST Arabidopsis thaliana protein match is: NADH:ubiquinone/plastoquinone oxidoreductase, chain 3 protein (TAIR:AT2G07751.1).	40.3465	11.1184	0.275573	-1.85949	7.78613e-06	0.000189453
LOC_Os05g38860	Hypothetical conserved gene.			40.3328	19.8601	0.492405	-1.02208	0.00341356	0.0263431
LOC_Os02g52630	Similar to Xyloglucan fucosyltransferase-like [Oryza sativa (japonica cultivar-group)].	FT1	fucosyltransferase 1 \\ member of Glycosyltransferase Family- 37 \\ fucosyltransferase 1 (FT1); FUNCTIONS IN: transferase activity, transferring glycosyl groups, fucosyltransferase activity; INVOLVED IN: plant-type cell wall biogenesis, xyloglucan biosynthetic process; LOCATED IN: membrane; EXPRESSED IN: 23 plant structures; EXPRESSED DURING: 14 growth stages; CONTAINS InterPro DOMAIN/s: Xylogluc…	39.8635	12.4748	0.312938	-1.67605	5.0091e-05	0.000914487
LOC_Os05g06340	Zinc finger, NHR/GATA-type domain containing protein.	GATA23	GATA transcription factor 23 \\ Encodes a member of the GATA factor family of zinc finger transcription factors. \\ GATA transcription factor 23 (GATA23); FUNCTIONS IN: sequence-specific DNA binding, zinc ion binding, sequence-specific DNA binding transcription factor activity; INVOLVED IN: response to light stimulus; EXPRESSED IN: root; CONTAINS InterPro DOMAIN/s: Zinc finger, NHR/GATA-type (Int…	39.8523	19.5064	0.489468	-1.03071	0.00532138	0.0370016
LOC_Os09g21710	Zinc finger, AN1-type domain containing protein.	PMZ	zinc finger (AN1-like) family protein \\ Encodes a putative zinc finger protein (PMZ). \\ PMZ; FUNCTIONS IN: zinc ion binding; INVOLVED IN: response to abscisic acid stimulus, response to chitin; LOCATED IN: cellular_component unknown; EXPRESSED IN: 12 plant structures; EXPRESSED DURING: 10 growth stages; CONTAINS InterPro DOMAIN/s: Zinc finger, AN1-type (InterPro:IPR000058); BEST Arabidopsis tha…	39.3768	14.1629	0.359677	-1.47523	0.00115639	0.0115124
LOC_Os05g45110	UDP-glucuronosyl/UDP-glucosyltransferase family protein.	UGT88A1	UDP-glucosyl transferase 88A1 \\ UDP-glucosyl transferase 88A1 (UGT88A1); FUNCTIONS IN: in 6 functions; INVOLVED IN: metabolic process; LOCATED IN: cellular_component unknown; EXPRESSED IN: 22 plant structures; EXPRESSED DURING: 13 growth stages; CONTAINS InterPro DOMAIN/s: UDP-glucuronosyl/UDP-glucosyltransferase (InterPro:IPR002213); BEST Arabidopsis thaliana protein match is: UDP-glucosyl tran…	39.3706	17.5425	0.445573	-1.16627	0.00188179	0.0167879
LOC_Os02g06070		RLP3	receptor like protein 3 \\ receptor like protein 3 (RLP3); CONTAINS InterPro DOMAIN/s: Leucine-rich repeat-containing N-terminal domain, type 2 (InterPro:IPR013210), Leucine-rich repeat (InterPro:IPR001611); BEST Arabidopsis thaliana protein match is: receptor like protein 2 (TAIR:AT1G17240.1); Has 81484 Blast hits to 24794 proteins in 958 species: Archae - 37; Bacteria - 4331; Metazoa - 15807; F…	39.3681	19.1985	0.487667	-1.03603	0.00429165	0.0315628
LOC_Os07g37240	Similar to Chlorophyll a/b-binding protein CP29 precursor.	LHCB4.2	light harvesting complex photosystem II \\ Lhcb4.2 protein (Lhcb4.2, protein involved in the light harvesting complex of photosystem II \\ light harvesting complex photosystem II (LHCB4.2); FUNCTIONS IN: chlorophyll binding; INVOLVED IN: response to blue light, response to red light, response to far red light; LOCATED IN: chloroplast thylakoid membrane, chloroplast, membrane, chloroplast envelope…	38.8939	10.4468	0.268597	-1.89648	1.10312e-06	3.62421e-05
LOC_Os05g04700	Similar to ICT protein (Fragment).	RCI2A	Low temperature and salt responsive protein family \\ Induced by low temperatures, dehydration and salt stress and ABA. Encodes a small (54 amino acids), highly hydrophobic protein that bears two potential transmembrane domains. \\ RARE-COLD-INDUCIBLE 2A (RCI2A); CONTAINS InterPro DOMAIN/s: Uncharacterised protein family UPF0057 (InterPro:IPR000612); BEST Arabidopsis thaliana protein match is: Lo…	38.8664	2.35302	0.0605411	-4.04594	6.20132e-06	0.000158485
LOC_Os03g41860				38.401	16.8528	0.438863	-1.18816	0.00157193	0.0146311
LOC_Os05g42210	Similar to Receptor-like protein kinase 5.	RK3	receptor kinase 3 \\ encodes a putative receptor-like serine/threonine protein kinases that is similar to Brassica self-incompatibility (S) locus. Expressed in root. Shoot expression limited to limited to the root-hypocotyl transition zone and at the base of lateral roots as well as in axillary buds, and pedicels. \\ receptor kinase 3 (RK3); FUNCTIONS IN: transmembrane receptor protein serine/thr…	38.3835	13.1316	0.342115	-1.54745	0.000196255	0.00278998
LOC_Os04g53680	Cyclin-P1-1.	CYCP2;1	cyclin p2;1 \\ cyclin p2;1 (CYCP2;1); CONTAINS InterPro DOMAIN/s: Negative regulatory factor PREG (InterPro:IPR012389), Cyclin-like (InterPro:IPR011028), Cyclin-related 2 (InterPro:IPR013922), Cyclin (InterPro:IPR006670); BEST Arabidopsis thaliana protein match is: cyclin p4;1 (TAIR:AT2G44740.1); Has 1311 Blast hits to 1303 proteins in 220 species: Archae - 0; Bacteria - 18; Metazoa - 222; Fungi …	37.9105	17.8548	0.470972	-1.08629	0.00322161	0.0252775
LOC_Os01g58850	Similar to Circadian clock coupling factor ZGT.	EDL3	EID1-like 3 \\ EID1-like 3 (EDL3); BEST Arabidopsis thaliana protein match is: EID1-like 1 (TAIR:AT5G15440.1); Has 30201 Blast hits to 17322 proteins in 780 species: Archae - 12; Bacteria - 1396; Metazoa - 17338; Fungi - 3422; Plants - 5037; Viruses - 0; Other Eukaryotes - 2996 (source: NCBI BLink).	37.9006	6.40045	0.168875	-2.56597	0.000199715	0.00283173
LOC_Os07g32020	UDP-glucuronosyl/UDP-glucosyltransferase family protein.	UGT71B6	UDP-glucosyl transferase 71B6 \\ Encodes a protein with UDP-glucosyl transferase activity that was shown to preferentially glucosylates abscisic acid (ABA), and not its catabolites. Moreover, UGT71B6 was shown to have a strict preference for the naturally-occurring ABA enantiomer, (+)-ABA, and not its 'unnatural' relative, (-)-ABA. This is in contrast to the other identified UGT genes catalyzing …	37.4176	16.8448	0.450183	-1.15142	0.00275088	0.0223568
LOC_Os03g12210	Hypothetical conserved gene.			36.9434	18.1883	0.492328	-1.02231	0.00474021	0.0338807
LOC_Os11g02750	Protein of unknown function DUF567 family protein.	AT2G38640	Protein of unknown function (DUF567) \\ Protein of unknown function (DUF567); CONTAINS InterPro DOMAIN/s: Protein of unknown function DUF567 (InterPro:IPR007612); BEST Arabidopsis thaliana protein match is: Protein of unknown function (DUF567) (TAIR:AT5G41590.1); Has 389 Blast hits to 388 proteins in 15 species: Archae - 0; Bacteria - 0; Metazoa - 0; Fungi - 1; Plants - 388; Viruses - 0; Other Eu…	36.9297	10.7849	0.29204	-1.77576	4.31554e-05	0.000801427
LOC_Os12g35070	Hypothetical conserved gene.			35.9625	11.4518	0.318436	-1.65093	4.83027e-05	0.000886063
LOC_Os01g38140	Hypothetical protein.	ROF2	FKBP-type peptidyl-prolyl cis-trans isomerase family protein \\ FKBP-type peptidyl-prolyl cis-trans isomerase family protein; FUNCTIONS IN: FK506 binding, peptidyl-prolyl cis-trans isomerase activity, calmodulin binding; INVOLVED IN: protein folding; LOCATED IN: vacuole; EXPRESSED IN: 25 plant structures; EXPRESSED DURING: 14 growth stages; CONTAINS InterPro DOMAIN/s: Tetratricopeptide TPR-1 (Int…	35.9625	12.1359	0.33746	-1.56721	0.000392886	0.00490908
LOC_Os06g20020				35.4908	14.8304	0.417866	-1.25889	0.0047598	0.0339758
LOC_Os07g48950	Similar to BADH-like protein.	ALDH22A1	aldehyde dehydrogenase 22A1 \\ Encodes a putative aldehyde dehydrogenase. The gene is not responsive to osmotic stress and is expressed constitutively at a low level in plantlets and root cultures. \\ aldehyde dehydrogenase 22A1 (ALDH22A1); FUNCTIONS IN: 3-chloroallyl aldehyde dehydrogenase activity, oxidoreductase activity; INVOLVED IN: oxidation reduction, metabolic process; LOCATED IN: endopla…	35.0041	15.49	0.442519	-1.17619	0.00418936	0.0309328
LOC_Os06g51170	Similar to Protein kinase APK1A, chloroplast precursor (EC 2.7.1.-).	AT2G17220	Protein kinase superfamily protein \\ Protein kinase superfamily protein; FUNCTIONS IN: protein serine/threonine kinase activity, protein kinase activity, kinase activity, ATP binding; INVOLVED IN: protein amino acid phosphorylation; LOCATED IN: chloroplast; EXPRESSED IN: 22 plant structures; EXPRESSED DURING: 13 growth stages; CONTAINS InterPro DOMAIN/s: Protein kinase, ATP binding site (InterPr…	34.5112	16.1623	0.468321	-1.09443	0.00451598	0.0327103
LOC_Os01g58800	Conserved hypothetical protein.			34.505	16.5076	0.478413	-1.06367	0.00684224	0.0444943
LOC_Os11g42110		AT5G45500	RNI-like superfamily protein \\ RNI-like superfamily protein; FUNCTIONS IN: molecular_function unknown; INVOLVED IN: biological_process unknown; LOCATED IN: cellular_component unknown; EXPRESSED IN: 23 plant structures; EXPRESSED DURING: 13 growth stages; BEST Arabidopsis thaliana protein match is: Leucine-rich repeat (LRR) family protein (TAIR:AT5G45520.1); Has 30201 Blast hits to 17322 proteins…	34.0295	13.7931	0.405327	-1.30284	0.00162937	0.0150363
LOC_Os09g09930	Heavy metal transport/detoxification protein domain containing protein.			34.0183	16.1585	0.474996	-1.07401	0.0058575	0.0396349
LOC_Os01g41710	Chlorophyll a-b binding protein 2, chloroplast precursor (LHCII type I CAB-2) (LHCP).	LHB1B2	photosystem II light harvesting complex gene B1B2 \\ Photosystem II type I chlorophyll a/b-binding protein \\ photosystem II light harvesting complex gene B1B2 (LHB1B2); FUNCTIONS IN: chlorophyll binding; INVOLVED IN: photosynthesis, light harvesting in photosystem II, photosynthesis; LOCATED IN: in 7 components; EXPRESSED IN: cotyledon, guard cell, juvenile leaf, cultured cell, leaf; EXPRESSED D…	33.5491	4.69976	0.140086	-2.83562	4.01823e-05	0.000756081
LOC_Os01g67950	Similar to BCL-2 binding anthanogene-1.	AT5G14360	Ubiquitin-like superfamily protein \\ Ubiquitin-like superfamily protein; CONTAINS InterPro DOMAIN/s: Ubiquitin (InterPro:IPR000626), Ubiquitin supergroup (InterPro:IPR019955); BEST Arabidopsis thaliana protein match is: Ubiquitin-like superfamily protein (TAIR:AT5G40630.1); Has 222 Blast hits to 222 proteins in 21 species: Archae - 0; Bacteria - 0; Metazoa - 4; Fungi - 6; Plants - 210; Viruses -…	33.5278	10.4387	0.311343	-1.68342	0.00436747	0.0319417
LOC_Os01g66100	Similar to GA C20oxidase2.	GA20OX1	2-oxoglutarate (2OG) and Fe(II)-dependent oxygenase superfamily protein \\ Encodes gibberellin 20-oxidase that is involved in the later steps of the gibberellin biosynthetic pathway. Regulated by a circadian clock. Weak expression response to far red light. \\ GA20OX1; CONTAINS InterPro DOMAIN/s: Isopenicillin N synthase (InterPro:IPR002283), Oxoglutarate/iron-dependent oxygenase (InterPro:IPR005…	32.567	15.836	0.48626	-1.0402	0.0047449	0.0339052
LOC_Os10g40040	Similar to DM280 protein.	AT5G52420	unknown protein; FUNCTIONS IN: molecular_function unknown; INVOLVED IN: biological_process unknown; LOCATED IN: endoplasmic reticulum; EXPRESSED IN: 24 plant structures; EXPRESSED DURING: 13 growth stages; BEST Arabidopsis thaliana protein match is: unknown protein (TAIR:AT5G23920.1); Has 30201 Blast hits to 17322 proteins in 780 species: Archae - 12; Bacteria - 1396; Metazoa - 17338; Fungi - 342…	31.5998	14.8213	0.469032	-1.09224	0.00792846	0.0494642
LOC_Os01g12920	Conserved hypothetical protein.	AT3G16175	Thioesterase superfamily protein \\ Thioesterase superfamily protein; CONTAINS InterPro DOMAIN/s: Thioesterase superfamily (InterPro:IPR006683); BEST Arabidopsis thaliana protein match is: Thioesterase superfamily protein (TAIR:AT1G52191.1); Has 298 Blast hits to 297 proteins in 61 species: Archae - 0; Bacteria - 6; Metazoa - 132; Fungi - 4; Plants - 150; Viruses - 0; Other Eukaryotes - 6 (source…	31.5973	12.4711	0.394689	-1.34121	0.00158627	0.0147241
LOC_Os10g03620	Cyclin-like F-box domain containing protein.	AT5G44950	F-box/RNI-like/FBD-like domains-containing protein \\ F-box/RNI-like/FBD-like domains-containing protein; CONTAINS InterPro DOMAIN/s: FBD (InterPro:IPR013596), F-box domain, cyclin-like (InterPro:IPR001810), F-box domain, Skp2-like (InterPro:IPR022364), FBD-like (InterPro:IPR006566), Leucine-rich repeat 2 (InterPro:IPR013101); BEST Arabidopsis thaliana protein match is: F-box/RNI-like/FBD-like do…	30.6252	13.833	0.451689	-1.1466	0.00691321	0.0448345
LOC_Os06g31300				30.6214	11.0875	0.362084	-1.4656	0.00242152	0.0203709
LOC_Os08g38740	Similar to Glycosyl transferase-like protein (Fragment).	GAUT4	galacturonosyltransferase 4 \\ Encodes a protein with putative galacturonosyltransferase activity. \\ galacturonosyltransferase 4 (GAUT4); FUNCTIONS IN: polygalacturonate 4-alpha-galacturonosyltransferase activity, transferase activity, transferring glycosyl groups; INVOLVED IN: carbohydrate biosynthetic process; LOCATED IN: endomembrane system; EXPRESSED IN: 22 plant structures; EXPRESSED DURING…	30.6202	11.7861	0.384912	-1.3774	0.00201565	0.0176665
LOC_Os04g11390	Conserved hypothetical protein.			29.6468	11.1145	0.374896	-1.41544	0.000796819	0.00855307
LOC_Os02g51570	Peptidyl-prolyl cis-trans isomerase, FKBP-type domain containing protein.	FKBP16-2	FK506-binding protein 16-2 \\ FK506-binding protein 16-2 (FKBP16-2); FUNCTIONS IN: FK506 binding, peptidyl-prolyl cis-trans isomerase activity; INVOLVED IN: protein folding; LOCATED IN: thylakoid, chloroplast thylakoid membrane, chloroplast thylakoid lumen, chloroplast; EXPRESSED IN: 20 plant structures; EXPRESSED DURING: 13 growth stages; CONTAINS InterPro DOMAIN/s: Peptidyl-prolyl cis-trans iso…	29.6356	12.1185	0.408916	-1.29012	0.00720355	0.0462214
LOC_Os04g44340	Protein of unknown function DUF177 domain containing protein.	AT3G19800	Protein of unknown function (DUF177) \\ Protein of unknown function (DUF177); CONTAINS InterPro DOMAIN/s: Protein of unknown function DUF177 (InterPro:IPR003772); Has 29 Blast hits to 29 proteins in 11 species: Archae - 0; Bacteria - 0; Metazoa - 0; Fungi - 0; Plants - 29; Viruses - 0; Other Eukaryotes - 0 (source: NCBI BLink).	29.1739	7.06826	0.242281	-2.04525	2.51665e-05	0.000507818
LOC_Os03g16500	Peptidase aspartic, catalytic domain containing protein.	AT2G39710	Eukaryotic aspartyl protease family protein \\ Encodes a Cysteine-rich peptide (CRP) family protein \\ Eukaryotic aspartyl protease family protein; FUNCTIONS IN: aspartic-type endopeptidase activity; INVOLVED IN: proteolysis; EXPRESSED IN: 20 plant structures; EXPRESSED DURING: 10 growth stages; CONTAINS InterPro DOMAIN/s: Peptidase aspartic (InterPro:IPR021109), Peptidase aspartic, catalytic (In…	29.1639	11.7924	0.404349	-1.30633	0.00249241	0.020806
LOC_Os03g53340	Similar to Heat stress transcription factor A-2a.	HSFA6B	heat shock transcription factor A6B \\ member of Heat Stress Transcription Factor (Hsf) family \\ heat shock transcription factor A6B (HSFA6B); FUNCTIONS IN: DNA binding, sequence-specific DNA binding transcription factor activity; INVOLVED IN: regulation of transcription, DNA-dependent; LOCATED IN: nucleus; EXPRESSED IN: root; CONTAINS InterPro DOMAIN/s: Winged helix-turn-helix transcription rep…	29.1614	5.72268	0.196242	-2.3493	3.79583e-06	0.000104012
LOC_Os12g34128		ATMG00080.1	ribosomal protein L16 \\ encodes a mitochondrial ribosomal protein L16, which is a constituent of the large ribosomal subunit \\ ribosomal protein L16 (RPL16); CONTAINS InterPro DOMAIN/s: Ribosomal protein L16 (InterPro:IPR000114), Ribosomal protein L10e/L16 (InterPro:IPR016180), Ribosomal protein L16, conserved site (InterPro:IPR020798); BEST Arabidopsis thaliana protein match is: ribosomal prot…	29.1614	6.08172	0.208554	-2.26151	1.69606e-05	0.000363103
LOC_Os05g43460	Protein of unknown function DUF567 family protein.	AT3G15810	Protein of unknown function (DUF567) \\ Protein of unknown function (DUF567); CONTAINS InterPro DOMAIN/s: Protein of unknown function DUF567 (InterPro:IPR007612); BEST Arabidopsis thaliana protein match is: Protein of unknown function (DUF567) (TAIR:AT1G80120.1); Has 436 Blast hits to 435 proteins in 18 species: Archae - 0; Bacteria - 0; Metazoa - 0; Fungi - 7; Plants - 429; Viruses - 0; Other Eu…	28.1892	11.1011	0.393805	-1.34445	0.00248274	0.0207578
LOC_Os03g10950	Similar to Protein phosphatase 2C-like.	AT4G33920	Protein phosphatase 2C family protein \\ Protein phosphatase 2C family protein; FUNCTIONS IN: protein serine/threonine phosphatase activity, catalytic activity; INVOLVED IN: protein amino acid dephosphorylation; LOCATED IN: mitochondrion, protein serine/threonine phosphatase complex; EXPRESSED IN: 23 plant structures; EXPRESSED DURING: 13 growth stages; CONTAINS InterPro DOMAIN/s: Protein phospha…	27.6951	4.38177	0.158215	-2.66004	0.00457431	0.0329387
LOC_Os05g48630	Photosystem I reaction center subunit VI, chloroplast precursor (PSI- H) (Light-harvesting complex I 11 kDa protein) (GOS5 protein).	PSAH2	photosystem I subunit H2 \\ photosystem I subunit H2 (PSAH2); FUNCTIONS IN: molecular_function unknown; INVOLVED IN: photosynthesis; LOCATED IN: in 6 components; EXPRESSED IN: 21 plant structures; EXPRESSED DURING: 13 growth stages; CONTAINS InterPro DOMAIN/s: Photosystem I reaction centre subunit VI (InterPro:IPR004928); BEST Arabidopsis thaliana protein match is: photosystem I subunit H-1 (TAIR…	27.2259	10.0826	0.370331	-1.43311	0.000721899	0.00794118
LOC_Os10g39770	Zinc finger, RING/FYVE/PHD-type domain containing protein.	AT4G35840	RING/U-box superfamily protein \\ RING/U-box superfamily protein; FUNCTIONS IN: zinc ion binding; CONTAINS InterPro DOMAIN/s: Zinc finger, RING-type (InterPro:IPR001841); BEST Arabidopsis thaliana protein match is: NEP-interacting protein 2 (TAIR:AT2G17730.1); Has 8964 Blast hits to 8940 proteins in 268 species: Archae - 0; Bacteria - 2; Metazoa - 2132; Fungi - 649; Plants - 5031; Viruses - 28; O…	26.7354	8.73625	0.326767	-1.61367	0.00233638	0.0198346
LOC_Os12g38900	Similar to Chorismate mutase, chloroplast precursor (EC 5.4.99.5) (CM-1).	CM1	chorismate mutase 1 \\ L-ascorbate peroxidase \\ chorismate mutase 1 (CM1); CONTAINS InterPro DOMAIN/s: Chorismate mutase, type II (InterPro:IPR020822), Chorismate mutase, AroQ class, eukaryotic type (InterPro:IPR008238); BEST Arabidopsis thaliana protein match is: chorismate mutase 3 (TAIR:AT1G69370.1); Has 278 Blast hits to 278 proteins in 116 species: Archae - 0; Bacteria - 2; Metazoa - 0; Fun…	26.7292	7.06728	0.264403	-1.91919	0.00018899	0.0027009
LOC_Os02g21320				25.7596	8.08295	0.313785	-1.67215	0.00151789	0.0142261
LOC_Os10g39170	Similar to Peroxidase 1.	RCI3	Peroxidase superfamily protein \\ Encodes a cold-inducible cationic peroxidase that is involved in the stress response. In response to low temperature, RCI3 transcripts accumulate in the aerial part and in roots of etiolated seedlings but only in roots of light-grown seedlings. \\ RARE COLD INDUCIBLE GENE 3 (RCI3); FUNCTIONS IN: peroxidase activity; INVOLVED IN: response to desiccation, response …	25.7558	6.05702	0.235171	-2.08822	7.96743e-05	0.0013456
LOC_Os04g44980	Short-chain dehydrogenase/reductase SDR domain containing protein.	AT1G01800	NAD(P)-binding Rossmann-fold superfamily protein \\ NAD(P)-binding Rossmann-fold superfamily protein; FUNCTIONS IN: oxidoreductase activity, binding, catalytic activity; INVOLVED IN: oxidation reduction, metabolic process; LOCATED IN: plant-type cell wall; EXPRESSED IN: 22 plant structures; EXPRESSED DURING: 13 growth stages; CONTAINS InterPro DOMAIN/s: NAD(P)-binding domain (InterPro:IPR016040),…	25.7458	5.71445	0.221956	-2.17165	0.00573642	0.0391348
LOC_Os02g43620	Major facilitator superfamily MFS_1 protein.	AT4G17550	Major facilitator superfamily protein \\ Major facilitator superfamily protein; FUNCTIONS IN: sugar:hydrogen symporter activity; INVOLVED IN: carbohydrate transport, transmembrane transport; LOCATED IN: plasma membrane; EXPRESSED IN: 24 plant structures; EXPRESSED DURING: 14 growth stages; CONTAINS InterPro DOMAIN/s: Major facilitator superfamily (InterPro:IPR020846), Major facilitator superfamil…	25.2754	8.07213	0.319368	-1.64671	0.00454711	0.032839
LOC_Os12g34124		ATMG00090.1	structural constituent of ribosome;protein binding \\ ribosomal protein S3 \\ RESISTANCE TO PSEUDOMONAS SYRINGAE 3 (RPS3); CONTAINS InterPro DOMAIN/s: K Homology, prokaryotic type (InterPro:IPR009019), Ribosomal protein S3, N-terminal (InterPro:IPR008282), Ribosomal protein S3, C-terminal (InterPro:IPR001351).	25.2754	9.43308	0.373212	-1.42193	0.00606372	0.0406571
LOC_Os03g12990	Phytosulfokine family protein.			25.2716	11.4681	0.453794	-1.13989	0.00664933	0.0435646
LOC_Os03g47210	Hypothetical conserved gene.			25.2679	4.37538	0.17316	-2.52982	1.78069e-06	5.49634e-05
LOC_Os01g66850	Pectinacetylesterase family protein.	AT3G62060	Pectinacetylesterase family protein \\ Pectinacetylesterase family protein; FUNCTIONS IN: carboxylesterase activity; INVOLVED IN: biological_process unknown; LOCATED IN: endomembrane system; EXPRESSED IN: 22 plant structures; EXPRESSED DURING: 13 growth stages; CONTAINS InterPro DOMAIN/s: Pectinacetylesterase (InterPro:IPR004963); BEST Arabidopsis thaliana protein match is: Pectinacetylesterase f…	24.7874	10.782	0.434978	-1.20098	0.00758426	0.0480278
LOC_Os02g21310	Conserved hypothetical protein.			24.312	4.71242	0.193831	-2.36713	0.000838587	0.00890595
LOC_Os08g02700	Similar to Fructose-bisphosphate aldolase, cytoplasmic isozyme (EC 4.1.2.13).	AT2G36460	Aldolase superfamily protein \\ Aldolase superfamily protein; FUNCTIONS IN: copper ion binding; INVOLVED IN: response to cadmium ion, response to salt stress, pentose-phosphate shunt; LOCATED IN: mitochondrion, plasma membrane, membrane; EXPRESSED IN: 24 plant structures; EXPRESSED DURING: 15 growth stages; CONTAINS InterPro DOMAIN/s: Aldolase-type TIM barrel (InterPro:IPR013785), Fructose-bispho…	24.3045	10.1063	0.41582	-1.26597	0.0061665	0.0411389
LOC_Os03g09170	Pathogenesis-related transcriptional factor and ERF domain containing protein.	AT5G65130	Integrase-type DNA-binding superfamily protein \\ encodes a member of the DREB subfamily A-6 of ERF/AP2 transcription factor family. The protein contains one AP2 domain. There are 8 members in this subfamily including RAP2.4. \\ Integrase-type DNA-binding superfamily protein; FUNCTIONS IN: DNA binding, sequence-specific DNA binding transcription factor activity; INVOLVED IN: regulation of transcr…	24.3007	7.40064	0.304544	-1.71528	0.00161317	0.0149276
LOC_Os05g44060	Conserved hypothetical protein.	AT2G01300	unknown protein; BEST Arabidopsis thaliana protein match is: unknown protein (TAIR:AT1G15010.1); Has 73 Blast hits to 73 proteins in 12 species: Archae - 0; Bacteria - 0; Metazoa - 0; Fungi - 0; Plants - 73; Viruses - 0; Other Eukaryotes - 0 (source: NCBI BLink).	23.8103	3.03349	0.127402	-2.97254	0.00257712	0.0213162
LOC_Os03g45120	Hypothetical conserved gene.			23.3336	6.74573	0.289099	-1.79036	0.000327464	0.00422842
LOC_Os08g30150	Similar to Oxidoreductase, 2OG-Fe oxygenase family protein, expressed.	AT1G06620	2-oxoglutarate (2OG) and Fe(II)-dependent oxygenase superfamily protein \\ encodes a protein whose sequence is similar to a 2-oxoglutarate-dependent dioxygenase \\ 2-oxoglutarate (2OG) and Fe(II)-dependent oxygenase superfamily protein; CONTAINS InterPro DOMAIN/s: Oxoglutarate/iron-dependent oxygenase (InterPro:IPR005123); BEST Arabidopsis thaliana protein match is: 2-oxoglutarate (2OG) and Fe(II…	23.3274	6.40586	0.274607	-1.86456	0.00078772	0.00847897
LOC_Os01g03720	Myb transcription factor domain containing protein.	MYB62	myb domain protein 62 \\ putative transcription factor: R2R3-MYB transcription family. Involved in regulation of phosphate starvation responses and gibberellic acid biosynthesis. \\ myb domain protein 62 (MYB62); CONTAINS InterPro DOMAIN/s: SANT, DNA-binding (InterPro:IPR001005), Homeodomain-like (InterPro:IPR009057), Myb, DNA-binding (InterPro:IPR014778), HTH transcriptional regulator, Myb-type,…	22.8544	8.42	0.368419	-1.44058	0.00463553	0.0333155
LOC_Os09g37500	Similar to Auxin induced protein.	AT5G27780	SAUR-like auxin-responsive protein family \\ SAUR-like auxin-responsive protein family ; CONTAINS InterPro DOMAIN/s: Auxin responsive SAUR protein (InterPro:IPR003676); BEST Arabidopsis thaliana protein match is: SAUR-like auxin-responsive protein family (TAIR:AT1G29430.1); Has 1807 Blast hits to 1807 proteins in 277 species: Archae - 0; Bacteria - 0; Metazoa - 736; Fungi - 347; Plants - 385; Vir…	22.8444	8.75237	0.38313	-1.3841	0.00599978	0.0403753
LOC_Os03g07600	Mo25-like domain containing protein.	AT5G47540	Mo25 family protein \\ Mo25 family protein; FUNCTIONS IN: binding; INVOLVED IN: biological_process unknown; EXPRESSED IN: 24 plant structures; EXPRESSED DURING: 15 growth stages; CONTAINS InterPro DOMAIN/s: Mo25-like (InterPro:IPR013878), Armadillo-type fold (InterPro:IPR016024); BEST Arabidopsis thaliana protein match is: Mo25 family protein (TAIR:AT4G17270.1); Has 570 Blast hits to 568 proteins…	22.3552	5.39192	0.241193	-2.05174	0.00190263	0.0169339
LOC_Os06g07800	Conserved hypothetical protein.			21.8773	8.43462	0.385543	-1.37504	0.00607241	0.0406919
LOC_Os04g01650	NAD(P)-binding domain containing protein.	AT2G45630	D-isomer specific 2-hydroxyacid dehydrogenase family protein \\ D-isomer specific 2-hydroxyacid dehydrogenase family protein; FUNCTIONS IN: NAD or NADH binding, binding, oxidoreductase activity, acting on the CH-OH group of donors, NAD or NADP as acceptor, catalytic activity; INVOLVED IN: metabolic process; EXPRESSED IN: stem; CONTAINS InterPro DOMAIN/s: D-isomer specific 2-hydroxyacid dehydrogen…	21.8748	5.71641	0.261324	-1.93609	0.000470077	0.00568444
LOC_Os11g43790	Protein of unknown function DUF581 family protein.	AT1G78020	Protein of unknown function (DUF581) \\ Protein of unknown function (DUF581); EXPRESSED IN: 23 plant structures; EXPRESSED DURING: 13 growth stages; CONTAINS InterPro DOMAIN/s: Protein of unknown function DUF581 (InterPro:IPR007650); BEST Arabidopsis thaliana protein match is: Protein of unknown function (DUF581) (TAIR:AT1G22160.1); Has 525 Blast hits to 525 proteins in 19 species: Archae - 0; Ba…	21.8623	3.04172	0.139131	-2.84548	0.00599082	0.0403351
LOC_Os07g32630	UDP-glucuronosyl/UDP-glucosyltransferase family protein.	AT3G21790	UDP-Glycosyltransferase superfamily protein \\ UDP-Glycosyltransferase superfamily protein; FUNCTIONS IN: transferase activity, transferring hexosyl groups, UDP-glycosyltransferase activity; INVOLVED IN: metabolic process; LOCATED IN: cellular_component unknown; EXPRESSED IN: 20 plant structures; EXPRESSED DURING: 13 growth stages; CONTAINS InterPro DOMAIN/s: UDP-glucuronosyl/UDP-glucosyltransfer…	21.3893	7.42424	0.3471	-1.52658	0.0046365	0.0333155
LOC_Os01g65992	Protein of unknown function DUF679 domain containing protein.	DMP1	DUF679 domain membrane protein 1 \\ DUF679 domain membrane protein 1 (DMP1); CONTAINS InterPro DOMAIN/s: Protein of unknown function DUF679 (InterPro:IPR007770); BEST Arabidopsis thaliana protein match is: DUF679 domain membrane protein 2 (TAIR:AT3G21550.1); Has 263 Blast hits to 255 proteins in 17 species: Archae - 0; Bacteria - 0; Metazoa - 0; Fungi - 0; Plants - 263; Viruses - 0; Other Eukaryo…	21.3868	7.75415	0.362566	-1.46368	0.00429219	0.0315628
LOC_Os07g48560	Homeodomain-like containing protein.	WOX11	WUSCHEL related homeobox 11 \\ Encodes a WUSCHEL-related homeobox gene family member with 65 amino acids in its homeodomain. Proteins in this family contain a sequence of eight residues (TLPLFPMH) downstream of the homeodomain called the WUS box. \\ WUSCHEL related homeobox 11 (WOX11); FUNCTIONS IN: DNA binding, sequence-specific DNA binding transcription factor activity; INVOLVED IN: regulation …	20.9002	6.40045	0.30624	-1.70727	0.00214338	0.0185218
LOC_Os06g16030	Similar to OSIGBa0140C02.5 protein.	AT4G34880	Amidase family protein \\ Amidase family protein; FUNCTIONS IN: amidase activity, carbon-nitrogen ligase activity, with glutamine as amido-N-donor; INVOLVED IN: acrylonitrile catabolic process, aldoxime metabolic process; LOCATED IN: endomembrane system; EXPRESSED IN: root; CONTAINS InterPro DOMAIN/s: Amidase (InterPro:IPR000120); BEST Arabidopsis thaliana protein match is: Amidase family protein…	20.8964	5.71359	0.273424	-1.87079	0.00129742	0.0126191
LOC_Os06g33700				20.4147	6.74389	0.330344	-1.59796	0.00272422	0.0222069
LOC_Os11g30760	Glycosyl transferase, family 31 domain containing protein.			19.9255	7.41797	0.372285	-1.42552	0.00646022	0.0426564
LOC_Os07g05640	Sugar/inositol transporter domain containing protein.	INT2	inositol transporter 2 \\ Inositol transporter presenting conserved extracellular loop domains homologs of plexins/semaphorin/integrin (PSI) domains from animal type I receptors. \\ inositol transporter 2 (INT2); CONTAINS InterPro DOMAIN/s: Sugar transporter, conserved site (InterPro:IPR005829), Major facilitator superfamily (InterPro:IPR020846), General substrate transporter (InterPro:IPR005828)…	19.4438	7.07269	0.36375	-1.45898	0.00546459	0.0377798
LOC_Os07g10090				19.4363	3.37422	0.173604	-2.52613	8.7038e-06	0.000207899
LOC_Os03g50310	Similar to CONSTANS-like protein.	AT1G25440	B-box type zinc finger protein with CCT domain \\ B-box type zinc finger protein with CCT domain; FUNCTIONS IN: sequence-specific DNA binding transcription factor activity, zinc ion binding; INVOLVED IN: regulation of transcription; LOCATED IN: membrane; EXPRESSED IN: leaf; CONTAINS InterPro DOMAIN/s: CCT domain (InterPro:IPR010402), Zinc finger, B-box (InterPro:IPR000315); BEST Arabidopsis thali…	19.4338	6.40414	0.329535	-1.6015	0.00249139	0.020806
LOC_Os03g46110	Hypothetical conserved gene.			18.9509	2.69461	0.142189	-2.81412	2.65301e-05	0.000531763
LOC_Os01g72370	Achaete-scute transcription factor related domain containing protein.	BHLH038	basic helix-loop-helix (bHLH) DNA-binding superfamily protein \\ Encodes a member of the basic helix-loop-helix transcription factor family protein. \\ BHLH038; FUNCTIONS IN: DNA binding, sequence-specific DNA binding transcription factor activity; INVOLVED IN: regulation of transcription; LOCATED IN: nucleus; CONTAINS InterPro DOMAIN/s: Achaete-scute transcription factor related (InterPro:IPR015…	18.9497	2.35854	0.124464	-3.0062	0.000500753	0.00595945
LOC_Os12g02105	Similar to RNA-binding protein 12.			18.9497	5.73092	0.302429	-1.72533	0.00628664	0.0417857
LOC_Os11g29290	Similar to Cytochrome P450 family protein, expressed.	CYP94B3	cytochrome P450, family 94, subfamily B, polypeptide 3 \\ member of CYP94B \\ cytochrome P450, family 94, subfamily B, polypeptide 3 (CYP94B3); FUNCTIONS IN: electron carrier activity, monooxygenase activity, iron ion binding, oxygen binding, heme binding; INVOLVED IN: oxidation reduction; LOCATED IN: endomembrane system; EXPRESSED IN: 14 plant structures; EXPRESSED DURING: 7 growth stages; CONTA…	18.4692	1.68619	0.0912972	-3.45329	7.3262e-06	0.000180742
LOC_Os01g66000	Similar to NADH dehydrogenase I subunit N.	AT5G58260	oxidoreductases, acting on NADH or NADPH, quinone or similar compound as acceptor \\ Encodes subunit NDH-N of NAD(P)H:plastoquinone dehydrogenase complex (Ndh complex) present in the thylakoid membrane of chloroplasts. This subunit is thought to be required for Ndh complex assembly. \\ oxidoreductases, acting on NADH or NADPH, quinone or similar compound as acceptor; FUNCTIONS IN: oxidoreductase …	17.9913	4.04191	0.22466	-2.15419	0.000862782	0.00909623
LOC_Os02g04130	Protein of unknown function DUF1645 family protein.	AT1G70420	Protein of unknown function (DUF1645) \\ Protein of unknown function (DUF1645); CONTAINS InterPro DOMAIN/s: Protein of unknown function DUF1645 (InterPro:IPR012442); BEST Arabidopsis thaliana protein match is: Protein of unknown function (DUF1645) (TAIR:AT1G23710.1); Has 179 Blast hits to 179 proteins in 22 species: Archae - 0; Bacteria - 0; Metazoa - 9; Fungi - 0; Plants - 162; Viruses - 0; Othe…	17.985	4.38534	0.243833	-2.03603	0.00176376	0.0159836
LOC_Os07g35004	Serine/threonine protein kinase-related domain containing protein.	CRK25	cysteine-rich RLK (RECEPTOR-like protein kinase) 25 \\ Encodes a cysteine-rich receptor-like protein kinase. \\ cysteine-rich RLK (RECEPTOR-like protein kinase) 25 (CRK25); FUNCTIONS IN: kinase activity; INVOLVED IN: protein amino acid phosphorylation; LOCATED IN: endomembrane system; EXPRESSED IN: root; CONTAINS InterPro DOMAIN/s: Protein kinase, ATP binding site (InterPro:IPR017441), Protein ki…	17.985	5.73092	0.31865	-1.64996	0.0051347	0.036071
LOC_Os09g38850	EGF-type aspartate/asparagine hydroxylation site domain containing protein.	WAK2	wall-associated kinase 2 \\ cytoplasmic serine/threonine protein kinase induced by salicylic acid. mutant plants exhibit a loss of cell expansion and dependence on sugars and salts for seedling growth, affecting the expression and activity of vacuolar invertase. \\ wall-associated kinase 2 (WAK2); FUNCTIONS IN: protein serine/threonine kinase activity, protein kinase activity, calcium ion binding…	17.4996	3.37237	0.192712	-2.37548	0.00161141	0.0149165
LOC_Os12g34056		ATMG00080.1	ribosomal protein L16 \\ encodes a mitochondrial ribosomal protein L16, which is a constituent of the large ribosomal subunit \\ ribosomal protein L16 (RPL16); CONTAINS InterPro DOMAIN/s: Ribosomal protein L16 (InterPro:IPR000114), Ribosomal protein L10e/L16 (InterPro:IPR016180), Ribosomal protein L16, conserved site (InterPro:IPR020798); BEST Arabidopsis thaliana protein match is: ribosomal prot…	17.4983	3.71408	0.212253	-2.23614	0.000923915	0.00962586
LOC_Os01g13860	Hypothetical conserved gene.			17.4971	1.35369	0.0773669	-3.69214	1.8318e-06	5.62201e-05
LOC_Os06g04940	Early nodulin 93 ENOD93 protein family protein.	AT5G25940	early nodulin-related \\ early nodulin-related; FUNCTIONS IN: molecular_function unknown; LOCATED IN: mitochondrion; EXPRESSED IN: 24 plant structures; EXPRESSED DURING: 16 growth stages; CONTAINS InterPro DOMAIN/s: Early nodulin 93 ENOD93 protein (InterPro:IPR005050); Has 1807 Blast hits to 1807 proteins in 277 species: Archae - 0; Bacteria - 0; Metazoa - 736; Fungi - 347; Plants - 385; Viruses …	17.4958	2.35399	0.134546	-2.89383	0.000298539	0.00393573
LOC_Os02g52650	Similar to Lhca5 protein.	LHCA5	photosystem I light harvesting complex gene 5 \\ Encodes a component of the light harvesting complex of photosystem I. \\ photosystem I light harvesting complex gene 5 (LHCA5); FUNCTIONS IN: pigment binding; INVOLVED IN: photosynthesis, light harvesting in photosystem I, photosynthesis; LOCATED IN: light-harvesting complex, chloroplast thylakoid membrane, photosystem I antenna complex, chloroplas…	17.4933	4.71329	0.269433	-1.892	0.00139952	0.0133669
LOC_Os01g05450	Conserved hypothetical protein.			16.5249	4.0483	0.244981	-2.02926	0.00235972	0.0199785
LOC_Os08g39190	Conserved hypothetical protein.			16.5237	5.04135	0.305098	-1.71266	0.00762661	0.0482151
LOC_Os08g14450	Similar to Sigma factor SIG6.	SIGF	RNApolymerase sigma-subunit F \\ Encodes a general sigma factor in chloroplasts and is probably responsible for the recognition of sigma 70 type standard bacteria-type multi-subunit RNA polymerase (PEP) promoters in young cotyledons. It is a substrate for regulatory phosphorylation by cpCK2, a nuclear-coded plastid-targeted casein kinase 2, that has been implicated as a key component in plant sig…	16.0408	4.37809	0.272935	-1.87337	0.00162808	0.0150331
LOC_Os04g45460	Protein of unknown function DUF26 domain containing protein.	PDLP8	plasmodesmata-located protein 8 \\ Encodes a plasmodesmal protein that may be involved in the intercellular movement of molecules through the plasmodesmata. The protein has two DUF26 domains and a single transmembrane domain. \\ plasmodesmata-located protein 8 (PDLP8); CONTAINS InterPro DOMAIN/s: Protein of unknown function DUF26 (InterPro:IPR002902); BEST Arabidopsis thaliana protein match is: p…	16.0358	4.71881	0.294268	-1.7648	0.00675383	0.0440667
LOC_Os04g37480	Similar to NADPH-dependent codeinone reductase (EC 1.1.1.247).	AT1G59960	NAD(P)-linked oxidoreductase superfamily protein \\ NAD(P)-linked oxidoreductase superfamily protein; FUNCTIONS IN: oxidoreductase activity; INVOLVED IN: response to salt stress; EXPRESSED IN: 21 plant structures; EXPRESSED DURING: 13 growth stages; CONTAINS InterPro DOMAIN/s: Aldo/keto reductase (InterPro:IPR001395), Aldo/keto reductase subgroup (InterPro:IPR020471), Aldo/keto reductase, conserv…	15.5578	3.03902	0.195337	-2.35596	0.000687374	0.00765167
LOC_Os05g05040	Conserved hypothetical protein.			15.5566	4.04007	0.259702	-1.94507	0.00473565	0.033857
LOC_Os04g32620	Pathogenesis-related transcriptional factor and ERF domain containing protein.	Rap2.6L	related to AP2 6l \\ encodes a member of the ERF (ethylene response factor) subfamily B-4 of ERF/AP2 transcription factor family. The protein contains one AP2 domain. There are 7 members in this subfamily. \\ related to AP2 6l (Rap2.6L); FUNCTIONS IN: DNA binding, sequence-specific DNA binding transcription factor activity; INVOLVED IN: regulation of transcription, DNA-dependent; LOCATED IN: nucl…	15.5528	2.35941	0.151703	-2.72068	0.00023122	0.00317681
LOC_Os02g32580	Similar to OSIGBa0142C11.2 protein.	AT2G27830	unknown protein; BEST Arabidopsis thaliana protein match is: unknown protein (TAIR:AT4G22758.1); Has 131 Blast hits to 131 proteins in 17 species: Archae - 0; Bacteria - 0; Metazoa - 0; Fungi - 0; Plants - 131; Viruses - 0; Other Eukaryotes - 0 (source: NCBI BLink).	15.0699	3.02624	0.200814	-2.31607	0.00145651	0.0137912
LOC_Os02g04750	Similar to Beta-amyrin synthase.	CAS1	cycloartenol synthase 1 \\ Involved in the biosynthesis of brassinosteroids. Catalyzes the reaction from epoxysqualene to cycloartenol. \\ cycloartenol synthase 1 (CAS1); FUNCTIONS IN: cycloartenol synthase activity; INVOLVED IN: pentacyclic triterpenoid biosynthetic process, thylakoid membrane organization, pollen development; LOCATED IN: vacuole; EXPRESSED IN: 24 plant structures; EXPRESSED DUR…	15.0699	4.04018	0.268097	-1.89918	0.0044741	0.032494
LOC_Os10g36626	Hypothetical protein.			15.0686	4.71513	0.31291	-1.67618	0.00648025	0.0427214
LOC_Os11g08200	Similar to Aspartic proteinase Asp1 precursor (EC 3.4.23.-) (OsAsp1) (Nucellin- like protein).	AT4G33490	Eukaryotic aspartyl protease family protein \\ Eukaryotic aspartyl protease family protein; FUNCTIONS IN: aspartic-type endopeptidase activity; INVOLVED IN: proteolysis; LOCATED IN: endomembrane system; EXPRESSED IN: 22 plant structures; EXPRESSED DURING: 13 growth stages; CONTAINS InterPro DOMAIN/s: Peptidase aspartic (InterPro:IPR021109), Peptidase aspartic, catalytic (InterPro:IPR009007), Pept…	15.0661	4.03834	0.268041	-1.89947	0.0041465	0.0307236
LOC_Os03g15710	Six-bladed beta-propeller, TolB-like domain containing protein.	LAP3	Calcium-dependent phosphotriesterase superfamily protein \\ Calcium-dependent phosphotriesterase superfamily protein; FUNCTIONS IN: strictosidine synthase activity; INVOLVED IN: alkaloid biosynthetic process, pollen exine formation; LOCATED IN: endomembrane system; EXPRESSED IN: 12 plant structures; EXPRESSED DURING: 6 growth stages; CONTAINS InterPro DOMAIN/s: Strictosidine synthase, conserved r…	14.5844	2.70002	0.18513	-2.43339	0.00136298	0.0131012
LOC_Os07g26720		ARR9	response regulator 9 \\ response regulator ARR9, A two-component response regulator-like protein with a receiver domain with a conserved aspartate residue and a possible phosphorylation site and at the N-terminal half. Appears to interact with histidine kinase like genes ATHP3 and ATHP2 \\ response regulator 9 (ARR9); CONTAINS InterPro DOMAIN/s: CheY-like (InterPro:IPR011006), Signal transduction…	14.5819	4.37624	0.300114	-1.73642	0.00585194	0.0396071
LOC_Os10g38580	Similar to Tau class GST protein 3.	GSTU18	glutathione S-transferase TAU 18 \\ Encodes glutathione transferase belonging to the tau class of GSTs. Naming convention according to Wagner et al. (2002). \\ glutathione S-transferase TAU 18 (GSTU18); CONTAINS InterPro DOMAIN/s: Thioredoxin fold (InterPro:IPR012335), Glutathione S-transferase, C-terminal (InterPro:IPR004046), Glutathione S-transferase, C-terminal-like (InterPro:IPR010987), Glut…	14.1002	4.04559	0.286917	-1.8013	0.0061399	0.0410121
LOC_Os04g43610	Similar to OSIGBa0115M15.10 protein.	AT3G32021	transposable element gene \\ CACTA-like transposase family (En/Spm), has a 1.8e-154 P-value blast match to GB:AAA66266 unknown protein ORF1 transposable element En-1 (CACTA-element) (Zea mays)	14.0977	3.69946	0.262415	-1.93008	0.00454	0.0328165
LOC_Os03g18330		AT5G05550	sequence-specific DNA binding transcription factors \\ sequence-specific DNA binding transcription factors; BEST Arabidopsis thaliana protein match is: sequence-specific DNA binding transcription factors (TAIR:AT3G11100.1); Has 30201 Blast hits to 17322 proteins in 780 species: Archae - 12; Bacteria - 1396; Metazoa - 17338; Fungi - 3422; Plants - 5037; Viruses - 0; Other Eukaryotes - 2996 (source…	14.0915	2.02421	0.143647	-2.7994	0.000535089	0.00630426
LOC_Os07g10070		AT1G35940	transposable element gene \\ similar to unknown protein [Arabidopsis thaliana] (TAIR:AT3G13250.1); similar to unknown protein [Arabidopsis thaliana] (TAIR:AT3G30560.1); similar to AT hook motif-containing protein-related [Arabidopsis thaliana] (TAIR:AT3G42100.1); similar to hypothetical protein 27.t00039 [Brassica oleracea] (GB:ABD65060.1); similar to hypothetical protein 31.t00030 [Brassica oler…	13.1269	3.37963	0.257459	-1.95759	0.00600399	0.0403936
LOC_Os03g19070	Similar to Long cell-linked locus protein.	AT5G38700	unknown protein; FUNCTIONS IN: molecular_function unknown; INVOLVED IN: biological_process unknown; LOCATED IN: mitochondrion; EXPRESSED IN: 10 plant structures; EXPRESSED DURING: LP.04 four leaves visible, LP.10 ten leaves visible, petal differentiation and expansion stage, LP.08 eight leaves visible, LP.12 twelve leaves visible; BEST Arabidopsis thaliana protein match is: unknown protein (TAIR:…	13.1244	1.68619	0.128478	-2.96041	0.000590518	0.00682059
LOC_Os06g11150	Protein of unknown function DUF1645 family protein.			12.6352	2.70013	0.2137	-2.22634	0.00600992	0.0404235
LOC_Os09g11480	Similar to Ethylene-responsive transcription factor 5 (Ethylene-responsive element binding factor 5) (EREBP-5) (AtERF5).	HRE1	Integrase-type DNA-binding superfamily protein \\ encodes a member of the ERF (ethylene response factor) subfamily B-2 of ERF/AP2 transcription factor family. The protein contains one AP2 domain. There are 5 members in this subfamily including RAP2.2 AND RAP2.12. \\ HYPOXIA RESPONSIVE ERF (ETHYLENE RESPONSE FACTOR) 1 (HRE1); CONTAINS InterPro DOMAIN/s: DNA-binding, integrase-type (InterPro:IPR016…	12.6339	1.68348	0.133251	-2.90778	0.00153447	0.0143467
LOC_Os09g37690	Flavin-containing monooxygenase FMO family protein.	FMO1	flavin-dependent monooxygenase 1 \\ FMO1 is required for full expression of TIR-NB-LRRconditioned resistance to avirulent pathogens and for basal resistance to invasive virulent pathogens. Functions in an EDS1-regulated but SA-independent mechanism that promotes resistance and cell death at pathogen infection sites. \\ flavin-dependent monooxygenase 1 (FMO1); FUNCTIONS IN: NADP or NADPH binding, …	12.151	2.35756	0.194022	-2.3657	0.00103894	0.0105927
LOC_Os12g14650				12.1497	2.69829	0.222086	-2.17081	0.00244009	0.0204963
LOC_Os12g32610	Conserved hypothetical protein.			12.1435	0.675926	0.0556615	-4.16718	0.00475385	0.0339423
LOC_Os08g43620	Conserved hypothetical protein.			11.6693	1.68164	0.144108	-2.79478	0.00175473	0.0159216
LOC_Os03g45250	Similar to Cupin, RmlC-type.	AT5G39890	Protein of unknown function (DUF1637) \\ Protein of unknown function (DUF1637); FUNCTIONS IN: cysteamine dioxygenase activity; INVOLVED IN: oxidation reduction; LOCATED IN: cellular_component unknown; EXPRESSED IN: 24 plant structures; EXPRESSED DURING: 15 growth stages; CONTAINS InterPro DOMAIN/s: Protein of unknown function DUF1637 (InterPro:IPR012864); BEST Arabidopsis thaliana protein match i…	11.1764	0.337042	0.0301566	-5.05138	0.00037243	0.00470128
LOC_Os06g50070	Conserved hypothetical protein.			11.1751	2.01413	0.180234	-2.47206	0.0041966	0.0309624
LOC_Os03g45210	Protein of unknown function DUF1637 family protein.	AT1G18490	Protein of unknown function (DUF1637) \\ Protein of unknown function (DUF1637); FUNCTIONS IN: cysteamine dioxygenase activity; INVOLVED IN: oxidation reduction; LOCATED IN: cellular_component unknown; EXPRESSED IN: 22 plant structures; EXPRESSED DURING: 13 growth stages; CONTAINS InterPro DOMAIN/s: Protein of unknown function DUF1637 (InterPro:IPR012864); BEST Arabidopsis thaliana protein match i…	10.6947	1.01297	0.094717	-3.40023	0.000781445	0.008433
LOC_Os06g47640	EF-Hand type domain containing protein.	AT3G10190	Calcium-binding EF-hand family protein \\ Calcium-binding EF-hand family protein; FUNCTIONS IN: calcium ion binding; INVOLVED IN: biological_process unknown; LOCATED IN: plasma membrane; EXPRESSED IN: 18 plant structures; EXPRESSED DURING: 8 growth stages; CONTAINS InterPro DOMAIN/s: EF-Hand 1, calcium-binding site (InterPro:IPR018247), EF-HAND 2 (InterPro:IPR018249), EF-hand-like domain (InterPr…	10.2092	1.01026	0.0989557	-3.33707	0.000357434	0.0045631
LOC_Os02g03400	MAP65/ASE1 family protein.	PLE	Microtubule associated protein (MAP65/ASE1) family protein \\ Mutant has defective roots. Essential for giant cell ontogenesis. Role in organizing the mitotic microtubule array during both early and late mitosis in all plant organs. \\ PLEIADE (PLE); CONTAINS InterPro DOMAIN/s: Microtubule-associated protein, MAP65/ASE1-type (InterPro:IPR007145); BEST Arabidopsis thaliana protein match is: microt…	10.2055	0.338884	0.0332061	-4.91241	0.000142058	0.00215672
LOC_Os06g10109	Conserved hypothetical protein.			9.72129	1.35554	0.13944	-2.84228	0.00692701	0.0448944
LOC_Os06g03030	Conserved hypothetical protein.			9.72004	1.34915	0.1388	-2.84892	0.00693948	0.0449214
LOC_Os01g21380	FAD dependent oxidoreductase family protein.	AT2G24580	FAD-dependent oxidoreductase family protein \\ FAD-dependent oxidoreductase family protein; FUNCTIONS IN: sarcosine oxidase activity; INVOLVED IN: tetrahydrofolate metabolic process, oxidation reduction; LOCATED IN: cellular_component unknown; EXPRESSED IN: 23 plant structures; EXPRESSED DURING: 13 growth stages; CONTAINS InterPro DOMAIN/s: FAD dependent oxidoreductase (InterPro:IPR006076), Sarco…	9.71505	1.0121	0.104179	-3.26286	0.00195502	0.0172301
LOC_Os02g36840	Similar to H0815C01.4 protein.	UGT85A2	UDP-glucosyl transferase 85A2 \\ UDP-glucosyl transferase 85A2 (UGT85A2); FUNCTIONS IN: UDP-glycosyltransferase activity, transferase activity, transferring glycosyl groups, glucuronosyltransferase activity; INVOLVED IN: metabolic process; LOCATED IN: cellular_component unknown; EXPRESSED IN: 21 plant structures; EXPRESSED DURING: 11 growth stages; CONTAINS InterPro DOMAIN/s: UDP-glucuronosyl/UDP…	9.23211	1.3446	0.145644	-2.77949	0.00334789	0.0259603
LOC_Os03g46780	Conserved hypothetical protein.			8.25873	1.01481	0.122877	-3.02471	0.00601207	0.0404279
LOC_Os04g32010	Similar to OSIGBa0096P03.6 protein.	CSR1	chlorsulfuron/imidazolinone resistant 1 \\ Catalyzes the formation of acetolactate from pyruvate, the first step in valine and isoleucine biosynthesis. Requires FAD, thiamine pyrophosphate and Mg. Inhibited by the sulphonylurea herbicide, chlorsulphuron, and the imidazolinone herbicide, imazapyr. The obtained crystal structure of acetohydroxyacid synthase AHAS, EC 2.2.1.6)in complex with herbicid…	7.78078	0.334335	0.0429694	-4.54055	0.00103421	0.0105564
LOC_Os02g49870	Similar to Threonine endopeptidase.	AT4G01150	unknown protein; FUNCTIONS IN: molecular_function unknown; INVOLVED IN: biological_process unknown; LOCATED IN: thylakoid, chloroplast thylakoid membrane, chloroplast, plastoglobule, chloroplast envelope; EXPRESSED IN: 23 plant structures; EXPRESSED DURING: 14 growth stages; BEST Arabidopsis thaliana protein match is: unknown protein (TAIR:AT4G38100.1); Has 323 Blast hits to 323 proteins in 59 sp…	7.77953	0.338884	0.043561	-4.52082	0.000645199	0.00728719
LOC_Os04g16834		AT4G11175	Nucleic acid-binding, OB-fold-like protein \\ Nucleic acid-binding, OB-fold-like protein; FUNCTIONS IN: RNA binding, translation initiation factor activity; INVOLVED IN: translational initiation; LOCATED IN: chloroplast; EXPRESSED IN: 22 plant structures; EXPRESSED DURING: 13 growth stages; CONTAINS InterPro DOMAIN/s: Nucleic acid-binding, OB-fold-like (InterPro:IPR016027), Nucleic acid-binding, …	7.77579	0	0	-20	0.0028538	0.0230065
LOC_Os11g45600		AT3G14470	NB-ARC domain-containing disease resistance protein \\ NB-ARC domain-containing disease resistance protein; FUNCTIONS IN: protein binding; INVOLVED IN: apoptosis, defense response; LOCATED IN: endomembrane system; EXPRESSED IN: 23 plant structures; EXPRESSED DURING: 14 growth stages; CONTAINS InterPro DOMAIN/s: Leucine-rich repeat-containing protein (InterPro:IPR015766), NB-ARC (InterPro:IPR00218…	6.31946	0.334335	0.0529057	-4.24043	0.00692516	0.0448932
LOC_Os04g48350	Similar to CRT/DRE binding factor 1.	DREB1A	dehydration response element B1A \\ encodes a member of the DREB subfamily A-1 of ERF/AP2 transcription factor family (CBF3). The protein contains one AP2 domain. There are six members in this subfamily, including CBF1, CBF2, and CBF3. This gene is involved in response to low temperature and abscisic acid. \\ dehydration response element B1A (DREB1A); CONTAINS InterPro DOMAIN/s: DNA-binding, inte…	6.31572	0.334335	0.052937	-4.23958	0.00581734	0.0394421
LOC_Os11g17380	Similar to Protein kinase domain containing protein, expressed.	CRK16	cysteine-rich RLK (RECEPTOR-like protein kinase) 16 \\ Encodes a cysteine-rich receptor-like protein kinase. \\ cysteine-rich RLK (RECEPTOR-like protein kinase) 16 (CRK16); FUNCTIONS IN: protein serine/threonine kinase activity, protein kinase activity, ATP binding; INVOLVED IN: protein amino acid phosphorylation; EXPRESSED IN: 13 plant structures; EXPRESSED DURING: 10 growth stages; CONTAINS Int…	4.86065	0	0	-20	0.00483038	0.0343707

## Sheet: Table S4
AccID	Description	Blast_Symbol	Blast_Description	WT_4mm	osvil2_4mm	FoldChange	Log2FC	P-Value	FDR
LOC_Os07g34570	Similar to Thiazole biosynthetic enzyme 1-1, chloroplast precursor.	THI1	thiazole biosynthetic enzyme, chloroplast (ARA6) (THI1) (THI4) \\ Encodes a thiamine biosynthetic gene that has a dual function in thiamine biosynthesis and mitochondrial DNA damage tolerance. It appears to be involved in producing the thiazole portion of thiamine (vitamin B1). A crystal structure of the protein reveals that it forms a 2-ring homo-octamer. \\ THI1; FUNCTIONS IN: protein homodimer…	5847.82	13362.7	2.28507	1.19224	1.43094e-22	3.2257e-20
LOC_Os06g22960	Delta-tonoplast intrinsic protein.	DELTA-TIP	delta tonoplast integral protein \\ Delta tonoplast intrinsic protein, functions as a water channel and ammonium (NH3) transporter. Highly expressed in flower, shoot, and stem. Expression shows diurnal regulation and is induced by ammonium (NH3). Protein localized to vacuolar membrane. \\ delta tonoplast integral protein (DELTA-TIP); FUNCTIONS IN: water channel activity, ammonia transmembrane tra…	2553.37	6575.82	2.57535	1.36477	2.81973e-06	7.49279e-05
LOC_Os04g02530	Conserved hypothetical protein.			2197.76	4404.68	2.00417	1.003	0.00124876	0.0133147
LOC_Os09g07154	Conserved hypothetical protein.			1457.06	2982.17	2.04671	1.0333	0.00277217	0.0247819
LOC_Os04g47220	Similar to Aquaporin PIP1.1.	PIP1;4	plasma membrane intrinsic protein 1;4 \\ a member of the plasma membrane intrinsic protein subfamily PIP1. \\ plasma membrane intrinsic protein 1;4 (PIP1;4); FUNCTIONS IN: water channel activity; INVOLVED IN: response to water deprivation, transport; LOCATED IN: plasma membrane, membrane; EXPRESSED IN: 23 plant structures; EXPRESSED DURING: 13 growth stages; CONTAINS InterPro DOMAIN/s: Major intr…	1178.09	2952.22	2.50593	1.32535	0.000211798	0.00313079
LOC_Os03g19220	Lg106-like family protein.	AT4G16146	cAMP-regulated phosphoprotein 19-related protein \\ cAMP-regulated phosphoprotein 19-related protein; FUNCTIONS IN: molecular_function unknown; INVOLVED IN: biological_process unknown; LOCATED IN: cellular_component unknown; EXPRESSED IN: 24 plant structures; EXPRESSED DURING: 13 growth stages; CONTAINS InterPro DOMAIN/s: cAMP-regulated phosphoprotein/endosulphine conserved region (InterPro:IPR00…	1053.59	2230.38	2.11693	1.08197	3.19085e-12	2.68896e-10
LOC_Os03g53150	Aux /IAA protein.	IAA16	indoleacetic acid-induced protein 16 \\ early auxin-induced (IAA16) \\ indoleacetic acid-induced protein 16 (IAA16); FUNCTIONS IN: sequence-specific DNA binding transcription factor activity; INVOLVED IN: response to auxin stimulus; LOCATED IN: nucleus; EXPRESSED IN: 22 plant structures; EXPRESSED DURING: 13 growth stages; CONTAINS InterPro DOMAIN/s: Aux/IAA-ARF-dimerisation (InterPro:IPR011525),…	1023.36	2067.79	2.02058	1.01477	1.47861e-40	1.05258e-37
LOC_Os03g51650	Protein of unknown function DUF81 domain containing protein.	AT2G36630	Sulfite exporter TauE/SafE family protein \\ Sulfite exporter TauE/SafE family protein; INVOLVED IN: N-terminal protein myristoylation; LOCATED IN: endomembrane system, integral to membrane; EXPRESSED IN: 22 plant structures; EXPRESSED DURING: 15 growth stages; CONTAINS InterPro DOMAIN/s: Protein of unknown function DUF81 (InterPro:IPR002781); BEST Arabidopsis thaliana protein match is: Sulfite e…	794.197	1642.66	2.06833	1.04847	3.5938e-05	0.000699899
LOC_Os10g40614	Plant lipid transfer protein and hydrophobic protein, helical domain containing protein.	AT4G12520	Bifunctional inhibitor/lipid-transfer protein/seed storage 2S albumin superfamily protein \\ Bifunctional inhibitor/lipid-transfer protein/seed storage 2S albumin superfamily protein; FUNCTIONS IN: lipid binding; INVOLVED IN: lipid transport; LOCATED IN: endomembrane system; CONTAINS InterPro DOMAIN/s: Bifunctional inhibitor/plant lipid transfer protein/seed storage (InterPro:IPR016140), Plant li…	735.846	1490.9	2.0261	1.01871	1.2125e-08	5.72415e-07
LOC_Os03g18870	Similar to Chaperone protein dnaJ.	AT1G56300	Chaperone DnaJ-domain superfamily protein \\ Chaperone DnaJ-domain superfamily protein; FUNCTIONS IN: heat shock protein binding; INVOLVED IN: protein folding, response to cyclopentenone; LOCATED IN: cellular_component unknown; EXPRESSED IN: 23 plant structures; EXPRESSED DURING: 15 growth stages; CONTAINS InterPro DOMAIN/s: Molecular chaperone, heat shock protein, Hsp40, DnaJ (InterPro:IPR015609…	696.11	1450.94	2.08435	1.0596	1.25362e-34	6.27994e-32
LOC_Os04g59150	Peroxidase (EC 1.11.1.7).	AT1G71695	Peroxidase superfamily protein \\ Peroxidase superfamily protein; FUNCTIONS IN: peroxidase activity, heme binding; INVOLVED IN: response to oxidative stress, oxidation reduction; LOCATED IN: cell wall, vacuole, membrane, plant-type cell wall; EXPRESSED IN: 23 plant structures; EXPRESSED DURING: 13 growth stages; CONTAINS InterPro DOMAIN/s: Haem peroxidase (InterPro:IPR010255), Plant peroxidase (I…	683.577	1414.64	2.06946	1.04926	4.47291e-08	1.86436e-06
LOC_Os05g33570	Orthophosphate dikinase precursor (EC 2.7.9.1).	PPDK	pyruvate orthophosphate dikinase \\ The product of this long transcript was shown to be targeted to the chloroplast, whereas the shorter transcript (no targeting sequence) accumulates in the cytosol. They were also found in slightly different tissues. \\ pyruvate orthophosphate dikinase (PPDK); FUNCTIONS IN: kinase activity, pyruvate, phosphate dikinase activity; INVOLVED IN: phosphorylation, res…	667.534	1391.37	2.08435	1.0596	2.61058e-09	1.39839e-07
LOC_Os05g05354	PDZ/DHR/GLGF domain containing protein.			430.195	1207.25	2.80629	1.48866	6.02412e-15	7.34005e-13
LOC_Os09g26620	Dormancyauxin associated family protein.	AT1G56220	Dormancy/auxin associated family protein \\ Dormancy/auxin associated family protein; CONTAINS InterPro DOMAIN/s: Dormancyauxin associated (InterPro:IPR008406); BEST Arabidopsis thaliana protein match is: Dormancy/auxin associated family protein (TAIR:AT1G54070.1); Has 196 Blast hits to 195 proteins in 36 species: Archae - 0; Bacteria - 0; Metazoa - 1; Fungi - 0; Plants - 194; Viruses - 0; Other …	479.015	1180.21	2.46382	1.30089	0.00339336	0.029215
LOC_Os06g11840	Similar to Ramosa 3 (Fragment).	TPPB	trehalose-6-phosphate phosphatase \\ homologous to the C-terminal part of microbial trehalose-6-phosphate phosphatases \\ trehalose-6-phosphate phosphatase (TPPB); CONTAINS InterPro DOMAIN/s: HAD-superfamily hydrolase, subfamily IIB (InterPro:IPR006379), Trehalose-phosphatase (InterPro:IPR003337); BEST Arabidopsis thaliana protein match is: Haloacid dehalogenase-like hydrolase (HAD) superfamily p…	488.579	1117.86	2.28799	1.19408	1.11298e-13	1.11508e-11
LOC_Os06g36560	Similar to Myo-inositol oxygenase.	MIOX1	myo-inositol oxygenase 1 \\ Encodes MIOX1. Belongs to myo-inositol oxygenase gene family. \\ myo-inositol oxygenase 1 (MIOX1); FUNCTIONS IN: inositol oxygenase activity, oxidoreductase activity; INVOLVED IN: syncytium formation; LOCATED IN: cytoplasm; EXPRESSED IN: 6 plant structures; CONTAINS InterPro DOMAIN/s: Protein of unknown function DUF706 (InterPro:IPR007828); BEST Arabidopsis thaliana pr…	173.793	1102.7	6.3449	2.6656	0.000370937	0.00499178
LOC_Os11g31700	Conserved hypothetical protein.			477.539	1060.06	2.21984	1.15046	7.07302e-39	4.55553e-36
LOC_Os02g49420	FAS1 domain domain containing protein.	FLA2	FASCICLIN-like arabinogalactan 2 \\ AF333971 Arabidopsis thaliana fasciclin-like arabinogalactan-protein 2 (Fla2) mRNA, complete cds \\ FASCICLIN-like arabinogalactan 2 (FLA2); INVOLVED IN: response to cyclopentenone; LOCATED IN: anchored to plasma membrane, plasma membrane, anchored to membrane, membrane; EXPRESSED IN: 25 plant structures; EXPRESSED DURING: 13 growth stages; CONTAINS InterPro DO…	487.407	1047.76	2.14966	1.10411	2.96406e-15	3.74677e-13
LOC_Os03g33090	Similar to LOB domain protein 39.	LBD37	LOB domain-containing protein 37 \\ LOB domain-containing protein 37 (LBD37); CONTAINS InterPro DOMAIN/s: Lateral organ boundaries, LOB (InterPro:IPR004883); BEST Arabidopsis thaliana protein match is: LOB domain-containing protein 38 (TAIR:AT3G49940.1); Has 1807 Blast hits to 1807 proteins in 277 species: Archae - 0; Bacteria - 0; Metazoa - 736; Fungi - 347; Plants - 385; Viruses - 0; Other Euka…	441.692	1014.12	2.29599	1.19912	5.16847e-38	3.17755e-35
LOC_Os03g02550	Cyclin-like F-box domain containing protein.	PP2-A13	phloem protein 2-A13 \\ phloem protein 2-A13 (PP2-A13); FUNCTIONS IN: carbohydrate binding; INVOLVED IN: N-terminal protein myristoylation, response to wounding; EXPRESSED IN: 24 plant structures; EXPRESSED DURING: 15 growth stages; CONTAINS InterPro DOMAIN/s: F-box domain, cyclin-like (InterPro:IPR001810), F-box domain, Skp2-like (InterPro:IPR022364); BEST Arabidopsis thaliana protein match is: …	366.394	973.715	2.65756	1.4101	0.00139605	0.0145248
LOC_Os01g54340	Similar to Plant-specific domain TIGR01615 family protein.	AT4G32480	Protein of unknown function (DUF506) \\ Protein of unknown function (DUF506) ; FUNCTIONS IN: molecular_function unknown; INVOLVED IN: biological_process unknown; LOCATED IN: cellular_component unknown; EXPRESSED IN: cultured cell; CONTAINS InterPro DOMAIN/s: Protein of unknown function DUF506, plant (InterPro:IPR006502); BEST Arabidopsis thaliana protein match is: Protein of unknown function (DUF…	399.601	913.72	2.28658	1.19319	2.35609e-05	0.000488126
LOC_Os06g22050				388.819	839.184	2.15829	1.10989	9.37377e-20	1.7857e-17
LOC_Os12g31860	Similar to Allantoin permease.	UPS2	ureide permease 2 \\ Mediate high-affinity uracil and 5-FU (a toxic uracil analogue) transport when expressed in yeast and Xenopus oocytes.Involved in allantoin transport. \\ ureide permease 2 (UPS2); FUNCTIONS IN: uracil:cation symporter activity; LOCATED IN: plasma membrane; EXPRESSED IN: 25 plant structures; EXPRESSED DURING: 10 growth stages; BEST Arabidopsis thaliana protein match is: ureide…	342.981	795.192	2.31847	1.21317	3.09748e-05	0.00061636
LOC_Os03g63950	Similar to Plastid-specific 30S ribosomal protein 1, chloroplast precursor (CS- S5) (CS5) (S22) (Ribosomal protein 1) (PSRP-1).	AT5G24490	30S ribosomal protein, putative \\ 30S ribosomal protein, putative; FUNCTIONS IN: structural constituent of ribosome, binding; INVOLVED IN: translation, primary metabolic process; LOCATED IN: ribosome, chloroplast; EXPRESSED IN: 22 plant structures; EXPRESSED DURING: 13 growth stages; CONTAINS InterPro DOMAIN/s: Ribosomal protein S30Ae/sigma 54 modulation protein (InterPro:IPR003489); Has 30201 B…	342.689	773.063	2.25587	1.17368	8.74542e-06	0.000205358
LOC_Os04g49260	Heavy metal transport/detoxification protein domain containing protein.	AT4G27590	Heavy metal transport/detoxification superfamily protein \\ Heavy metal transport/detoxification superfamily protein ; FUNCTIONS IN: copper ion binding, metal ion binding; INVOLVED IN: copper ion transport, metal ion transport; LOCATED IN: cellular_component unknown; EXPRESSED IN: 8 plant structures; EXPRESSED DURING: 6 growth stages; CONTAINS InterPro DOMAIN/s: Heavy metal transport/detoxificati…	305.38	706.572	2.31375	1.21023	1.80569e-08	8.18184e-07
LOC_Os11g45990	von Willebrand factor, type A domain containing protein.	AT2G38970	Zinc finger (C3HC4-type RING finger) family protein \\ Zinc finger (C3HC4-type RING finger) family protein; FUNCTIONS IN: ubiquitin-protein ligase activity, zinc ion binding; EXPRESSED IN: 22 plant structures; EXPRESSED DURING: 13 growth stages; CONTAINS InterPro DOMAIN/s: Zinc finger, RING-type (InterPro:IPR001841), Zinc finger, C3HC4 RING-type (InterPro:IPR018957), von Willebrand factor, type A…	126.193	699.146	5.5403	2.46996	0.00396768	0.0328789
LOC_Os03g55590	Homeodomain-like containing protein.	AT4G37180	Homeodomain-like superfamily protein \\ myb family transcription factor, contains Pfam domain, PF00249: Myb-like DNA-binding domain l; also isolated as a putative cytoskeletal protein in a yeast screen \\ Homeodomain-like superfamily protein; CONTAINS InterPro DOMAIN/s: Homeodomain-like (InterPro:IPR009057), Myb, DNA-binding (InterPro:IPR014778), Myb-like DNA-binding domain, SHAQKYF class (InterP…	294.631	621.118	2.10812	1.07595	0.00050648	0.00642024
LOC_Os08g32310				245.098	617.279	2.5185	1.33256	1.25893e-37	7.2458e-35
LOC_Os03g26870	Similar to Salt-responsive WD40 protein 5.	AT1G78070	Transducin/WD40 repeat-like superfamily protein \\ Transducin/WD40 repeat-like superfamily protein; CONTAINS InterPro DOMAIN/s: WD40 repeat 2 (InterPro:IPR019782), WD40 repeat-like-containing domain (InterPro:IPR011046), WD40 repeat, conserved site (InterPro:IPR019775), WD40-repeat-containing domain (InterPro:IPR017986), WD40/YVTN repeat-like-containing domain (InterPro:IPR015943), WD40 repeat (I…	282.927	612.331	2.16427	1.11388	2.6601e-23	6.25725e-21
LOC_Os07g41410	Similar to EGG APPARATUS-1 protein (ZmEA1).			187.021	479.557	2.56419	1.3585	2.39598e-19	4.37931e-17
LOC_Os09g07130				229.468	469.202	2.04474	1.03192	4.63716e-05	0.000872929
LOC_Os04g59260	Similar to Peroxidase (EC 1.11.1.7).	AT1G71695	Peroxidase superfamily protein \\ Peroxidase superfamily protein; FUNCTIONS IN: peroxidase activity, heme binding; INVOLVED IN: response to oxidative stress, oxidation reduction; LOCATED IN: cell wall, vacuole, membrane, plant-type cell wall; EXPRESSED IN: 23 plant structures; EXPRESSED DURING: 13 growth stages; CONTAINS InterPro DOMAIN/s: Haem peroxidase (InterPro:IPR010255), Plant peroxidase (I…	186.43	425.762	2.28376	1.19141	2.30169e-10	1.48599e-08
LOC_Os04g45290	Similar to Beta-fructofuranosidase 1 precursor (EC 3.2.1.26) (Sucrose 1) (Invertase 1).	ATBETAFRUCT4	Glycosyl hydrolases family 32 protein \\ ATBETAFRUCT4; FUNCTIONS IN: hydrolase activity, hydrolyzing O-glycosyl compounds, beta-fructofuranosidase activity; INVOLVED IN: sucrose catabolic process, using beta-fructofuranosidase, carbohydrate metabolic process; LOCATED IN: vacuole, plant-type cell wall; EXPRESSED IN: 25 plant structures; EXPRESSED DURING: 16 growth stages; CONTAINS InterPro DOMAIN/…	209.126	419.203	2.00455	1.00328	9.92877e-09	4.77057e-07
LOC_Os12g24020	Similar to senescence-associated protein DIN1.	STR18	sulfurtransferase 18 \\ Encodes a thiosulfate sulfurtransferase/rhodanese. \\ sulfurtransferase 18 (STR18); CONTAINS InterPro DOMAIN/s: Rhodanese-like (InterPro:IPR001763); BEST Arabidopsis thaliana protein match is: Rhodanese/Cell cycle control phosphatase superfamily protein (TAIR:AT2G17850.1); Has 200 Blast hits to 200 proteins in 47 species: Archae - 2; Bacteria - 43; Metazoa - 0; Fungi - 0; …	65.3413	416.898	6.38031	2.67363	6.16907e-05	0.00110736
LOC_Os01g50680	Peptidase S8/S53, subtilisin/kexin/sedolisin domain containing protein.	SBT5.4	Subtilase family protein \\ SBT5.4; FUNCTIONS IN: identical protein binding, serine-type endopeptidase activity; INVOLVED IN: proteolysis, negative regulation of catalytic activity; EXPRESSED IN: 12 plant structures; EXPRESSED DURING: 4 anthesis, C globular stage, petal differentiation and expansion stage; CONTAINS InterPro DOMAIN/s: Protease-associated PA (InterPro:IPR003137), Proteinase inhibit…	193.603	411.208	2.12398	1.08677	0.000109548	0.00178088
LOC_Os06g22394	Conserved hypothetical protein.			136.011	323.528	2.37868	1.25016	0.000701506	0.00834863
LOC_Os03g15920	Conserved hypothetical protein.	MEE59	maternal effect embryo arrest 59 \\ maternal effect embryo arrest 59 (MEE59); Has 70 Blast hits to 70 proteins in 15 species: Archae - 0; Bacteria - 0; Metazoa - 0; Fungi - 0; Plants - 70; Viruses - 0; Other Eukaryotes - 0 (source: NCBI BLink).	118.517	310.203	2.61736	1.38811	1.02159e-13	1.03891e-11
LOC_Os02g33820	Similar to Abscisic stress ripening protein 1.			139.279	302.862	2.17449	1.12068	6.4769e-05	0.00115572
LOC_Os01g46040	Bromodomain containing protein.	GTE3	global transcription factor group E3 \\ Bromodomain and extra terminal domain family protein. Binds to acetyl-histone H3. Binding is reduced when GTE3 is SUMOylated by SIZ1. \\ global transcription factor group E3 (GTE3); FUNCTIONS IN: histone binding, DNA binding; LOCATED IN: chloroplast; EXPRESSED IN: 21 plant structures; EXPRESSED DURING: 13 growth stages; CONTAINS InterPro DOMAIN/s: Bromodoma…	133.359	286.832	2.15083	1.10489	9.07175e-17	1.3123e-14
LOC_Os04g36650	Hypothetical conserved gene.	ZFP3	zinc finger protein 3 \\ Encodes a zinc finger protein containing only a single zinc finger. \\ zinc finger protein 3 (ZFP3); FUNCTIONS IN: sequence-specific DNA binding transcription factor activity, zinc ion binding, nucleic acid binding; INVOLVED IN: regulation of transcription; LOCATED IN: intracellular; EXPRESSED IN: shoot apex, hypocotyl, root, flower; EXPRESSED DURING: petal differentiatio…	126.198	262.178	2.07751	1.05486	9.94411e-13	8.84862e-11
LOC_Os04g46060	Similar to WRKY transcription factor 34.	AT2G44745	WRKY family transcription factor \\ WRKY family transcription factor; CONTAINS InterPro DOMAIN/s: DNA-binding WRKY (InterPro:IPR003657); BEST Arabidopsis thaliana protein match is: WRKY DNA-binding protein 13 (TAIR:AT4G39410.1); Has 3506 Blast hits to 3049 proteins in 189 species: Archae - 0; Bacteria - 0; Metazoa - 0; Fungi - 0; Plants - 3483; Viruses - 0; Other Eukaryotes - 23 (source: NCBI BLi…	115.976	254.682	2.19598	1.13487	7.44988e-16	9.83057e-14
LOC_Os07g40380	Hypothetical conserved gene.			96.2199	250.816	2.6067	1.38222	1.14566e-10	7.7285e-09
LOC_Os03g03034	Similar to Flavanone 3-hydroxylase-like protein.	DMR6	2-oxoglutarate (2OG) and Fe(II)-dependent oxygenase superfamily protein \\ Encodes a putative 2OG-Fe(II) oxygenase that is defense-associated but required for susceptibility to downy mildew. \\ DOWNY MILDEW RESISTANT 6 (DMR6); FUNCTIONS IN: oxidoreductase activity, acting on paired donors, with incorporation or reduction of molecular oxygen, 2-oxoglutarate as one donor, and incorporation of one a…	112.257	240.559	2.14294	1.09959	6.27672e-09	3.10974e-07
LOC_Os02g44108	Beta-expansin.	EXPB4	expansin B4 \\ member of BETA-EXPANSINS. Naming convention from the Expansin Working Group (Kende et al, 2004. Plant Mol Bio) \\ expansin B4 (EXPB4); INVOLVED IN: plant-type cell wall modification involved in multidimensional cell growth, unidimensional cell growth, plant-type cell wall loosening; LOCATED IN: endomembrane system, extracellular region; CONTAINS InterPro DOMAIN/s: Barwin-related en…	75.8309	223.347	2.94532	1.55843	2.03615e-08	9.08907e-07
LOC_Os03g22050	Similar to Serine/threonine protein kinase.	SIP1	SOS3-interacting protein 1 \\ Encodes a CBL-interacting protein kinase with similarity to SOS protein kinase. \\ SOS3-interacting protein 1 (SIP1); FUNCTIONS IN: protein serine/threonine kinase activity, protein kinase activity, kinase activity, ATP binding; INVOLVED IN: signal transduction, protein amino acid phosphorylation; LOCATED IN: cellular_component unknown; EXPRESSED IN: 23 plant structu…	100.407	217.124	2.16245	1.11267	3.83153e-14	4.19623e-12
LOC_Os01g46984	Non-protein coding transcript.			99.7511	214.876	2.15412	1.1071	0.00137416	0.0143357
LOC_Os09g14820				91.8724	214.812	2.33816	1.22537	3.24483e-05	0.000639299
LOC_Os06g12310	Aquaporin NIP III subfamily protein, Aquaporin, Silicon influx transporter, Water transport	NIP4;2	NOD26-like intrinsic protein 4;2 \\ NOD26-like intrinsic protein 4;2 (NIP4;2); FUNCTIONS IN: water channel activity; INVOLVED IN: transport, transmembrane transport; LOCATED IN: integral to membrane, membrane; EXPRESSED IN: root, flower, cultured cell, leaf; CONTAINS InterPro DOMAIN/s: Major intrinsic protein, conserved site (InterPro:IPR022357), Aquaporin (InterPro:IPR012269), Major intrinsic pr…	91.2649	205.27	2.24917	1.16939	3.9686e-08	1.66959e-06
LOC_Os08g32350	Conserved hypothetical protein.			94.7702	192.291	2.02902	1.02078	4.7296e-11	3.36685e-09
LOC_Os06g23350	Seed maturation protein domain containing protein.	AT3G22490	Seed maturation protein \\ Seed maturation protein; CONTAINS InterPro DOMAIN/s: Seed maturation protein (InterPro:IPR007011); BEST Arabidopsis thaliana protein match is: Seed maturation protein (TAIR:AT3G22500.1); Has 198 Blast hits to 183 proteins in 40 species: Archae - 2; Bacteria - 41; Metazoa - 7; Fungi - 0; Plants - 144; Viruses - 3; Other Eukaryotes - 1 (source: NCBI BLink).	77.4193	188.628	2.43644	1.28478	2.05633e-06	5.69354e-05
LOC_Os04g53930	Similar to H0105C05.5 protein.	2015-10-04	organic cation/carnitine transporter4 \\ organic cation/carnitine transporter4 (4-Oct); FUNCTIONS IN: carbohydrate transmembrane transporter activity, sugar:hydrogen symporter activity; INVOLVED IN: transport, transmembrane transport; LOCATED IN: chloroplast thylakoid membrane, membrane; EXPRESSED IN: 13 plant structures; EXPRESSED DURING: 6 growth stages; CONTAINS InterPro DOMAIN/s: Sugar transp…	67.8187	180.504	2.66157	1.41228	3.39609e-14	3.78056e-12
LOC_Os05g03900	DNA-binding WRKY domain containing protein.	WRKY65	WRKY DNA-binding protein 65 \\ member of WRKY Transcription Factor; Group II-e \\ WRKY DNA-binding protein 65 (WRKY65); FUNCTIONS IN: sequence-specific DNA binding transcription factor activity; INVOLVED IN: regulation of transcription, DNA-dependent, regulation of transcription; EXPRESSED IN: 8 plant structures; EXPRESSED DURING: LP.06 six leaves visible, LP.04 four leaves visible, 4 anthesis; C…	81.2852	177.636	2.18534	1.12785	3.75279e-12	3.09502e-10
LOC_Os01g18490	Conserved hypothetical protein.			85.631	171.729	2.00545	1.00393	9.48744e-09	4.57477e-07
LOC_Os03g01436				80.0294	162.463	2.03004	1.02151	1.51121e-09	8.42881e-08
LOC_Os04g52110	Similar to Cor14b protein precursor.	AT4G21020	Late embryogenesis abundant protein (LEA) family protein \\ Late embryogenesis abundant protein (LEA) family protein; BEST Arabidopsis thaliana protein match is: Late embryogenesis abundant protein (LEA) family protein (TAIR:AT5G44310.2); Has 25029 Blast hits to 12516 proteins in 1815 species: Archae - 109; Bacteria - 7990; Metazoa - 4935; Fungi - 1662; Plants - 2602; Viruses - 153; Other Eukaryo…	60.3315	138.547	2.29642	1.19939	1.27363e-10	8.57039e-09
LOC_Os03g15910	Protein of unknown function DUF2253, membrane domain containing protein.	AT3G09085	Protein of unknown function (DUF962) \\ Protein of unknown function (DUF962); CONTAINS InterPro DOMAIN/s: Protein of unknown function DUF962 (InterPro:IPR009305); Has 704 Blast hits to 704 proteins in 265 species: Archae - 0; Bacteria - 429; Metazoa - 0; Fungi - 2; Plants - 37; Viruses - 0; Other Eukaryotes - 236 (source: NCBI BLink).	54.6666	131.757	2.41019	1.26914	1.61524e-08	7.41833e-07
LOC_Os12g09700	Similar to Jasmonate-induced protein.	AT1G73040	Mannose-binding lectin superfamily protein \\ Mannose-binding lectin superfamily protein; CONTAINS InterPro DOMAIN/s: Mannose-binding lectin (InterPro:IPR001229); BEST Arabidopsis thaliana protein match is: Mannose-binding lectin superfamily protein (TAIR:AT1G19715.2); Has 1381 Blast hits to 855 proteins in 48 species: Archae - 0; Bacteria - 13; Metazoa - 1; Fungi - 0; Plants - 1366; Viruses - 0;…	45.1107	114.925	2.54763	1.34915	0.000687662	0.00820553
LOC_Os10g01820	Conserved hypothetical protein.			51.3466	113.379	2.20812	1.14282	0.00033613	0.0045969
LOC_Os06g10130	Conserved hypothetical protein.			42.1591	111.687	2.64917	1.40554	2.41123e-11	1.80183e-09
LOC_Os11g31450	Protein kinase-like domain containing protein.			50.4088	102.949	2.04229	1.03019	5.72523e-07	1.85699e-05
LOC_Os03g01614	Conserved hypothetical protein.			38.5535	102.465	2.65773	1.4102	0.00192534	0.0185942
LOC_Os08g09570	Conserved hypothetical protein.	AT5G45540	Protein of unknown function (DUF594) \\ Protein of unknown function (DUF594); CONTAINS InterPro DOMAIN/s: Protein of unknown function DUF594 (InterPro:IPR007658); BEST Arabidopsis thaliana protein match is: Protein of unknown function (DUF594) (TAIR:AT5G45480.1); Has 1285 Blast hits to 857 proteins in 12 species: Archae - 0; Bacteria - 0; Metazoa - 0; Fungi - 0; Plants - 1285; Viruses - 0; Other …	26.0075	102.317	3.93415	1.97605	0.00600545	0.0453772
LOC_Os02g47200	Homodimeric diiron-carboxylate protein, Cyanide-resistant respiration in mitochondria, Reactive oxygen species (ROS) scavenging	AOX1A	alternative oxidase 1A \\ Encodes AOX1a, an isoform of alternative oxidase that is expressed in rosettes, flowers, and root. The alternative oxidase of plant mitochondria transfers electrons from the ubiquinone pool to oxygen without energy conservations. It is regulated through transcriptional control and by pyruvate. Plays a role in shoot acclimation to low temperature. Also is capable of ameli…	49.754	101.966	2.0494	1.0352	4.8645e-07	1.60671e-05
LOC_Os01g49160	Homeodomain-like domain containing protein.	MYB36	myb domain protein 36 \\ Encodes a putative transcription factor (MYB36). \\ myb domain protein 36 (MYB36); CONTAINS InterPro DOMAIN/s: SANT, DNA-binding (InterPro:IPR001005), Homeodomain-like (InterPro:IPR009057), Myb, DNA-binding (InterPro:IPR014778), HTH transcriptional regulator, Myb-type, DNA-binding (InterPro:IPR017930), Homeodomain-related (InterPro:IPR012287), Myb transcription factor (In…	36.199	98.715	2.72701	1.44732	1.50158e-11	1.15724e-09
LOC_Os02g45225	Hypothetical conserved gene.			46.1077	98.0365	2.12625	1.08831	9.16604e-05	0.0015372
LOC_Os02g53510	Conserved hypothetical protein.			46.7566	97.9271	2.0944	1.06654	4.60332e-07	1.53167e-05
LOC_Os04g43390	Similar to Beta-glucosidase.	BGLU47	beta-glucosidase 47 \\ beta-glucosidase 47 (BGLU47); FUNCTIONS IN: cation binding, hydrolase activity, hydrolyzing O-glycosyl compounds, catalytic activity; INVOLVED IN: carbohydrate metabolic process; LOCATED IN: endomembrane system; EXPRESSED IN: 19 plant structures; EXPRESSED DURING: 13 growth stages; CONTAINS InterPro DOMAIN/s: Glycoside hydrolase, family 1 (InterPro:IPR001360), Glycoside hyd…	44.7844	93.2555	2.08232	1.05819	4.10857e-07	1.391e-05
LOC_Os04g33720	Similar to Cell wall invertase (EC 3.2.1.26).	CWINV2	cell wall invertase 2 \\ cell wall invertase 2 (CWINV2); FUNCTIONS IN: hydrolase activity, hydrolyzing O-glycosyl compounds; INVOLVED IN: sucrose catabolic process, using beta-fructofuranosidase, carbohydrate metabolic process; LOCATED IN: endomembrane system; EXPRESSED IN: 9 plant structures; EXPRESSED DURING: L mature pollen stage, M germinated pollen stage, 4 anthesis, C globular stage, petal …	38.5373	90.9231	2.35935	1.23839	9.23189e-09	4.47548e-07
LOC_Os05g12450	UDP-glucuronosyl/UDP-glucosyltransferase family protein.	GT72B1	UDP-Glycosyltransferase superfamily protein \\ the glycosyltransferase (UGT72B1) is involved in metabolizing xenobiotica (chloroaniline and chlorophenole). Comparison between wild type and knock-out mutant demonstrates the central role of this gene for metabolizing chloroaniline but significantly less for chlorophenole. The glucosyltransferase preferred UDP-xylose over UDP-glucose indicating its …	33.6455	87.8401	2.61075	1.38447	1.13581e-06	3.41007e-05
LOC_Os01g45914	Hypothetical conserved gene.			26.3277	80.529	3.05871	1.61292	4.13235e-08	1.7304e-06
LOC_Os06g44100		HLS1	Acyl-CoA N-acyltransferases (NAT) superfamily protein \\ involved in apical hook development. putative N-acetyltransferase \\ HOOKLESS 1 (HLS1); CONTAINS InterPro DOMAIN/s: GCN5-related N-acetyltransferase, C-terminal (InterPro:IPR022610), GCN5-related N-acetyltransferase (InterPro:IPR000182), Acyl-CoA N-acyltransferase (InterPro:IPR016181); BEST Arabidopsis thaliana protein match is: Acyl-CoA N-…	13.8462	80.213	5.79314	2.53434	6.00619e-05	0.00108027
LOC_Os08g34500	Hypothetical conserved gene.			37.8447	80.1901	2.11893	1.08333	3.75164e-06	9.65611e-05
LOC_Os02g33380	Pectinesterase inhibitor domain containing protein.			35.5711	78.4431	2.20525	1.14094	1.14267e-06	3.42308e-05
LOC_Os04g45810	Similar to Homeobox-leucine zipper protein HOX22.	HB-7	homeobox 7 \\ encodes a putative transcription factor that contains a homeodomain closely linked to a leucine zipper motif. Transcript is detected in all tissues examined. Is transcriptionally regulated in an ABA-dependent manner and may act in a signal transduction pathway which mediates a drought response. \\ homeobox 7 (HB-7); FUNCTIONS IN: transcription activator activity, sequence-specific D…	30.9252	77.6553	2.51107	1.3283	0.00352758	0.0301404
LOC_Os03g63310	Similar to Cytochrome P450.	CYP71B37	cytochrome P450, family 71, subfamily B, polypeptide 37 \\ putative cytochrome P450 \\ cytochrome P450, family 71, subfamily B, polypeptide 37 (CYP71B37); FUNCTIONS IN: electron carrier activity, monooxygenase activity, iron ion binding, oxygen binding, heme binding; INVOLVED IN: oxidation reduction; EXPRESSED IN: 11 plant structures; EXPRESSED DURING: 4 anthesis, F mature embryo stage, petal dif…	25.3351	76.7283	3.02854	1.59862	0.000129053	0.00205596
LOC_Os06g48500	Similar to cDNA clone:J023083M02, full insert sequence.			21.041	76.6692	3.64379	1.86544	0.00171969	0.0170525
LOC_Os02g07110	Hypothetical gene.	AT1G56150	SAUR-like auxin-responsive protein family \\ SAUR-like auxin-responsive protein family ; CONTAINS InterPro DOMAIN/s: Auxin responsive SAUR protein (InterPro:IPR003676); BEST Arabidopsis thaliana protein match is: SAUR-like auxin-responsive protein family (TAIR:AT3G12830.1); Has 1156 Blast hits to 1154 proteins in 26 species: Archae - 0; Bacteria - 0; Metazoa - 0; Fungi - 0; Plants - 1155; Viruses…	28.9535	72.1842	2.49311	1.31795	4.38913e-05	0.000833112
LOC_Os04g48460	Similar to cDNA clone:001-036-C03, full insert sequence.	CYP704A2	cytochrome P450, family 704, subfamily A, polypeptide 2 \\ member of CYP704A \\ cytochrome P450, family 704, subfamily A, polypeptide 2 (CYP704A2); FUNCTIONS IN: electron carrier activity, monooxygenase activity, iron ion binding, oxygen binding, heme binding; INVOLVED IN: oxidation reduction; LOCATED IN: endoplasmic reticulum; EXPRESSED IN: callus; CONTAINS InterPro DOMAIN/s: Cytochrome P450 (In…	17.7576	70.333	3.96072	1.98576	0.000106989	0.00174558
LOC_Os06g42660	Similar to P10Sh249C12.			15.4795	70.0697	4.5266	2.17843	8.35214e-07	2.5821e-05
LOC_Os08g29020	Conserved hypothetical protein.	WAK2	wall-associated kinase 2 \\ cytoplasmic serine/threonine protein kinase induced by salicylic acid. mutant plants exhibit a loss of cell expansion and dependence on sugars and salts for seedling growth, affecting the expression and activity of vacuolar invertase. \\ wall-associated kinase 2 (WAK2); FUNCTIONS IN: protein serine/threonine kinase activity, protein kinase activity, calcium ion binding…	33.5844	70.0079	2.08454	1.05973	0.00127486	0.013524
LOC_Os02g42430	GRAM domain containing protein.	AT5G08350	GRAM domain-containing protein / ABA-responsive protein-related \\ GRAM domain-containing protein / ABA-responsive protein-related; CONTAINS InterPro DOMAIN/s: GRAM (InterPro:IPR004182); BEST Arabidopsis thaliana protein match is: GRAM domain-containing protein / ABA-responsive protein-related (TAIR:AT5G23370.1); Has 358 Blast hits to 358 proteins in 24 species: Archae - 0; Bacteria - 0; Metazoa …	31.28	69.0148	2.20635	1.14166	0.000190328	0.00285555
LOC_Os06g34020	Similar to predicted protein.	AT4G18340	Glycosyl hydrolase superfamily protein \\ Glycosyl hydrolase superfamily protein; FUNCTIONS IN: cation binding, hydrolase activity, hydrolyzing O-glycosyl compounds, catalytic activity; INVOLVED IN: carbohydrate metabolic process; LOCATED IN: endomembrane system; EXPRESSED IN: 21 plant structures; EXPRESSED DURING: 13 growth stages; CONTAINS InterPro DOMAIN/s: Glycoside hydrolase, catalytic core …	28.6117	67.1346	2.3464	1.23045	1.56525e-06	4.49964e-05
LOC_Os02g36020		AT5G29646	transposable element gene \\ CACTA-like transposase family (Tnp2/En/Spm), has a 1.9e-233 P-value blast match to gb|AAG52024.1|AC022456_5 Tam1-homologous transposon protein TNP2, putative; 12762-16371 (Arabidopsis thaliana) (CACTA-element)	32.304	66.6951	2.06461	1.04587	1.34376e-05	0.000298687
LOC_Os01g27210	Similar to Glutathione S-transferase GST 8 (EC 2.5.1.18).	ATGSTF13	Glutathione S-transferase family protein \\ Encodes glutathione transferase belonging to the phi class of GSTs. Naming convention according to Wagner et al. (2002). \\ ATGSTF13; CONTAINS InterPro DOMAIN/s: Thioredoxin fold (InterPro:IPR012335), Glutathione S-transferase, C-terminal (InterPro:IPR004046), Glutathione S-transferase, C-terminal-like (InterPro:IPR010987), Glutathione S-transferase/chl…	28.6416	66.3755	2.31745	1.21254	8.36303e-05	0.00142641
LOC_Os02g53160	Protein-tyrosine phosphatase, SIW14-like domain containing protein.	AT1G05000	Phosphotyrosine protein phosphatases superfamily protein \\ Phosphotyrosine protein phosphatases superfamily protein; FUNCTIONS IN: phosphatase activity, protein tyrosine phosphatase activity, phosphoprotein phosphatase activity; INVOLVED IN: dephosphorylation; LOCATED IN: cellular_component unknown; EXPRESSED IN: 12 plant structures; EXPRESSED DURING: 8 growth stages; CONTAINS InterPro DOMAIN/s:…	32.5906	65.4482	2.00819	1.0059	0.000465517	0.0060281
LOC_Os02g03310	K Homology domain containing protein.	PEP	RNA-binding KH domain-containing protein \\ Encodes a novel Arabidopsis gene encoding a polypeptide with K-homology (KH) RNA-binding modules, which acts on vegetative growth and pistil development. Genetic studies suggest that PEP interacts with element(s) of the CLAVATA signaling pathway. \\ PEPPER (PEP); FUNCTIONS IN: RNA binding, nucleic acid binding; INVOLVED IN: shoot development, gynoecium …	30.9656	64.1559	2.07185	1.05092	6.94966e-05	0.00122953
LOC_Os09g08570	Conserved hypothetical protein.			23.3767	62.5272	2.67476	1.41941	0.000300002	0.00418533
LOC_Os04g44230		CKX6	cytokinin oxidase/dehydrogenase 6 \\ This gene used to be called AtCKX7. It encodes a protein whose sequence is similar to cytokinin oxidase/dehydrogenase, which catalyzes the degradation of cytokinins. \\ cytokinin oxidase/dehydrogenase 6 (CKX6); CONTAINS InterPro DOMAIN/s: Cytokinin dehydrogenase 1, FAD/cytokinin binding domain (InterPro:IPR015345), FAD-binding, type 2 (InterPro:IPR016166), FAD…	26.6802	62.4065	2.33905	1.22592	2.37737e-06	6.4439e-05
LOC_Os02g36940	Similar to Fw2.2.	PCR2	PLANT CADMIUM RESISTANCE 2 \\ PLANT CADMIUM RESISTANCE 2 (PCR2); FUNCTIONS IN: molecular_function unknown; INVOLVED IN: response to oxidative stress; LOCATED IN: plasma membrane; EXPRESSED IN: callus; CONTAINS InterPro DOMAIN/s: Protein of unknown function Cys-rich (InterPro:IPR006461); BEST Arabidopsis thaliana protein match is: PLAC8 family protein (TAIR:AT5G35525.1); Has 803 Blast hits to 802 …	27.9919	56.6494	2.02378	1.01705	0.000231986	0.00337571
LOC_Os08g38930		AT2G06470	transposable element gene \\ gypsy-like retrotransposon family, has a 0. P-value blast match to GB:AAD27547 polyprotein (Gypsy_Ty3-element) (Oryza sativa subsp. indica)	27.3092	55.6988	2.03956	1.02826	0.000134097	0.00212008
LOC_Os06g39250	Conserved hypothetical protein.	AT1G42110	transposable element gene \\ hAT-like transposase family (hobo/Ac/Tam3), has a 3.5e-136 P-value blast match to GB:AAD24567 transposase Tag2 (hAT-element) (Arabidopsis thaliana)	25.3568	53.4883	2.10942	1.07685	0.00566518	0.0433387
LOC_Os02g56500	Conserved hypothetical protein.	AT5G28910	unknown protein; FUNCTIONS IN: molecular_function unknown; INVOLVED IN: biological_process unknown; LOCATED IN: mitochondrion; BEST Arabidopsis thaliana protein match is: unknown protein (TAIR:AT5G28960.1); Has 35333 Blast hits to 34131 proteins in 2444 species: Archae - 798; Bacteria - 22429; Metazoa - 974; Fungi - 991; Plants - 531; Viruses - 0; Other Eukaryotes - 9610 (source: NCBI BLink).	22.0413	52.7036	2.39113	1.25769	1.4947e-05	0.000327129
LOC_Os08g35160	Similar to Chaperone protein dnaJ.	AT3G14200	Chaperone DnaJ-domain superfamily protein \\ Chaperone DnaJ-domain superfamily protein; FUNCTIONS IN: heat shock protein binding; INVOLVED IN: protein folding; LOCATED IN: cellular_component unknown; EXPRESSED IN: 19 plant structures; EXPRESSED DURING: 11 growth stages; CONTAINS InterPro DOMAIN/s: Molecular chaperone, heat shock protein, Hsp40, DnaJ (InterPro:IPR015609), Heat shock protein DnaJ, …	23.346	50.0486	2.14378	1.10016	0.000482557	0.00619832
LOC_Os08g34670				21.3801	49.9559	2.33656	1.22439	4.87109e-05	0.000908298
LOC_Os10g21784				23.0304	48.0048	2.08441	1.05964	0.000317448	0.00438127
LOC_Os03g59460	Similar to Transcription factor EmBP-1 (Fragment).	GBF1	G-box binding factor 1 \\ member of a gene family encoding basic leucine zipper proteins (GBFs) which bind the G-box \\ G-box binding factor 1 (GBF1); CONTAINS InterPro DOMAIN/s: Basic-leucine zipper (bZIP) transcription factor (InterPro:IPR004827), G-box binding, MFMR (InterPro:IPR012900), bZIP transcription factor, bZIP-1 (InterPro:IPR011616); BEST Arabidopsis thaliana protein match is: basic r…	14.8085	45.644	3.08229	1.624	8.70891e-07	2.68015e-05
LOC_Os02g13800	Similar to Heat shock transcription factor 29 (Fragment).	HSFC1	heat shock transcription factor C1 \\ member of Heat Stress Transcription Factor (Hsf) family \\ heat shock transcription factor C1 (HSFC1); FUNCTIONS IN: DNA binding, sequence-specific DNA binding transcription factor activity; INVOLVED IN: regulation of transcription, DNA-dependent; LOCATED IN: nucleus; EXPRESSED IN: 14 plant structures; EXPRESSED DURING: LP.06 six leaves visible, LP.04 four le…	21.4127	45.6129	2.13018	1.09098	0.000177047	0.00268157
LOC_Os08g41720	Similar to Auxin efflux carrier component 1 (PIN-FORMED protein) (AtPIN1).	PIN5	Auxin efflux carrier family protein \\ Encodes PIN5, an atypical member of the PIN family. PIN5 is a functional auxin transporter that is required for auxin-mediated development. PIN5 does not have a direct role in cell-to-cell transport but regulates intracellular auxin homeostasis and metabolism. PIN5 localizes, unlike other characterized plasma membrane PIN proteins, to endoplasmic reticulum (…	7.5735	42.5008	5.61178	2.48846	0.000385343	0.0051527
LOC_Os12g16290	Similar to cDNA clone:J013002B21, full insert sequence.	PRR1	pinoresinol reductase 1 \\ Encodes a pinoresinol reductase involved in lignan biosynthesis. Expressed strongly in roots and less strongly in stems. Shows specificity for pinoresinol and not lariciresinol. \\ pinoresinol reductase 1 (PRR1); CONTAINS InterPro DOMAIN/s: NAD(P)-binding domain (InterPro:IPR016040), NmrA-like (InterPro:IPR008030); BEST Arabidopsis thaliana protein match is: pinoresinol…	19.7522	39.9746	2.02381	1.01707	0.00277484	0.0247975
LOC_Os07g19274				18.4386	38.5678	2.09169	1.06467	0.00178455	0.0175605
LOC_Os01g46280	Cytochrome P450 domain containing protein.	ATCG00350.1	Photosystem I, PsaA/PsaB protein \\ Encodes psaA protein comprising the reaction center for photosystem I along with psaB protein; hydrophobic protein encoded by the chloroplast genome. \\ PSAA; FUNCTIONS IN: chlorophyll binding; INVOLVED IN: photosynthesis; LOCATED IN: in 6 components; EXPRESSED IN: 24 plant structures; EXPRESSED DURING: 13 growth stages; CONTAINS InterPro DOMAIN/s: Photosystem …	17.8136	37.9229	2.12888	1.09009	0.0006565	0.00788587
LOC_Os04g43170	Similar to Embryo-specific protein 1 (ATS1).	ATS1	seed gene 1 \\ Encodes caleosin, a 27-kDa protein found within seed lipid bodies. Gene is expressed preferentially in the embryo, has similarity to a rice ABA-responsive gene, EFA27. Catalyze hydroperoxide-dependent mono-oxygenation reactions. Require calcium for peroxygenase activity. Probably deeply buried in lipid droplets or microsomes. \\ seed gene 1 (ATS1); FUNCTIONS IN: heme oxygenase (dec…	16.807	37.5992	2.23711	1.16164	0.000410899	0.00544065
LOC_Os06g18740				16.7901	37.5542	2.23668	1.16136	0.000744028	0.00877363
LOC_Os09g27550	Conserved hypothetical protein.			18.1084	36.9199	2.03883	1.02774	0.00246721	0.0226239
LOC_Os12g40080	Transcriptional factor B3 domain containing protein.	AT4G33280	AP2/B3-like transcriptional factor family protein \\ AP2/B3-like transcriptional factor family protein; FUNCTIONS IN: DNA binding, sequence-specific DNA binding transcription factor activity; INVOLVED IN: regulation of transcription, DNA-dependent; LOCATED IN: vacuole; CONTAINS InterPro DOMAIN/s: Transcriptional factor B3 (InterPro:IPR003340); BEST Arabidopsis thaliana protein match is: AP2/B3-li…	14.7992	36.6052	2.47345	1.30652	0.000213202	0.00314638
LOC_Os04g44150	2OG-Fe(II) oxygenase domain containing protein.	GA2OX8	gibberellin 2-oxidase 8 \\ Encodes a protein with gibberellin 2-oxidase activity which acts specifically on C-20 gibberellins. \\ gibberellin 2-oxidase 8 (GA2OX8); CONTAINS InterPro DOMAIN/s: Oxoglutarate/iron-dependent oxygenase (InterPro:IPR005123); BEST Arabidopsis thaliana protein match is: gibberellin 2-oxidase 7 (TAIR:AT1G50960.1); Has 8586 Blast hits to 8547 proteins in 1007 species: Archa…	16.1523	36.2944	2.24701	1.168	0.000319989	0.00440959
LOC_Os08g09890	Conserved hypothetical protein.			17.4472	34.9316	2.00214	1.00154	0.00482826	0.0384371
LOC_Os02g02400	Catalase isozyme A (EC 1.11.1.6) (CAT-A).	CAT2	catalase 2 \\ Encodes a peroxisomal catalase, highly expressed in bolts and leaves. mRNA expression patterns show circadian regulation with mRNA levels being high in the subjective early morning. Loss of function mutations have increased H2O2 levels and increased H2O2 sensitivity. Mutants accumulate more toxic ions yet show decreased sensitivity to Li+. This decreased sensitivity is most likely d…	9.23298	33.1447	3.58982	1.84391	0.00199172	0.0191043
LOC_Os05g39170	Domain of unknown function DUF1618 domain containing protein.			10.2074	32.2637	3.16081	1.66029	5.31783e-05	0.000970011
LOC_Os11g45680				14.8167	32.1787	2.17179	1.11889	0.00209087	0.0198596
LOC_Os07g49200	Uncharacterised protein family UPF0497, trans-membrane plant domain containing protein.	AT2G38480	Uncharacterised protein family (UPF0497) \\ Uncharacterised protein family (UPF0497); FUNCTIONS IN: molecular_function unknown; INVOLVED IN: biological_process unknown; LOCATED IN: plasma membrane, membrane; EXPRESSED IN: 24 plant structures; EXPRESSED DURING: 13 growth stages; CONTAINS InterPro DOMAIN/s: Uncharacterised protein family UPF0497, trans-membrane plant (InterPro:IPR006702); BEST Arab…	12.1786	31.2322	2.56452	1.35869	0.000380159	0.0050985
LOC_Os10g39980	Divalent ion symporter domain containing protein.	AT1G02260	Divalent ion symporter \\ Divalent ion symporter; FUNCTIONS IN: citrate transmembrane transporter activity, transporter activity; INVOLVED IN: citrate transport, transmembrane transport; LOCATED IN: endomembrane system, integral to membrane; EXPRESSED IN: 24 plant structures; EXPRESSED DURING: 13 growth stages; CONTAINS InterPro DOMAIN/s: Divalent ion symporter (InterPro:IPR004680); Has 9789 Blas…	13.505	31.1679	2.30788	1.20657	0.00296103	0.0261419
LOC_Os11g24950				15.1477	30.8481	2.03649	1.02608	0.00628602	0.0468821
LOC_Os11g36940	Similar to Glucan endo-1,3-beta-glucosidase 5.	AT1G64760	O-Glycosyl hydrolases family 17 protein \\ O-Glycosyl hydrolases family 17 protein; FUNCTIONS IN: cation binding, hydrolase activity, hydrolyzing O-glycosyl compounds, catalytic activity; INVOLVED IN: carbohydrate metabolic process; LOCATED IN: anchored to plasma membrane, plasma membrane, anchored to membrane; EXPRESSED IN: guard cell, cultured cell; CONTAINS InterPro DOMAIN/s: X8 (InterPro:IPR0…	6.59841	30.8351	4.67311	2.22438	3.95095e-06	0.000100365
LOC_Os01g34374	Cytochrome P450 domain containing protein.	ATCG00350.1	Photosystem I, PsaA/PsaB protein \\ Encodes psaA protein comprising the reaction center for photosystem I along with psaB protein; hydrophobic protein encoded by the chloroplast genome. \\ PSAA; FUNCTIONS IN: chlorophyll binding; INVOLVED IN: photosynthesis; LOCATED IN: in 6 components; EXPRESSED IN: 24 plant structures; EXPRESSED DURING: 13 growth stages; CONTAINS InterPro DOMAIN/s: Photosystem …	13.8236	30.5206	2.20786	1.14265	0.00400923	0.0331369
LOC_Os07g25260				14.5033	30.514	2.10393	1.07309	0.00585597	0.0444869
LOC_Os08g30540				13.1689	30.513	2.31705	1.21229	0.00117244	0.0126862
LOC_Os11g24760				11.5251	30.1635	2.61721	1.38803	0.00413712	0.0339852
LOC_Os06g27880		AT3G32899	transposable element gene \\ gypsy-like retrotransposon family, has a 7.0e-240 P-value blast match to GB:AAD19359 polyprotein (gypsy_Ty3-element) (Sorghum bicolor)	12.1868	29.8358	2.4482	1.29172	0.00120225	0.0129415
LOC_Os06g34400	Hypothetical conserved gene.	AT2G35000	RING/U-box superfamily protein \\ E3 ligase-like protein induced by chitin oligomers. \\ RING/U-box superfamily protein; FUNCTIONS IN: ubiquitin-protein ligase activity, zinc ion binding; INVOLVED IN: defense response to fungus, response to chitin; LOCATED IN: endomembrane system; EXPRESSED IN: sperm cell, hypocotyl, root, stamen; EXPRESSED DURING: 4 anthesis, petal differentiation and expansion …	5.91104	29.7715	5.03658	2.33245	0.00161045	0.0161963
LOC_Os04g25470		AT4G06604	transposable element gene \\ gypsy-like retrotransposon family, has a 1.4e-248 P-value blast match to GB:AAD19359 polyprotein (gypsy_Ty3-element) (Sorghum bicolor)	13.1799	29.1678	2.21305	1.14603	0.003924	0.0326409
LOC_Os05g44300	Protein of unknown function DUF506, plant family protein.	AT4G32480	Protein of unknown function (DUF506) \\ Protein of unknown function (DUF506) ; FUNCTIONS IN: molecular_function unknown; INVOLVED IN: biological_process unknown; LOCATED IN: cellular_component unknown; EXPRESSED IN: cultured cell; CONTAINS InterPro DOMAIN/s: Protein of unknown function DUF506, plant (InterPro:IPR006502); BEST Arabidopsis thaliana protein match is: Protein of unknown function (DUF…	13.488	29.1358	2.16013	1.11112	0.00366441	0.0310642
LOC_Os01g10380	Cytochrome P450 domain containing protein.	ATCG00350.1	Photosystem I, PsaA/PsaB protein \\ Encodes psaA protein comprising the reaction center for photosystem I along with psaB protein; hydrophobic protein encoded by the chloroplast genome. \\ PSAA; FUNCTIONS IN: chlorophyll binding; INVOLVED IN: photosynthesis; LOCATED IN: in 6 components; EXPRESSED IN: 24 plant structures; EXPRESSED DURING: 13 growth stages; CONTAINS InterPro DOMAIN/s: Photosystem …	7.57637	28.8533	3.80833	1.92916	9.15054e-06	0.000213022
LOC_Os11g48000	Similar to Transcriptional regulator SUPERMAN.	ZFP10	zinc-finger protein 10 \\ zinc-finger protein 10 (ZFP10); FUNCTIONS IN: sequence-specific DNA binding transcription factor activity, zinc ion binding, nucleic acid binding; INVOLVED IN: regulation of transcription; LOCATED IN: intracellular; EXPRESSED IN: root; CONTAINS InterPro DOMAIN/s: Zinc finger, C2H2-like (InterPro:IPR015880), Zinc finger, C2H2-type (InterPro:IPR007087); BEST Arabidopsis th…	10.8786	28.1814	2.59055	1.37326	0.000947664	0.0106769
LOC_Os03g21419	Similar to Cytochrome P450 CYP714B3.	AT4G03810	transposable element gene \\ copia-like retrotransposon family, has a 0. P-value blast match to GB:BAA22288 pol polyprotein (Ty1_Copia-element) (Oryza australiensis)GB:BAA22288 polyprotein (Ty1_Copia-element) (Oryza australiensis)gi|2443320|dbj|BAA22288.1| polyprotein (RIRE1) (Oryza australiensis) (Ty1_Copia-element)	12.8403	28.17	2.19387	1.13348	0.00496897	0.0392613
LOC_Os01g18230	Cytochrome P450 domain containing protein.	ATCG00350.1	Photosystem I, PsaA/PsaB protein \\ Encodes psaA protein comprising the reaction center for photosystem I along with psaB protein; hydrophobic protein encoded by the chloroplast genome. \\ PSAA; FUNCTIONS IN: chlorophyll binding; INVOLVED IN: photosynthesis; LOCATED IN: in 6 components; EXPRESSED IN: 24 plant structures; EXPRESSED DURING: 13 growth stages; CONTAINS InterPro DOMAIN/s: Photosystem …	11.1807	27.8888	2.49436	1.31867	0.00113911	0.0123778
LOC_Os01g43590	Similar to Heat shock transcription factor 31 (Fragment).	HSFC1	heat shock transcription factor C1 \\ member of Heat Stress Transcription Factor (Hsf) family \\ heat shock transcription factor C1 (HSFC1); FUNCTIONS IN: DNA binding, sequence-specific DNA binding transcription factor activity; INVOLVED IN: regulation of transcription, DNA-dependent; LOCATED IN: nucleus; EXPRESSED IN: 14 plant structures; EXPRESSED DURING: LP.06 six leaves visible, LP.04 four le…	5.27963	27.859	5.27669	2.39963	6.76029e-07	2.15144e-05
LOC_Os01g37880	Cytochrome P450 domain containing protein.	ATCG00350.1	Photosystem I, PsaA/PsaB protein \\ Encodes psaA protein comprising the reaction center for photosystem I along with psaB protein; hydrophobic protein encoded by the chloroplast genome. \\ PSAA; FUNCTIONS IN: chlorophyll binding; INVOLVED IN: photosynthesis; LOCATED IN: in 6 components; EXPRESSED IN: 24 plant structures; EXPRESSED DURING: 13 growth stages; CONTAINS InterPro DOMAIN/s: Photosystem …	11.1994	27.1527	2.42448	1.27768	0.00231468	0.021517
LOC_Os01g36780	Cytochrome P450 domain containing protein.	ATCG00350.1	Photosystem I, PsaA/PsaB protein \\ Encodes psaA protein comprising the reaction center for photosystem I along with psaB protein; hydrophobic protein encoded by the chloroplast genome. \\ PSAA; FUNCTIONS IN: chlorophyll binding; INVOLVED IN: photosynthesis; LOCATED IN: in 6 components; EXPRESSED IN: 24 plant structures; EXPRESSED DURING: 13 growth stages; CONTAINS InterPro DOMAIN/s: Photosystem …	9.87664	26.8419	2.71772	1.4424	0.000491593	0.00627099
LOC_Os04g42889				10.553	26.5079	2.51189	1.32877	0.00213776	0.0202055
LOC_Os01g65169	TGF-beta receptor, type I/II extracellular region family protein.	AT1G22540	Major facilitator superfamily protein \\ Major facilitator superfamily protein; FUNCTIONS IN: transporter activity; INVOLVED IN: oligopeptide transport; LOCATED IN: membrane; EXPRESSED IN: 22 plant structures; EXPRESSED DURING: 13 growth stages; CONTAINS InterPro DOMAIN/s: PTR2 family proton/oligopeptide symporter, conserved site (InterPro:IPR018456), Oligopeptide transporter (InterPro:IPR000109)…	9.87256	26.1764	2.65143	1.40677	0.00105908	0.0116792
LOC_Os04g33710	Similar to OSIGBa0134P10.7 protein.			10.5365	26.1236	2.47933	1.30995	0.00134138	0.0141024
LOC_Os09g26330		AT5G57500	Galactosyltransferase family protein \\ Galactosyltransferase family protein; FUNCTIONS IN: transferase activity, transferring glycosyl groups; INVOLVED IN: protein amino acid glycosylation; LOCATED IN: endomembrane system, membrane; EXPRESSED IN: 17 plant structures; EXPRESSED DURING: 10 growth stages; CONTAINS InterPro DOMAIN/s: Glycosyl transferase, family 31 (InterPro:IPR002659); BEST Arabido…	9.89353	25.8438	2.6122	1.38526	0.000979962	0.0109405
LOC_Os06g04930	Similar to Early nodulin.			3.29512	25.8166	7.83481	2.9699	6.94961e-08	2.76869e-06
LOC_Os05g40020	Zinc finger, RING/FYVE/PHD-type domain containing protein.	AT3G10910	RING/U-box superfamily protein \\ RING/U-box superfamily protein; FUNCTIONS IN: zinc ion binding; CONTAINS InterPro DOMAIN/s: Zinc finger, RING-type (InterPro:IPR001841), Zinc finger, C3HC4 RING-type (InterPro:IPR018957); BEST Arabidopsis thaliana protein match is: RING/U-box superfamily protein (TAIR:AT5G05280.1); Has 8963 Blast hits to 8935 proteins in 281 species: Archae - 0; Bacteria - 6; Met…	3.6143	25.4762	7.04872	2.81736	5.55733e-07	1.80904e-05
LOC_Os03g24280				11.1919	25.1321	2.24556	1.16708	0.00492618	0.0390557
LOC_Os01g37050	Ribonuclease III domain containing protein.	RTL2	RNAse THREE-like protein 2 \\ double-stranded RNA binding / ribonuclease III. Required for 3' external transcribed spacer (ETS) cleavage of the pre-rRNA in vivo. Localizes in the nucleus and cytoplasm. \\ RNAse THREE-like protein 2 (RTL2); FUNCTIONS IN: double-stranded RNA binding, ribonuclease III activity; INVOLVED IN: RNA processing; LOCATED IN: nucleus, cytoplasm; EXPRESSED IN: 23 plant struc…	10.8652	24.8148	2.28388	1.19149	0.00612454	0.0460336
LOC_Os09g23920		AT3G29076	transposable element gene \\ gypsy-like retrotransposon family, has a 9.1e-318 P-value blast match to GB:AAD27547 polyprotein (Gypsy_Ty3-element) (Oryza sativa subsp. indica)	10.5237	24.4898	2.32711	1.21854	0.00465393	0.0372796
LOC_Os01g64000	Similar to ABA response element binding factor (Fragment).	ABI5	Basic-leucine zipper (bZIP) transcription factor family protein \\ Encodes a member of the basic leucine zipper transcription factor family, involved in ABA signalling during seed maturation and germination. The Arabidopsis abscisic acid (ABA)-insensitive abi5 mutants have pleiotropic defects in ABA response, including decreased sensitivity to ABA inhibition of germination and altered expression …	6.26289	24.1817	3.8611	1.94901	4.5462e-05	0.000860316
LOC_Os10g02380	Aldo/keto reductase family protein.	AT1G59960	NAD(P)-linked oxidoreductase superfamily protein \\ NAD(P)-linked oxidoreductase superfamily protein; FUNCTIONS IN: oxidoreductase activity; INVOLVED IN: response to salt stress; EXPRESSED IN: 21 plant structures; EXPRESSED DURING: 13 growth stages; CONTAINS InterPro DOMAIN/s: Aldo/keto reductase (InterPro:IPR001395), Aldo/keto reductase subgroup (InterPro:IPR020471), Aldo/keto reductase, conserv…	8.88643	24.1559	2.71829	1.4427	0.00112598	0.0122571
LOC_Os03g16950	Similar to (clone wusl1032) mRNA sequence.	AT5G48540	receptor-like protein kinase-related family protein \\ receptor-like protein kinase-related family protein; FUNCTIONS IN: molecular_function unknown; INVOLVED IN: response to karrikin; LOCATED IN: endomembrane system; EXPRESSED IN: 21 plant structures; EXPRESSED DURING: 13 growth stages; CONTAINS InterPro DOMAIN/s: Protein of unknown function DUF26 (InterPro:IPR002902); BEST Arabidopsis thaliana …	9.22073	24.1392	2.61793	1.38842	0.00191604	0.0185208
LOC_Os07g46260		AT4G06604	transposable element gene \\ gypsy-like retrotransposon family, has a 1.4e-248 P-value blast match to GB:AAD19359 polyprotein (gypsy_Ty3-element) (Sorghum bicolor)	8.90795	24.1237	2.70811	1.43729	0.00163532	0.0163719
LOC_Os01g08440	UDP-glucuronosyl/UDP-glucosyltransferase family protein.	IAGLU	indole-3-acetate beta-D-glucosyltransferase \\ UDP-glucose:indole-3-acetate beta-D-glucosyltransferase \\ indole-3-acetate beta-D-glucosyltransferase (IAGLU); FUNCTIONS IN: UDP-glycosyltransferase activity, transferase activity, transferring glycosyl groups; INVOLVED IN: metabolic process; LOCATED IN: chloroplast; EXPRESSED IN: 17 plant structures; EXPRESSED DURING: 7 growth stages; CONTAINS Inte…	8.5508	23.8169	2.78534	1.47785	0.00214204	0.0202249
LOC_Os03g11780	Similar to Inhibin beta B chain precursor (Activin beta-B chain).			6.58262	23.791	3.61422	1.85368	0.000120474	0.00193295
LOC_Os01g72470	Conserved hypothetical protein.			8.55488	23.5215	2.74948	1.45916	0.000728271	0.00862165
LOC_Os11g38640	Domain of unknown function DUF629 domain containing protein.	AT3G47910	Ubiquitin carboxyl-terminal hydrolase-related protein \\ Ubiquitin carboxyl-terminal hydrolase-related protein; FUNCTIONS IN: ubiquitin thiolesterase activity, zinc ion binding; INVOLVED IN: ubiquitin-dependent protein catabolic process; LOCATED IN: intracellular; EXPRESSED IN: cultured cell; CONTAINS InterPro DOMAIN/s: Protein of unknown function DUF627 (InterPro:IPR006866), Peptidase C19, ubiqu…	8.56316	23.4842	2.74247	1.45548	0.000793069	0.00925909
LOC_Os05g19900		AT3G29076	transposable element gene \\ gypsy-like retrotransposon family, has a 9.1e-318 P-value blast match to GB:AAD27547 polyprotein (Gypsy_Ty3-element) (Oryza sativa subsp. indica)	9.21543	22.8007	2.47419	1.30696	0.00296973	0.0261675
LOC_Os07g39740	Similar to Esterase precursor (EC 3.1.1.-) (Early nodule-specific protein homolog) (Latex allergen Hev b 13).	AT3G26430	GDSL-like Lipase/Acylhydrolase superfamily protein \\ GDSL-like Lipase/Acylhydrolase superfamily protein; FUNCTIONS IN: hydrolase activity, acting on ester bonds, carboxylesterase activity; INVOLVED IN: lipid metabolic process; LOCATED IN: endomembrane system; EXPRESSED IN: guard cell; CONTAINS InterPro DOMAIN/s: Lipase, GDSL (InterPro:IPR001087); BEST Arabidopsis thaliana protein match is: alpha…	7.89323	22.1148	2.80175	1.48633	0.00129789	0.0137253
LOC_Os06g50040	Auxin responsive SAUR protein family protein.	AT3G61900	SAUR-like auxin-responsive protein family \\ SAUR-like auxin-responsive protein family ; CONTAINS InterPro DOMAIN/s: Auxin responsive SAUR protein (InterPro:IPR003676); BEST Arabidopsis thaliana protein match is: SAUR-like auxin-responsive protein family (TAIR:AT2G46690.1); Has 1394 Blast hits to 1380 proteins in 28 species: Archae - 0; Bacteria - 0; Metazoa - 0; Fungi - 0; Plants - 1393; Viruses…	6.58616	22.1072	3.35661	1.747	0.000407184	0.00540468
LOC_Os03g44020	Protein kinase-like domain containing protein.	PID	Protein kinase superfamily protein \\ Encodes a protein serine/threonine kinase that may act as a positive regulator of cellular auxin efflux, as a a binary switch for PIN polarity, and as a negative regulator of auxin signaling. Recessive mutants exhibit similar phenotypes as pin-formed mutants in flowers and inflorescence but distinct phenotypes in cotyledons and leaves. Expressed in the vascul…	7.58454	21.7926	2.87329	1.5227	0.00137871	0.0143739
LOC_Os11g01040	Alpha/beta hydrolase family protein.	AT2G39420	alpha/beta-Hydrolases superfamily protein \\ alpha/beta-Hydrolases superfamily protein; BEST Arabidopsis thaliana protein match is: alpha/beta-Hydrolases superfamily protein (TAIR:AT2G39410.2); Has 4720 Blast hits to 4720 proteins in 1453 species: Archae - 32; Bacteria - 3497; Metazoa - 120; Fungi - 143; Plants - 476; Viruses - 35; Other Eukaryotes - 417 (source: NCBI BLink).	9.2289	21.7848	2.3605	1.23909	0.00631643	0.0470057
LOC_Os10g01500	Hypothetical conserved gene.			5.27389	21.136	4.00766	2.00276	0.00020164	0.00300858
LOC_Os10g26300				7.9003	20.8264	2.63616	1.39844	0.00486212	0.0386385
LOC_Os02g51110	Aquaporin NIP III subfamily protein, Aquaporin, Silicon influx transporter, Arsenic species (As) uptake, Arsenite efflux, Selenite (Se) uptake, Water transport	NIP4;2	NOD26-like intrinsic protein 4;2 \\ NOD26-like intrinsic protein 4;2 (NIP4;2); FUNCTIONS IN: water channel activity; INVOLVED IN: transport, transmembrane transport; LOCATED IN: integral to membrane, membrane; EXPRESSED IN: root, flower, cultured cell, leaf; CONTAINS InterPro DOMAIN/s: Major intrinsic protein, conserved site (InterPro:IPR022357), Aquaporin (InterPro:IPR012269), Major intrinsic pr…	3.62423	20.7929	5.73719	2.52034	0.00246686	0.0226239
LOC_Os06g42090		AT5G29646	transposable element gene \\ CACTA-like transposase family (Tnp2/En/Spm), has a 1.9e-233 P-value blast match to gb|AAG52024.1|AC022456_5 Tam1-homologous transposon protein TNP2, putative; 12762-16371 (Arabidopsis thaliana) (CACTA-element)	8.23339	20.7894	2.52501	1.33629	0.00532703	0.041349
LOC_Os01g46260	Similar to GDSL-motif lipase/hydrolase-like protein.	AT5G45910	GDSL-like Lipase/Acylhydrolase superfamily protein \\ GDSL-like Lipase/Acylhydrolase superfamily protein; FUNCTIONS IN: hydrolase activity, acting on ester bonds, carboxylesterase activity; INVOLVED IN: lipid metabolic process; LOCATED IN: endomembrane system; EXPRESSED IN: 9 plant structures; EXPRESSED DURING: 4 anthesis, C globular stage, D bilateral stage; CONTAINS InterPro DOMAIN/s: Lipase, G…	6.58847	20.7829	3.15444	1.65738	0.000986287	0.010993
LOC_Os07g46350	Similar to Serine carboxypepsidase (Fragment).	scpl40	serine carboxypeptidase-like 40 \\ serine carboxypeptidase-like 40 (scpl40); FUNCTIONS IN: serine-type carboxypeptidase activity; INVOLVED IN: proteolysis; LOCATED IN: endomembrane system; EXPRESSED IN: 8 plant structures; EXPRESSED DURING: 4 anthesis, C globular stage, petal differentiation and expansion stage; CONTAINS InterPro DOMAIN/s: Peptidase S10, serine carboxypeptidase (InterPro:IPR00156…	6.89949	20.4899	2.96978	1.57035	0.00262743	0.0237231
LOC_Os05g49540		AT4G03810	transposable element gene \\ copia-like retrotransposon family, has a 0. P-value blast match to GB:BAA22288 pol polyprotein (Ty1_Copia-element) (Oryza australiensis)GB:BAA22288 polyprotein (Ty1_Copia-element) (Oryza australiensis)gi|2443320|dbj|BAA22288.1| polyprotein (RIRE1) (Oryza australiensis) (Ty1_Copia-element)	8.2346	20.1471	2.44664	1.2908	0.00668372	0.0488527
LOC_Os01g48360	Hypothetical conserved gene.			7.8897	20.1045	2.5482	1.34948	0.00398922	0.0330171
LOC_Os05g51860	Conserved hypothetical protein.	AT2G32970	unknown protein; Has 158 Blast hits to 154 proteins in 73 species: Archae - 0; Bacteria - 61; Metazoa - 0; Fungi - 0; Plants - 55; Viruses - 28; Other Eukaryotes - 14 (source: NCBI BLink).	4.2754	19.5282	4.56757	2.19143	2.0691e-05	0.000436933
LOC_Os10g38720	Similar to Glutathione S-transferase GST 20 (EC 2.5.1.18).	GSTU18	glutathione S-transferase TAU 18 \\ Encodes glutathione transferase belonging to the tau class of GSTs. Naming convention according to Wagner et al. (2002). \\ glutathione S-transferase TAU 18 (GSTU18); CONTAINS InterPro DOMAIN/s: Thioredoxin fold (InterPro:IPR012335), Glutathione S-transferase, C-terminal (InterPro:IPR004046), Glutathione S-transferase, C-terminal-like (InterPro:IPR010987), Glut…	8.23692	19.4548	2.3619	1.23995	0.00688854	0.049971
LOC_Os04g38720	Similar to H0219H12.10 protein.	NAC080	NAC domain containing protein 80 \\ NAC domain containing protein 80 (NAC080); FUNCTIONS IN: sequence-specific DNA binding transcription factor activity; INVOLVED IN: multicellular organismal development, regulation of transcription; LOCATED IN: cellular_component unknown; EXPRESSED IN: 12 plant structures; EXPRESSED DURING: LP.04 four leaves visible, 4 anthesis, C globular stage, petal different…	6.90479	19.1476	2.7731	1.4715	0.00332629	0.0287199
LOC_Os11g23820		AT5G29646	transposable element gene \\ CACTA-like transposase family (Tnp2/En/Spm), has a 1.9e-233 P-value blast match to gb|AAG52024.1|AC022456_5 Tam1-homologous transposon protein TNP2, putative; 12762-16371 (Arabidopsis thaliana) (CACTA-element)	6.91527	19.1273	2.76595	1.46777	0.00470821	0.0376365
LOC_Os06g46040				7.23037	18.7958	2.59956	1.37827	0.00571088	0.0436029
LOC_Os08g12449				6.90534	18.7765	2.71914	1.44315	0.00403524	0.0332674
LOC_Os02g19280		AT1G54430	transposable element gene \\ similar to unknown protein [Arabidopsis thaliana] (TAIR:AT3G13250.1); similar to unknown protein [Arabidopsis thaliana] (TAIR:AT3G30420.1); similar to AT hook motif-containing protein-related [Arabidopsis thaliana] (TAIR:AT3G42100.1); similar to AT hook motif-containing protein, putative [Oryza sativa (japonica cultivar-group)] (GB:ABA94947.1); similar to Protein of u…	4.28478	18.4567	4.30749	2.10685	0.000234089	0.00340082
LOC_Os05g36900	Zinc finger, Dof-type family protein.	AT3G52440	Dof-type zinc finger DNA-binding family protein \\ Dof-type zinc finger DNA-binding family protein; CONTAINS InterPro DOMAIN/s: Zinc finger, Dof-type (InterPro:IPR003851); BEST Arabidopsis thaliana protein match is: Dof-type zinc finger DNA-binding family protein (TAIR:AT1G21340.1); Has 1099 Blast hits to 1090 proteins in 57 species: Archae - 0; Bacteria - 0; Metazoa - 2; Fungi - 0; Plants - 1092…	7.24439	18.1356	2.5034	1.32389	0.00679601	0.0494456
LOC_Os02g03360				2.30314	18.0944	7.8564	2.97387	8.84496e-06	0.000207515
LOC_Os12g36830	Similar to Probenazole-inducible protein PBZ1.			5.93322	17.4704	2.9445	1.55802	0.00530247	0.041217
LOC_Os05g38880	Conserved hypothetical protein.			1.97579	17.4277	8.82062	3.14088	3.71926e-06	9.591e-05
LOC_Os12g01030	Alpha/beta hydrolase family protein.	AT2G39420	alpha/beta-Hydrolases superfamily protein \\ alpha/beta-Hydrolases superfamily protein; BEST Arabidopsis thaliana protein match is: alpha/beta-Hydrolases superfamily protein (TAIR:AT2G39410.2); Has 4720 Blast hits to 4720 proteins in 1453 species: Archae - 32; Bacteria - 3497; Metazoa - 120; Fungi - 143; Plants - 476; Viruses - 35; Other Eukaryotes - 417 (source: NCBI BLink).	6.25881	17.4226	2.7837	1.477	0.00546498	0.0421898
LOC_Os12g12860	Similar to Protein kinase-like protein.	CPK7	calmodulin-domain protein kinase 7 \\ calmodulin-domain protein kinase CDPK isoform 7 (CPK7) \\ calmodulin-domain protein kinase 7 (CPK7); FUNCTIONS IN: in 6 functions; INVOLVED IN: protein amino acid phosphorylation, N-terminal protein myristoylation; LOCATED IN: plasma membrane; EXPRESSED IN: 23 plant structures; EXPRESSED DURING: 13 growth stages; CONTAINS InterPro DOMAIN/s: Protein kinase, AT…	5.93146	17.0732	2.87842	1.52528	0.00473126	0.037765
LOC_Os01g28744	Similar to H0124E07.4 protein.			3.28695	16.8112	5.11452	2.3546	0.000546214	0.00682477
LOC_Os03g60010		AT5G29646	transposable element gene \\ CACTA-like transposase family (Tnp2/En/Spm), has a 1.9e-233 P-value blast match to gb|AAG52024.1|AC022456_5 Tam1-homologous transposon protein TNP2, putative; 12762-16371 (Arabidopsis thaliana) (CACTA-element)	5.59716	16.778	2.99759	1.5838	0.00360676	0.0306813
LOC_Os08g16690				4.94356	16.4645	3.33049	1.73574	0.00162856	0.0163103
LOC_Os12g01860		AT5G29646	transposable element gene \\ CACTA-like transposase family (Tnp2/En/Spm), has a 1.9e-233 P-value blast match to gb|AAG52024.1|AC022456_5 Tam1-homologous transposon protein TNP2, putative; 12762-16371 (Arabidopsis thaliana) (CACTA-element)	3.29567	16.0958	4.88392	2.28804	0.000357747	0.00484112
LOC_Os06g30370	Similar to MOTHER of FT and TF1 protein.	E12A11	PEBP (phosphatidylethanolamine-binding protein) family protein \\ Encodes a member of the FT and TFL1 family of phosphatidylethanolamine-binding proteins. It is expressed in seeds and up-regulated in response to ABA. Loss of function mutants show decreased rate of germination in the presence of ABA. ABA dependent regulation is mediated by both ABI3 and ABI5. ABI5 promotes MFT expression, primaril…	1.97116	15.7579	7.99427	2.99897	8.92056e-05	0.00150443
LOC_Os11g26760	Dehydrin RAB 16C.	XERO1	dehydrin xero 1 \\ dehydrin xero 1 (XERO1); FUNCTIONS IN: molecular_function unknown; INVOLVED IN: response to water, response to stress; LOCATED IN: cellular_component unknown; EXPRESSED IN: shoot apex, inflorescence meristem, petal, leaf whorl, seed; EXPRESSED DURING: F mature embryo stage, petal differentiation and expansion stage, E expanded cotyledon stage; CONTAINS InterPro DOMAIN/s: Dehydr…	3.94982	15.3969	3.89814	1.96278	0.000457463	0.00593518
LOC_Os12g40050		AT4G04145	transposable element gene \\ copia-like retrotransposon family, has a 1.8e-189 P-value blast match to GB:AAA57005 Hopscotch polyprotein (Ty1_Copia-element) (Zea mays)	1.98451	15.0823	7.60002	2.926	0.000835288	0.00964379
LOC_Os03g47720	Ankyrin repeat domain containing protein.	AT3G04710	ankyrin repeat family protein \\ ankyrin repeat family protein; FUNCTIONS IN: binding; INVOLVED IN: biological_process unknown; LOCATED IN: cellular_component unknown; EXPRESSED IN: 22 plant structures; EXPRESSED DURING: 14 growth stages; CONTAINS InterPro DOMAIN/s: Tetratricopeptide-like helical (InterPro:IPR011990), Ankyrin repeat-containing domain (InterPro:IPR020683), Tetratricopeptide repeat…	1.31293	14.7843	11.2605	3.4932	0.00117959	0.0127432
LOC_Os07g04280				2.96601	14.4337	4.86638	2.28285	0.000337411	0.00461208
LOC_Os01g37600	Hypothetical conserved gene.	AT1G09320	agenet domain-containing protein \\ agenet domain-containing protein; FUNCTIONS IN: RNA binding; INVOLVED IN: biological_process unknown; LOCATED IN: chloroplast; EXPRESSED IN: 24 plant structures; EXPRESSED DURING: 15 growth stages; CONTAINS InterPro DOMAIN/s: Tudor-like, plant (InterPro:IPR014002), Agenet (InterPro:IPR008395); BEST Arabidopsis thaliana protein match is: agenet domain-containing…	4.27893	14.4131	3.36838	1.75205	0.00305121	0.0266779
LOC_Os02g50660		AT5G29646	transposable element gene \\ CACTA-like transposase family (Tnp2/En/Spm), has a 1.9e-233 P-value blast match to gb|AAG52024.1|AC022456_5 Tam1-homologous transposon protein TNP2, putative; 12762-16371 (Arabidopsis thaliana) (CACTA-element)	2.96601	14.0946	4.75205	2.24855	0.000770462	0.00904198
LOC_Os04g25050		AT5G29646	transposable element gene \\ CACTA-like transposase family (Tnp2/En/Spm), has a 1.9e-233 P-value blast match to gb|AAG52024.1|AC022456_5 Tam1-homologous transposon protein TNP2, putative; 12762-16371 (Arabidopsis thaliana) (CACTA-element)	2.63457	14.0856	5.34644	2.41858	0.000558651	0.00692897
LOC_Os10g01680		AT5G17540	HXXXD-type acyl-transferase family protein \\ HXXXD-type acyl-transferase family protein; FUNCTIONS IN: transferase activity, transferring acyl groups other than amino-acyl groups; INVOLVED IN: biological_process unknown; LOCATED IN: cellular_component unknown; EXPRESSED IN: 9 plant structures; EXPRESSED DURING: 4 anthesis, C globular stage, F mature embryo stage, petal differentiation and expans…	2.30899	14.0842	6.09974	2.60875	0.000148833	0.00231383
LOC_Os03g62830	Hypothetical conserved gene.	AT4G17520	Hyaluronan / mRNA binding family \\ Hyaluronan / mRNA binding family; FUNCTIONS IN: RNA binding; INVOLVED IN: biological_process unknown; LOCATED IN: nucleus, peroxisome; EXPRESSED IN: 23 plant structures; EXPRESSED DURING: 14 growth stages; CONTAINS InterPro DOMAIN/s: Stm1, N-terminal (InterPro:IPR019084), Hyaluronan/mRNA-binding protein (InterPro:IPR006861); BEST Arabidopsis thaliana protein ma…	4.27132	13.7851	3.22737	1.69036	0.00479419	0.0382221
LOC_Os12g25830	Retrotransposon protein, putative, unclassified	AT3G42057	transposable element gene \\ gypsy-like retrotransposon family, has a 1.6e-177 P-value blast match to GB:AAD19359 polyprotein (gypsy_Ty3-element) (Sorghum bicolor)	3.28927	13.4345	4.08433	2.0301	0.00153291	0.015597
LOC_Os02g40530	Similar to Snapdragon myb protein 305 homolog.	MYB79	myb domain protein 79 \\ Member of the R2R3 factor gene family. \\ myb domain protein 79 (MYB79); FUNCTIONS IN: DNA binding, sequence-specific DNA binding transcription factor activity; INVOLVED IN: regulation of transcription, DNA-dependent, regulation of transcription; CONTAINS InterPro DOMAIN/s: SANT, DNA-binding (InterPro:IPR001005), Homeodomain-like (InterPro:IPR009057), Myb, DNA-binding (In…	2.96777	12.7664	4.30169	2.10491	0.00134247	0.0141084
LOC_Os05g43940	Similar to O-methyltransferase ZRP4 (EC 2.1.1.-) (OMT).	AT4G35160	O-methyltransferase family protein \\ O-methyltransferase family protein; FUNCTIONS IN: methyltransferase activity, O-methyltransferase activity, protein dimerization activity; LOCATED IN: cytosol; CONTAINS InterPro DOMAIN/s: Winged helix-turn-helix transcription repressor DNA-binding (InterPro:IPR011991), Plant methyltransferase dimerisation (InterPro:IPR012967), O-methyltransferase, family 2 (I…	2.95552	12.426	4.20433	2.07188	0.00293328	0.0259562
LOC_Os07g31530		AT1G35390	transposable element gene \\ non-LTR retrotransposon family (LINE), has a 2.6e-43 P-value blast match to GB:AAA67727 reverse transcriptase (LINE-element) (Mus musculus)	3.626	12.3952	3.41844	1.77334	0.00670395	0.048947
LOC_Os11g30060	Similar to NB-ARC domain containing protein.	AT3G14470	NB-ARC domain-containing disease resistance protein \\ NB-ARC domain-containing disease resistance protein; FUNCTIONS IN: protein binding; INVOLVED IN: apoptosis, defense response; LOCATED IN: endomembrane system; EXPRESSED IN: 23 plant structures; EXPRESSED DURING: 14 growth stages; CONTAINS InterPro DOMAIN/s: Leucine-rich repeat-containing protein (InterPro:IPR015766), NB-ARC (InterPro:IPR00218…	2.63225	12.0895	4.59282	2.19938	0.00355646	0.0303393
LOC_Os09g16950	Protein kinase, core domain containing protein.	AT5G10530	Concanavalin A-like lectin protein kinase family protein \\ Concanavalin A-like lectin protein kinase family protein; FUNCTIONS IN: kinase activity; INVOLVED IN: protein amino acid phosphorylation; LOCATED IN: endomembrane system; EXPRESSED IN: root; CONTAINS InterPro DOMAIN/s: Legume lectin, beta chain (InterPro:IPR001220), Protein kinase, ATP binding site (InterPro:IPR017441), Serine/threonine-…	2.62232	11.0953	4.23111	2.08104	0.00389725	0.0324902
LOC_Os11g45130	Hypothetical conserved gene.	AT1G58390	Disease resistance protein (CC-NBS-LRR class) family \\ Disease resistance protein (CC-NBS-LRR class) family; FUNCTIONS IN: ATP binding; INVOLVED IN: defense response, apoptosis; LOCATED IN: cellular_component unknown; EXPRESSED IN: 8 plant structures; EXPRESSED DURING: 4 anthesis, F mature embryo stage, petal differentiation and expansion stage, LP.08 eight leaves visible, D bilateral stage; CON…	1.97811	11.0748	5.59866	2.48508	0.00104544	0.0115477
LOC_Os02g45160	Similar to ALMT3.	AT4G00910	Aluminium activated malate transporter family protein \\ Aluminium activated malate transporter family protein; FUNCTIONS IN: molecular_function unknown; INVOLVED IN: response to aluminum ion; LOCATED IN: cellular_component unknown; EXPRESSED IN: sepal, root, pedicel; EXPRESSED DURING: 4 anthesis; CONTAINS InterPro DOMAIN/s: Malate transporter, aliminium toerance (InterPro:IPR020966); BEST Arabid…	2.29729	11.0555	4.81243	2.26676	0.00284296	0.0252515
LOC_Os02g15350	Dof zinc finger transcriptional activator, Dof zinc finger transcription factor, Grain filling, GA response in aleurone cell	TMO6	TARGET OF MONOPTEROS 6 \\ Encodes a Dof-type transcription factor. \\ TARGET OF MONOPTEROS 6 (TMO6); CONTAINS InterPro DOMAIN/s: Zinc finger, Dof-type (InterPro:IPR003851); BEST Arabidopsis thaliana protein match is: Dof-type zinc finger DNA-binding family protein (TAIR:AT3G45610.1); Has 30201 Blast hits to 17322 proteins in 780 species: Archae - 12; Bacteria - 1396; Metazoa - 17338; Fungi - 3422…	0.987896	9.73641	9.85571	3.30096	0.000778172	0.00910551
LOC_Os02g06410	Similar to SNF4.	AT1G15330	Cystathionine beta-synthase (CBS) protein \\ Cystathionine beta-synthase (CBS) protein; CONTAINS InterPro DOMAIN/s: Cystathionine beta-synthase, core (InterPro:IPR000644); BEST Arabidopsis thaliana protein match is: Cystathionine beta-synthase (CBS) family protein (TAIR:AT1G80090.1); Has 526 Blast hits to 526 proteins in 132 species: Archae - 6; Bacteria - 4; Metazoa - 257; Fungi - 91; Plants - 1…	1.97524	9.39731	4.75755	2.25022	0.00442216	0.0358477
LOC_Os06g36930	Putative heat stress transcription factor A-6a.	HSFA2	heat shock transcription factor A2 \\ member of Heat Stress Transcription Factor (Hsf) family. Involved in response to misfolded protein accumulation in the cytosol. Regulated by alternative splicing and non-sense-mediated decay. \\ heat shock transcription factor A2 (HSFA2); FUNCTIONS IN: DNA binding, transcription activator activity, sequence-specific DNA binding transcription factor activity; …	0.656463	9.0608	13.8024	3.78685	0.000466063	0.0060294
LOC_Os08g28400	Carotenoid oxygenase domain containing protein.	AT5G29646	transposable element gene \\ CACTA-like transposase family (Tnp2/En/Spm), has a 1.9e-233 P-value blast match to gb|AAG52024.1|AC022456_5 Tam1-homologous transposon protein TNP2, putative; 12762-16371 (Arabidopsis thaliana) (CACTA-element)	0.98613	8.72938	8.85216	3.14603	0.00296338	0.0261456
LOC_Os12g40030	Retrotransposon protein, putative, Ty3-gypsy subclass	AT2G06470	transposable element gene \\ gypsy-like retrotransposon family, has a 0. P-value blast match to GB:AAD27547 polyprotein (Gypsy_Ty3-element) (Oryza sativa subsp. indica)	0.662865	8.38508	12.6498	3.66104	0.00144283	0.0149084
LOC_Os05g15300	Prefoldin domain containing protein.			1.31701	8.37346	6.35793	2.66856	0.00387627	0.0323533
LOC_Os03g28230		AT1G42110	transposable element gene \\ hAT-like transposase family (hobo/Ac/Tam3), has a 3.5e-136 P-value blast match to GB:AAD24567 transposase Tag2 (hAT-element) (Arabidopsis thaliana)	0.331432	8.07817	24.3735	4.60724	5.4003e-05	0.000983066
LOC_Os07g39960	Zinc finger, C2H2-type domain containing protein.	AT3G49930	C2H2 and C2HC zinc fingers superfamily protein \\ C2H2 and C2HC zinc fingers superfamily protein; FUNCTIONS IN: sequence-specific DNA binding transcription factor activity, zinc ion binding, nucleic acid binding; INVOLVED IN: regulation of transcription; LOCATED IN: intracellular; EXPRESSED IN: 15 plant structures; EXPRESSED DURING: 9 growth stages; CONTAINS InterPro DOMAIN/s: Zinc finger, C2H2-l…	0.654698	8.06395	12.3171	3.62259	0.00150579	0.0154234
LOC_Os10g43020				0.658229	7.38449	11.2187	3.48784	0.00279835	0.0249582
LOC_Os06g19300				0.987896	7.37161	7.46193	2.89955	0.00317817	0.027611
LOC_Os09g15570				0.658781	7.05961	10.7162	3.42172	0.00381226	0.0319333
LOC_Os06g47270	Zinc finger, RING/FYVE/PHD-type domain containing protein.			0.983812	7.04404	7.15994	2.83995	0.00654339	0.0482172
LOC_Os07g22224				0.331432	6.71397	20.2574	4.34038	0.00187521	0.0182003
LOC_Os10g32640				0.658781	6.69081	10.1563	3.34431	0.00317846	0.027611
LOC_Os04g58010	Similar to H0101F08.6 protein.	ABI3	AP2/B3-like transcriptional factor family protein \\ Homologous to the maize transcription factor Viviparous-1. Full length ABI3 protein binds to the highly conserved RY motif [DNA motif CATGCA(TG)], present in many seed-specific promoters, and the B3 domains of this transcription factor is necessary for the specific interaction with the RY element. Transcriptional activity of ABI3 requires the B…	0.327349	6.3813	19.4939	4.28495	0.00147925	0.0152168
LOC_Os09g06820		AT3G42622	transposable element gene \\ gypsy-like retrotransposon family, has a 0. P-value blast match to GB:AAD22153 polyprotein (Gypsy_Ty3-element) (Sorghum bicolor)	0.656463	6.37227	9.70696	3.27902	0.0061714	0.0462958
LOC_Os06g17000	BURP domain containing protein.	RD22	BURP domain-containing protein \\ responsive to dehydration 22 (RD22) mediated by ABA \\ RESPONSIVE TO DESSICATION 22 (RD22); FUNCTIONS IN: nutrient reservoir activity; INVOLVED IN: response to desiccation, response to salt stress, response to abscisic acid stimulus; LOCATED IN: endomembrane system; EXPRESSED IN: 21 plant structures; EXPRESSED DURING: 13 growth stages; CONTAINS InterPro DOMAIN/s:…	0	6.36977	Inf	20	0.000763342	0.0089662
LOC_Os01g28290	Cytochrome P450 domain containing protein.	ATCG00350.1	Photosystem I, PsaA/PsaB protein \\ Encodes psaA protein comprising the reaction center for photosystem I along with psaB protein; hydrophobic protein encoded by the chloroplast genome. \\ PSAA; FUNCTIONS IN: chlorophyll binding; INVOLVED IN: photosynthesis; LOCATED IN: in 6 components; EXPRESSED IN: 24 plant structures; EXPRESSED DURING: 13 growth stages; CONTAINS InterPro DOMAIN/s: Photosystem …	0.658781	6.06026	9.1992	3.20151	0.00663964	0.0486218
LOC_Os10g41100	Similar to CONSTANS-like protein CO9 (Fragment).	COL5	CONSTANS-like 5 \\ CONSTANS-like 5 (COL5); FUNCTIONS IN: sequence-specific DNA binding transcription factor activity, zinc ion binding; INVOLVED IN: regulation of transcription; LOCATED IN: intracellular; EXPRESSED IN: 23 plant structures; EXPRESSED DURING: 13 growth stages; CONTAINS InterPro DOMAIN/s: CCT domain (InterPro:IPR010402), Zinc finger, B-box (InterPro:IPR000315); BEST Arabidopsis thal…	0.327349	6.05382	18.4935	4.20895	0.00272394	0.0244558
LOC_Os01g22780	Similar to Alpha-L-fucosidase 2.	AT1G56670	GDSL-like Lipase/Acylhydrolase superfamily protein \\ GDSL-like Lipase/Acylhydrolase superfamily protein; FUNCTIONS IN: hydrolase activity, acting on ester bonds, carboxylesterase activity; INVOLVED IN: lipid metabolic process; LOCATED IN: endomembrane system; EXPRESSED IN: 10 plant structures; EXPRESSED DURING: 6 growth stages; CONTAINS InterPro DOMAIN/s: Lipase, GDSL (InterPro:IPR001087); BEST …	0	5.67734	Inf	20	0.00627667	0.0468387
LOC_Os11g12470	Protein of unknown function DUF295 family protein.			0	5.36658	Inf	20	0.00218833	0.0205686
LOC_Os07g02500	Hypothetical conserved gene.	AT2G24960	unknown protein; BEST Arabidopsis thaliana protein match is: unknown protein (TAIR:AT4G02210.2); Has 1453 Blast hits to 509 proteins in 26 species: Archae - 0; Bacteria - 0; Metazoa - 1; Fungi - 39; Plants - 1363; Viruses - 0; Other Eukaryotes - 50 (source: NCBI BLink).	0.329115	5.03776	15.307	3.93612	0.00596386	0.0451394
LOC_Os10g26940	Similar to Polygalacturonase isoenzyme 1 beta subunit precursor.	PG2	polygalacturonase 2 \\ polygalacturonase 2 (PG2); FUNCTIONS IN: polygalacturonase activity; INVOLVED IN: biological_process unknown; LOCATED IN: endomembrane system; EXPRESSED IN: 23 plant structures; EXPRESSED DURING: 13 growth stages; CONTAINS InterPro DOMAIN/s: BURP (InterPro:IPR004873); BEST Arabidopsis thaliana protein match is: BURP domain-containing protein (TAIR:AT1G23760.1); Has 2933 Bla…	0	4.34273	Inf	20	0.00615451	0.0462075
LOC_Os11g24320	Putative serine carboxypeptidase I-related	scpl17	serine carboxypeptidase-like 17 \\ serine carboxypeptidase-like 17 (scpl17); FUNCTIONS IN: serine-type carboxypeptidase activity; INVOLVED IN: proteolysis; LOCATED IN: endomembrane system; CONTAINS InterPro DOMAIN/s: Peptidase S10, serine carboxypeptidase (InterPro:IPR001563); BEST Arabidopsis thaliana protein match is: serine carboxypeptidase-like 16 (TAIR:AT3G12220.1); Has 3617 Blast hits to 35…	0	4.02554	Inf	20	0.00594619	0.0450561

## Sheet: Table S5
AccID	Description	Blast_Symbol	Blast_Description	WT_4mm	osvil2_4mm	FoldChange	Log2FC	P-Value	FDR
LOC_Os12g24790	Hypothetical conserved gene.	AT5G41835	transposable element gene \\ non-LTR retrotransposon family (LINE), has a 1.2e-43 P-value blast match to GB:AAB41224 ORF2 (LINE-element) (Rattus norvegicus)	864.747	382.788	0.442659	-1.17573	1.92212e-06	5.3881e-05
LOC_Os07g05740	Similar to predicted protein.	AT1G17230	Leucine-rich receptor-like protein kinase family protein \\ Leucine-rich receptor-like protein kinase family protein; FUNCTIONS IN: protein serine/threonine kinase activity, protein kinase activity, ATP binding; INVOLVED IN: protein amino acid phosphorylation; LOCATED IN: endomembrane system; EXPRESSED IN: 11 plant structures; EXPRESSED DURING: 6 growth stages; CONTAINS InterPro DOMAIN/s: Serine/…	760.023	359.578	0.473115	-1.07974	9.6242e-15	1.15197e-12
LOC_Os06g29350	Similar to Myosin heavy chain (Fragment).	XIE	Myosin family protein with Dil domain \\ member of Myosin-like proteins \\ XIE; CONTAINS InterPro DOMAIN/s: Dil domain (InterPro:IPR018444), Dilute (InterPro:IPR002710), Myosin, N-terminal, SH3-like (InterPro:IPR004009), Myosin head, motor domain (InterPro:IPR001609), IQ calmodulin-binding region (InterPro:IPR000048); BEST Arabidopsis thaliana protein match is: Myosin family protein with Dil doma…	553.871	271.528	0.490237	-1.02845	5.1681e-22	1.12744e-19
LOC_Os03g02860	Heavy metal transport/detoxification protein domain containing protein.	AT2G18196	Heavy metal transport/detoxification superfamily protein \\ Heavy metal transport/detoxification superfamily protein ; FUNCTIONS IN: metal ion binding; INVOLVED IN: metal ion transport; LOCATED IN: cellular_component unknown; CONTAINS InterPro DOMAIN/s: Heavy metal transport/detoxification protein (InterPro:IPR006121); BEST Arabidopsis thaliana protein match is: Heavy metal transport/detoxificati…	418.344	206.393	0.493358	-1.01929	4.36086e-18	7.02177e-16
LOC_Os07g11770	Conserved hypothetical protein.			414.663	189.631	0.457314	-1.12874	7.75961e-22	1.66592e-19
LOC_Os06g11190	Peptidase S9, prolyl oligopeptidase active site region domain containing protein.	AT5G36210	alpha/beta-Hydrolases superfamily protein \\ alpha/beta-Hydrolases superfamily protein; FUNCTIONS IN: serine-type peptidase activity; INVOLVED IN: proteolysis; LOCATED IN: chloroplast; EXPRESSED IN: 24 plant structures; EXPRESSED DURING: 14 growth stages; CONTAINS InterPro DOMAIN/s: Peptidase S9, prolyl oligopeptidase, catalytic domain (InterPro:IPR001375); BEST Arabidopsis thaliana protein match…	385.753	175.644	0.455327	-1.13502	1.03264e-20	2.06918e-18
LOC_Os06g38990	Protein kinase, core domain containing protein.	AT1G34110	Leucine-rich receptor-like protein kinase family protein \\ Leucine-rich receptor-like protein kinase family protein; FUNCTIONS IN: protein serine/threonine kinase activity, protein kinase activity, ATP binding; INVOLVED IN: transmembrane receptor protein tyrosine kinase signaling pathway, protein amino acid phosphorylation; LOCATED IN: endomembrane system; EXPRESSED IN: 13 plant structures; EXPR…	384.979	167.59	0.435323	-1.19984	7.38173e-23	1.69223e-20
LOC_Os04g25960	Similar to H0107B07.3 protein.	AT4G31880	LOCATED IN: cytosol, chloroplast; EXPRESSED IN: 24 plant structures; EXPRESSED DURING: 14 growth stages; BEST Arabidopsis thaliana protein match is: Tudor/PWWP/MBT superfamily protein (TAIR:AT1G15940.1); Has 137162 Blast hits to 70781 proteins in 2973 species: Archae - 289; Bacteria - 24182; Metazoa - 56725; Fungi - 20130; Plants - 6559; Viruses - 758; Other Eukaryotes - 28519 (source: NCBI BLink…	366.148	166.721	0.455338	-1.13499	7.43171e-20	1.42578e-17
LOC_Os09g32440	Similar to Type II inositol-1,4,5-trisphosphate 5-phosphatase 12 (EC 3.1.3.36) (At5PTase12) (FRAGILE FIBER3 protein).	AT2G43900	Endonuclease/exonuclease/phosphatase family protein \\ Endonuclease/exonuclease/phosphatase family protein; FUNCTIONS IN: inositol-polyphosphate 5-phosphatase activity, inositol or phosphatidylinositol phosphatase activity; INVOLVED IN: biological_process unknown; LOCATED IN: CUL4 RING ubiquitin ligase complex; EXPRESSED IN: sperm cell, male gametophyte, flower, cultured cell, pollen tube; EXPRES…	310.178	126.983	0.409387	-1.28846	6.03701e-21	1.22787e-18
LOC_Os03g48310	Plasma membrane H ATPase (EC 3.6.3.6) (H-ATPase).	HA11	H(+)-ATPase 11 \\ H(+)-ATPase 11 (HA11); FUNCTIONS IN: ATPase activity; INVOLVED IN: cation transport, metabolic process, ATP biosynthetic process; LOCATED IN: plasma membrane, membrane; EXPRESSED IN: 26 plant structures; EXPRESSED DURING: 14 growth stages; CONTAINS InterPro DOMAIN/s: ATPase, P-type, ATPase-associated domain (InterPro:IPR008250), ATPase, P-type cation-transporter, N-terminal (Int…	268.105	103.384	0.385609	-1.37479	2.22136e-21	4.58702e-19
LOC_Os01g35330	Protein of unknown function DUF3778 domain containing protein.			262.775	15.1647	0.0577098	-4.11504	4.22507e-17	6.24548e-15
LOC_Os03g10640	Similar to Calcium-transporting ATPase 2, plasma membrane-type (EC 3.6.3.8) (Ca(2 )-ATPase isoform 2).	ACA2	calcium ATPase 2 \\ Encodes a calmodulin-regulated Ca(2+)-pump located in the endoplasmic reticulum. Belongs to plant 2B ATPase's with an N-terminal autoinhibitor. \\ calcium ATPase 2 (ACA2); FUNCTIONS IN: calcium-transporting ATPase activity, calmodulin binding, calcium ion transmembrane transporter activity; INVOLVED IN: transport; LOCATED IN: endoplasmic reticulum, plasma membrane, endoplasmic…	240.75	89.5603	0.372005	-1.42661	0.000741139	0.008751
LOC_Os04g35940	Cyclin-like F-box domain containing protein.	AT1G78760	F-box/RNI-like superfamily protein \\ F-box/RNI-like superfamily protein; CONTAINS InterPro DOMAIN/s: FBD (InterPro:IPR013596), F-box domain, cyclin-like (InterPro:IPR001810), F-box domain, Skp2-like (InterPro:IPR022364), FBD-like (InterPro:IPR006566); BEST Arabidopsis thaliana protein match is: F-box/RNI-like superfamily protein (TAIR:AT1G78750.1); Has 2221 Blast hits to 2170 proteins in 29 spec…	239.394	101.246	0.422926	-1.24152	4.47751e-15	5.53065e-13
LOC_Os11g07060	Protein kinase, core domain containing protein.	AT3G47570	Leucine-rich repeat protein kinase family protein \\ Leucine-rich repeat protein kinase family protein; FUNCTIONS IN: protein serine/threonine kinase activity, kinase activity, ATP binding; INVOLVED IN: transmembrane receptor protein tyrosine kinase signaling pathway, protein amino acid phosphorylation; LOCATED IN: plasma membrane; EXPRESSED IN: 13 plant structures; EXPRESSED DURING: 8 growth sta…	232.385	107.054	0.460674	-1.11818	1.27854e-13	1.26688e-11
LOC_Os08g02094	Lipase, GDSL domain containing protein.	AT1G71691	GDSL-like Lipase/Acylhydrolase superfamily protein \\ GDSL-like Lipase/Acylhydrolase superfamily protein; FUNCTIONS IN: hydrolase activity, acting on ester bonds, carboxylesterase activity; INVOLVED IN: lipid metabolic process; EXPRESSED IN: 10 plant structures; EXPRESSED DURING: 6 growth stages; CONTAINS InterPro DOMAIN/s: Lipase, GDSL (InterPro:IPR001087); BEST Arabidopsis thaliana protein matc…	226.82	103.299	0.455423	-1.13472	6.75918e-11	4.71244e-09
LOC_Os07g17220	Disease resistance protein domain containing protein.	AT3G14460	LRR and NB-ARC domains-containing disease resistance protein \\ LRR and NB-ARC domains-containing disease resistance protein; FUNCTIONS IN: ATP binding; INVOLVED IN: apoptosis, defense response; CONTAINS InterPro DOMAIN/s: NB-ARC (InterPro:IPR002182), Leucine-rich repeat (InterPro:IPR001611), Disease resistance protein (InterPro:IPR000767); BEST Arabidopsis thaliana protein match is: NB-ARC domai…	225.514	111.165	0.492941	-1.02051	5.53552e-12	4.53762e-10
LOC_Os02g45054	Zinc finger, C2H2-type domain containing protein.	IDD4	indeterminate(ID)-domain 4 \\ indeterminate(ID)-domain 4 (IDD4); FUNCTIONS IN: sequence-specific DNA binding transcription factor activity; LOCATED IN: intracellular, chloroplast; EXPRESSED IN: 20 plant structures; EXPRESSED DURING: 13 growth stages; CONTAINS InterPro DOMAIN/s: Zinc finger, C2H2-like (InterPro:IPR015880), Zinc finger, C2H2-type (InterPro:IPR007087), Zinc finger, double-stranded R…	214.62	69.4311	0.323508	-1.62813	3.87571e-06	9.90944e-05
LOC_Os09g12240	Protein kinase, core domain containing protein.	BRL1	BRI1 like \\ mutant has Altered vascular cell differentiation; LRR Receptor Kinase \\ BRI1 like (BRL1); FUNCTIONS IN: kinase activity; INVOLVED IN: protein amino acid phosphorylation; LOCATED IN: plasma membrane; EXPRESSED IN: 9 plant structures; EXPRESSED DURING: 4 anthesis, petal differentiation and expansion stage; CONTAINS InterPro DOMAIN/s: Protein kinase, ATP binding site (InterPro:IPR01744…	207.149	84.2631	0.406774	-1.2977	2.96965e-16	4.09857e-14
LOC_Os08g36390	Zinc finger, C2H2 domain containing protein.	SGR5	C2H2-like zinc finger protein \\ May be involved in an early event in shoot gravitropism such as gravity perception and/or a signaling process subsequent to amyloplast sedimentation as a putative transcription factor in gravity-perceptive cells. \\ SHOOT GRAVITROPISM 5 (SGR5); CONTAINS InterPro DOMAIN/s: Zinc finger, C2H2-like (InterPro:IPR015880), Zinc finger, C2H2-type (InterPro:IPR007087); BES…	204.468	91.5818	0.447902	-1.15874	1.02425e-05	0.000235203
LOC_Os08g10440	NB-ARC domain containing protein.	RPM1	NB-ARC domain-containing disease resistance protein \\ Contains an N-terminal tripartite nucleotide binding site and a C-terminal tandem array of leucine-rich repeats. Confers resistance to Pseudomonas syringae strains that carry the avirulence genes avrB and avrRpm1. \\ RESISTANCE TO P. SYRINGAE PV MACULICOLA 1 (RPM1); FUNCTIONS IN: protein binding, nucleotide binding; INVOLVED IN: defense respo…	182.138	75.5096	0.414574	-1.2703	7.38312e-14	7.74111e-12
LOC_Os07g17230	Disease resistance protein domain containing protein.	AT3G14460	LRR and NB-ARC domains-containing disease resistance protein \\ LRR and NB-ARC domains-containing disease resistance protein; FUNCTIONS IN: ATP binding; INVOLVED IN: apoptosis, defense response; CONTAINS InterPro DOMAIN/s: NB-ARC (InterPro:IPR002182), Leucine-rich repeat (InterPro:IPR001611), Disease resistance protein (InterPro:IPR000767); BEST Arabidopsis thaliana protein match is: NB-ARC domai…	177.809	71.4953	0.402091	-1.3144	3.07386e-14	3.43599e-12
LOC_Os07g33540		CYP716A1	cytochrome P450, family 716, subfamily A, polypeptide 1 \\ member of CYP716A \\ cytochrome P450, family 716, subfamily A, polypeptide 1 (CYP716A1); FUNCTIONS IN: electron carrier activity, monooxygenase activity, iron ion binding, oxygen binding, heme binding; INVOLVED IN: oxidation reduction; LOCATED IN: endomembrane system; CONTAINS InterPro DOMAIN/s: Cytochrome P450 (InterPro:IPR001128), Cytoc…	169.98	68.4861	0.402907	-1.31148	1.02863e-13	1.04216e-11
LOC_Os11g06230	NB-ARC domain containing protein.			166.662	80.2195	0.48133	-1.0549	5.04279e-10	3.05174e-08
LOC_Os09g24954	Hypothetical conserved gene.	AT4G00420	Double-stranded RNA-binding domain (DsRBD)-containing protein \\ Double-stranded RNA-binding domain (DsRBD)-containing protein; FUNCTIONS IN: double-stranded RNA binding, RNA binding; INVOLVED IN: biological_process unknown; LOCATED IN: intracellular, chloroplast; EXPRESSED IN: 23 plant structures; EXPRESSED DURING: 13 growth stages; CONTAINS InterPro DOMAIN/s: Double-stranded RNA-binding (InterP…	159.367	70.1556	0.440213	-1.18373	3.19995e-08	1.36533e-06
LOC_Os01g60020	Similar to NAC domain protein.	NAC102	NAC domain containing protein 102 \\ Encodes a member of the NAC family of transcription factors. ANAC102 appears to have a role in mediating response to low oxygen stress (hypoxia) in germinating seedlings. \\ NAC domain containing protein 102 (NAC102); CONTAINS InterPro DOMAIN/s: No apical meristem (NAM) protein (InterPro:IPR003441); BEST Arabidopsis thaliana protein match is: NAC (No Apical Me…	158.316	59.8462	0.378017	-1.40348	0.000169508	0.00258476
LOC_Os12g40120	Transcriptional factor B3 domain containing protein.	AT4G33280	AP2/B3-like transcriptional factor family protein \\ AP2/B3-like transcriptional factor family protein; FUNCTIONS IN: DNA binding, sequence-specific DNA binding transcription factor activity; INVOLVED IN: regulation of transcription, DNA-dependent; LOCATED IN: vacuole; CONTAINS InterPro DOMAIN/s: Transcriptional factor B3 (InterPro:IPR003340); BEST Arabidopsis thaliana protein match is: AP2/B3-li…	153.455	71.5584	0.466314	-1.10063	7.94866e-10	4.66419e-08
LOC_Os11g06290	Conserved hypothetical protein.			138.353	68.7813	0.497142	-1.00827	5.30874e-08	2.18579e-06
LOC_Os04g44900	Similar to Lectin-like receptor kinase 7	RLK	receptor lectin kinase \\ Induced in response to Salicylic acid. \\ receptor lectin kinase (RLK); FUNCTIONS IN: kinase activity; INVOLVED IN: response to salicylic acid stimulus; LOCATED IN: plasma membrane; EXPRESSED IN: 23 plant structures; EXPRESSED DURING: 13 growth stages; CONTAINS InterPro DOMAIN/s: Legume lectin, beta chain (InterPro:IPR001220), Protein kinase, ATP binding site (InterPro:I…	131.94	63.7924	0.483496	-1.04842	0.000144336	0.0022582
LOC_Os05g09440	Similar to NADP-malic enzyme.	NADP-ME3	NADP-malic enzyme 3 \\ The malic enzyme (EC 1.1.1.40) encoded by the ATNADP-ME3 is presumably cytosolic and restricted in its expression by both developmental and cell-specific signals. \\ NADP-malic enzyme 3 (NADP-ME3); FUNCTIONS IN: malate dehydrogenase (oxaloacetate-decarboxylating) (NADP+) activity, oxidoreductase activity, acting on NADH or NADPH, NAD or NADP as acceptor, malic enzyme activi…	129.32	41.6405	0.321997	-1.63488	4.6175e-09	2.35675e-07
LOC_Os02g04690	Similar to Beta-amyrin synthase.	CAS1	cycloartenol synthase 1 \\ Involved in the biosynthesis of brassinosteroids. Catalyzes the reaction from epoxysqualene to cycloartenol. \\ cycloartenol synthase 1 (CAS1); FUNCTIONS IN: cycloartenol synthase activity; INVOLVED IN: pentacyclic triterpenoid biosynthetic process, thylakoid membrane organization, pollen development; LOCATED IN: vacuole; EXPRESSED IN: 24 plant structures; EXPRESSED DUR…	127.432	51.5479	0.404514	-1.30574	0.00214734	0.0202466
LOC_Os08g39210	EGF-type aspartate/asparagine hydroxylation site domain containing protein.	WAK3	wall associated kinase 3 \\ encodes a wall-associated kinase \\ wall associated kinase 3 (WAK3); FUNCTIONS IN: protein serine/threonine kinase activity, kinase activity; INVOLVED IN: protein amino acid phosphorylation; LOCATED IN: plasma membrane; EXPRESSED IN: 9 plant structures; EXPRESSED DURING: 9 growth stages; CONTAINS InterPro DOMAIN/s: EGF-like calcium-binding (InterPro:IPR001881), EGF-lik…	125.13	61.0898	0.488212	-1.03442	2.84479e-08	1.2215e-06
LOC_Os07g12730	Protein of unknown function DUF567 family protein.	AT5G01750	Protein of unknown function (DUF567) \\ Protein of unknown function (DUF567); FUNCTIONS IN: molecular_function unknown; INVOLVED IN: biological_process unknown; LOCATED IN: chloroplast; EXPRESSED IN: 23 plant structures; EXPRESSED DURING: 13 growth stages; CONTAINS InterPro DOMAIN/s: Protein of unknown function DUF567 (InterPro:IPR007612); BEST Arabidopsis thaliana protein match is: Protein of un…	119.66	55.3569	0.462617	-1.11211	4.13805e-05	0.000792203
LOC_Os08g04420	Serine/threonine protein kinase-related domain containing protein.	AT5G54590	Protein kinase superfamily protein \\ Protein kinase superfamily protein; FUNCTIONS IN: protein serine/threonine kinase activity, protein kinase activity, ATP binding; INVOLVED IN: protein amino acid phosphorylation; LOCATED IN: endomembrane system; EXPRESSED IN: 12 plant structures; EXPRESSED DURING: 7 growth stages; CONTAINS InterPro DOMAIN/s: Protein kinase, catalytic domain (InterPro:IPR00071…	117.576	56.6814	0.482082	-1.05265	2.25605e-05	0.000470534
LOC_Os07g37320	Similar to Monosaccharide transporter 3.	STP1	sugar transporter 1 \\ Encodes a H+/hexose cotransporter. \\ sugar transporter 1 (STP1); FUNCTIONS IN: carbohydrate transmembrane transporter activity, sugar:hydrogen symporter activity; INVOLVED IN: transport, transmembrane transport; LOCATED IN: nucleus, plasma membrane, vacuole, membrane; EXPRESSED IN: 25 plant structures; EXPRESSED DURING: 13 growth stages; CONTAINS InterPro DOMAIN/s: Sugar t…	116.525	43.3077	0.371659	-1.42795	6.08057e-11	4.26129e-09
LOC_Os02g35970	NPH3 domain containing protein.	NPH3	Phototropic-responsive NPH3 family protein \\ Involved in blue light response signaling pathway; interacts with the blue light photoreceptor NPH1.Null mutations abolish phototrophic responses of etiolated seedlings to low fluence blue light. Protein contains multiple protein-protein interaction domains. \\ NON-PHOTOTROPIC HYPOCOTYL 3 (NPH3); CONTAINS InterPro DOMAIN/s: NPH3 (InterPro:IPR004249), …	115.925	55.9966	0.483042	-1.04978	5.02211e-07	1.65418e-05
LOC_Os08g41550	Peptidase C19, ubiquitin carboxyl-terminal hydrolase 2 domain containing protein.	UBP1	ubiquitin-specific protease 1 \\ ubiquitin-specific protease 1 (UBP1); FUNCTIONS IN: ubiquitin-specific protease activity, ubiquitin thiolesterase activity, zinc ion binding; INVOLVED IN: ubiquitin-dependent protein catabolic process; LOCATED IN: cellular_component unknown; CONTAINS InterPro DOMAIN/s: Zinc finger, UBP-type (InterPro:IPR001607), Peptidase C19, ubiquitin carboxyl-terminal hydrolase…	112.019	29.2387	0.261015	-1.9378	4.3612e-10	2.66912e-08
LOC_Os03g42810	Similar to predicted protein.	5PTASE11	inositol polyphosphate 5-phosphatase 11 \\ Encodes a phosphatidylinositol polyphosphate 5-phosphatase. It can dephosphorylate PI(4,5)P2, PI(3,5)P2, and PI(3,4,5)P3, but, it is not active against PI(5)P or the water soluble inositol(1,4,5)P3 or inositol(1,3,4,5)P4. The transcript levels for this gene rise in response to auxin, ABA, and JA. \\ inositol polyphosphate 5-phosphatase 11 (5PTASE11); FUN…	105.374	51.7324	0.490939	-1.02638	4.27128e-07	1.43889e-05
LOC_Os07g06834	Protein of unknown function DUF3778 domain containing protein.			104.66	10.412	0.0994846	-3.32938	9.0809e-26	2.58576e-23
LOC_Os08g17060	Similar to GAG1At protein.	AT1G16000	unknown protein; BEST Arabidopsis thaliana protein match is: unknown protein (TAIR:AT1G80890.1); Has 41 Blast hits to 40 proteins in 10 species: Archae - 0; Bacteria - 0; Metazoa - 0; Fungi - 0; Plants - 41; Viruses - 0; Other Eukaryotes - 0 (source: NCBI BLink).	101.096	50.0124	0.494704	-1.01536	1.28527e-06	3.76271e-05
LOC_Os08g16120	NB-ARC domain containing protein.	RPM1	NB-ARC domain-containing disease resistance protein \\ Contains an N-terminal tripartite nucleotide binding site and a C-terminal tandem array of leucine-rich repeats. Confers resistance to Pseudomonas syringae strains that carry the avirulence genes avrB and avrRpm1. \\ RESISTANCE TO P. SYRINGAE PV MACULICOLA 1 (RPM1); FUNCTIONS IN: protein binding, nucleotide binding; INVOLVED IN: defense respo…	100.386	43.2726	0.431062	-1.21403	5.3269e-08	2.18994e-06
LOC_Os01g68260	Similar to lysine ketoglutarate reductase trans-splicing related 1.	AT1G67850	Protein of unknown function (DUF707) \\ Protein of unknown function (DUF707); CONTAINS InterPro DOMAIN/s: Protein of unknown function DUF707 (InterPro:IPR007877); BEST Arabidopsis thaliana protein match is: Protein of unknown function (DUF707) (TAIR:AT1G13000.2); Has 324 Blast hits to 323 proteins in 26 species: Archae - 0; Bacteria - 13; Metazoa - 0; Fungi - 0; Plants - 305; Viruses - 0; Other E…	98.8073	46.6495	0.472126	-1.08276	6.93946e-07	2.19812e-05
LOC_Os03g42130	Isopenicillin N synthase family protein.	AT3G19000	2-oxoglutarate (2OG) and Fe(II)-dependent oxygenase superfamily protein \\ 2-oxoglutarate (2OG) and Fe(II)-dependent oxygenase superfamily protein; FUNCTIONS IN: oxidoreductase activity, acting on paired donors, with incorporation or reduction of molecular oxygen, 2-oxoglutarate as one donor, and incorporation of one atom each of oxygen into both donors, oxidoreductase activity, iron ion binding;…	97.222	32.5578	0.334881	-1.57828	2.26232e-08	9.95088e-07
LOC_Os03g05920	Aromatic-ring hydroxylase family protein.	AT4G38540	FAD/NAD(P)-binding oxidoreductase family protein \\ FAD/NAD(P)-binding oxidoreductase family protein; FUNCTIONS IN: monooxygenase activity; INVOLVED IN: oxidation reduction; EXPRESSED IN: 15 plant structures; EXPRESSED DURING: 9 growth stages; CONTAINS InterPro DOMAIN/s: Monooxygenase, FAD-binding (InterPro:IPR002938); BEST Arabidopsis thaliana protein match is: FAD/NAD(P)-binding oxidoreductase …	93.4937	33.5402	0.358743	-1.47898	6.3766e-10	3.78275e-08
LOC_Os08g05810	Similar to DEAD-box ATP-dependent RNA helicase 45.	AT1G20920	P-loop containing nucleoside triphosphate hydrolases superfamily protein \\ P-loop containing nucleoside triphosphate hydrolases superfamily protein; FUNCTIONS IN: helicase activity, nucleic acid binding, ATP-dependent helicase activity, ATP binding; EXPRESSED IN: 25 plant structures; EXPRESSED DURING: 14 growth stages; CONTAINS InterPro DOMAIN/s: DNA/RNA helicase, DEAD/DEAH box type, N-terminal …	90.5418	38.2737	0.422718	-1.24223	8.28748e-07	2.56504e-05
LOC_Os01g59450	Cytochrome P450 domain containing protein.	ATCG00350.1	Photosystem I, PsaA/PsaB protein \\ Encodes psaA protein comprising the reaction center for photosystem I along with psaB protein; hydrophobic protein encoded by the chloroplast genome. \\ PSAA; FUNCTIONS IN: chlorophyll binding; INVOLVED IN: photosynthesis; LOCATED IN: in 6 components; EXPRESSED IN: 24 plant structures; EXPRESSED DURING: 13 growth stages; CONTAINS InterPro DOMAIN/s: Photosystem …	88.5859	31.8692	0.359755	-1.47491	1.55088e-09	8.63228e-08
LOC_Os08g02390	Nucleotide-binding, alpha-beta plait domain containing protein.	AT1G01080	RNA-binding (RRM/RBD/RNP motifs) family protein \\ RNA-binding (RRM/RBD/RNP motifs) family protein; FUNCTIONS IN: RNA binding, nucleotide binding, nucleic acid binding; INVOLVED IN: biological_process unknown; LOCATED IN: chloroplast stroma, nucleus, chloroplast, chloroplast envelope; EXPRESSED IN: 23 plant structures; EXPRESSED DURING: 13 growth stages; CONTAINS InterPro DOMAIN/s: RNA recognitio…	83.9257	37.5271	0.447147	-1.16118	9.2464e-07	2.83267e-05
LOC_Os04g52780	Protein kinase, core domain containing protein.	FLS2	Leucine-rich receptor-like protein kinase family protein \\ Encodes a leucine-rich repeat serine/threonine protein kinase that is expressed ubiquitously. FLS2 is involved in MAP kinase signalling relay involved in innate immunity. Essential in the perception of flagellin, a potent elicitor of the defense response. FLS2 is directed for degradation by the bacterial ubiquitin ligase AvrPtoB. \\ FLAG…	81.9673	26.2149	0.319822	-1.64466	2.18241e-10	1.41574e-08
LOC_Os03g30910	Similar to NB-ARC domain containing protein, expressed.	RPM1	NB-ARC domain-containing disease resistance protein \\ Contains an N-terminal tripartite nucleotide binding site and a C-terminal tandem array of leucine-rich repeats. Confers resistance to Pseudomonas syringae strains that carry the avirulence genes avrB and avrRpm1. \\ RESISTANCE TO P. SYRINGAE PV MACULICOLA 1 (RPM1); FUNCTIONS IN: protein binding, nucleotide binding; INVOLVED IN: defense respo…	81.6431	33.8922	0.415127	-1.26838	2.4669e-07	8.769e-06
LOC_Os02g37690	UDP-glucuronosyl/UDP-glucosyltransferase family protein.	AT5G65550	UDP-Glycosyltransferase superfamily protein \\ UDP-Glycosyltransferase superfamily protein; FUNCTIONS IN: transferase activity, transferring glycosyl groups; INVOLVED IN: metabolic process; CONTAINS InterPro DOMAIN/s: UDP-glucuronosyl/UDP-glucosyltransferase (InterPro:IPR002213); BEST Arabidopsis thaliana protein match is: UDP-Glycosyltransferase superfamily protein (TAIR:AT5G49690.1); Has 1807 B…	78.9556	35.6021	0.450912	-1.14908	0.000600325	0.00736814
LOC_Os01g66020	Similar to protein kinase.	AT1G11050	Protein kinase superfamily protein \\ Protein kinase superfamily protein; FUNCTIONS IN: kinase activity; INVOLVED IN: protein amino acid phosphorylation; LOCATED IN: endomembrane system; EXPRESSED IN: 18 plant structures; EXPRESSED DURING: 10 growth stages; CONTAINS InterPro DOMAIN/s: Protein kinase, ATP binding site (InterPro:IPR017441), Protein kinase, catalytic domain (InterPro:IPR000719), Ser…	72.1487	35.913	0.497764	-1.00647	0.00103656	0.0114589
LOC_Os07g05840	Conserved hypothetical protein.			71.7137	0.667928	0.00931382	-6.74641	1.73521e-13	1.70069e-11
LOC_Os07g35810	Similar to receptor-like protein kinase RK20-1.	CRK10	cysteine-rich RLK (RECEPTOR-like protein kinase) 10 \\ Encodes a receptor-like protein kinase. Naming convention from Chen et al 2003 (PMID 14756307) \\ cysteine-rich RLK (RECEPTOR-like protein kinase) 10 (CRK10); FUNCTIONS IN: protein serine/threonine kinase activity, protein kinase activity, kinase activity, ATP binding; INVOLVED IN: protein amino acid phosphorylation; LOCATED IN: plasma membra…	70.9547	1.34489	0.0189542	-5.72134	0.00275266	0.02464
LOC_Os07g33550	Similar to taxane 10-beta-hydroxylase.	CYP716A1	cytochrome P450, family 716, subfamily A, polypeptide 1 \\ member of CYP716A \\ cytochrome P450, family 716, subfamily A, polypeptide 1 (CYP716A1); FUNCTIONS IN: electron carrier activity, monooxygenase activity, iron ion binding, oxygen binding, heme binding; INVOLVED IN: oxidation reduction; LOCATED IN: endomembrane system; CONTAINS InterPro DOMAIN/s: Cytochrome P450 (InterPro:IPR001128), Cytoc…	70.8315	31.5622	0.445596	-1.16619	6.25518e-06	0.000152166
LOC_Os04g43680	Similar to OSIGBa0145M07.4 protein.	MYB15	myb domain protein 15 \\ Member of the R2R3 factor gene family. \\ myb domain protein 15 (MYB15); CONTAINS InterPro DOMAIN/s: SANT, DNA-binding (InterPro:IPR001005), Homeodomain-like (InterPro:IPR009057), Myb, DNA-binding (InterPro:IPR014778), HTH transcriptional regulator, Myb-type, DNA-binding (InterPro:IPR017930), Homeodomain-related (InterPro:IPR012287), Myb transcription factor (InterPro:IPR…	70.3352	19.4624	0.27671	-1.85355	0.00448159	0.0361561
LOC_Os04g36800	Similar to OSIGBa0140O07.8 protein.	KAS I	3-ketoacyl-acyl carrier protein synthase I \\ 3-ketoacyl-acyl carrier protein synthase I (KAS I) mRNA, \\ 3-ketoacyl-acyl carrier protein synthase I (KAS I); FUNCTIONS IN: transferase activity, transferring acyl groups other than amino-acyl groups, fatty acid synthase activity, catalytic activity; INVOLVED IN: biosynthetic process, metabolic process, fatty acid biosynthetic process; LOCATED IN: c…	66.2052	22.1588	0.334698	-1.57907	2.01507e-08	9.02477e-07
LOC_Os05g32380	Similar to predicted protein.	PLA-I{gamma}1	alpha/beta-Hydrolases superfamily protein \\ Encodes a lipase that hydrolyzes phosphatidylcholine, glycolipids as well as triacylglycerols. \\ alpha/beta-Hydrolases superfamily protein; FUNCTIONS IN: galactolipase activity, triglyceride lipase activity, phospholipase A1 activity; INVOLVED IN: lipid metabolic process; LOCATED IN: chloroplast; EXPRESSED IN: 8 plant structures; EXPRESSED DURING: 4 a…	65.8738	30.8465	0.468267	-1.0946	2.12497e-05	0.000446988
LOC_Os10g21540	Similar to UPF0496 protein 1.	AT4G34320	Protein of unknown function (DUF677) \\ Protein of unknown function (DUF677); FUNCTIONS IN: molecular_function unknown; INVOLVED IN: N-terminal protein myristoylation; LOCATED IN: cellular_component unknown; EXPRESSED IN: hypocotyl, sepal, flower, carpel, stamen; EXPRESSED DURING: 4 anthesis, petal differentiation and expansion stage; CONTAINS InterPro DOMAIN/s: Protein of unknown function DUF677…	64.8304	32.2057	0.496769	-1.00935	0.000126058	0.00201061
LOC_Os04g08460				64.2248	21.506	0.334855	-1.57839	1.68452e-08	7.67139e-07
LOC_Os01g35850	Rac-like GTP-binding protein 2.	ROP9	RHO-related protein from plants 9 \\ A member of ROP GTPase gene family. \\ RHO-related protein from plants 9 (ROP9); FUNCTIONS IN: GTP binding; INVOLVED IN: protein transport, small GTPase mediated signal transduction; LOCATED IN: plasma membrane; EXPRESSED IN: 16 plant structures; EXPRESSED DURING: 11 growth stages; CONTAINS InterPro DOMAIN/s: Ras GTPase (InterPro:IPR001806), Small GTP-binding …	62.2212	27.1822	0.436864	-1.19474	1.488e-05	0.000325927
LOC_Os08g41670	Uncharacterised protein family UPF0016 domain containing protein.	AT5G36290	Uncharacterized protein family (UPF0016) \\ Uncharacterized protein family (UPF0016); FUNCTIONS IN: molecular_function unknown; INVOLVED IN: biological_process unknown; LOCATED IN: endomembrane system, membrane; EXPRESSED IN: 23 plant structures; EXPRESSED DURING: 15 growth stages; CONTAINS InterPro DOMAIN/s: Uncharacterised protein family UPF0016 (InterPro:IPR001727); BEST Arabidopsis thaliana p…	61.8764	25.8384	0.41758	-1.25988	3.08011e-05	0.000615817
LOC_Os12g12854	Conserved hypothetical protein.			61.5845	25.5072	0.414183	-1.27166	4.6066e-06	0.000115169
LOC_Os08g34310	Hypothetical conserved gene.			61.2815	26.1802	0.427211	-1.22698	6.71639e-06	0.0001628
LOC_Os12g01449	Actin-binding FH2 domain containing protein.	CHUP1	Hydroxyproline-rich glycoprotein family protein \\ actin binding protein required for normal chloroplast positioning \\ CHLOROPLAST UNUSUAL POSITIONING 1 (CHUP1); INVOLVED IN: chloroplast relocation; LOCATED IN: chloroplast outer membrane, chloroplast; EXPRESSED IN: 22 plant structures; EXPRESSED DURING: 13 growth stages; BEST Arabidopsis thaliana protein match is: Tetratricopeptide repeat (TPR)-…	60.9102	28.509	0.46805	-1.09526	0.000111006	0.00180133
LOC_Os02g15760	Similar to DNA binding protein.	SPCH	basic helix-loop-helix (bHLH) DNA-binding superfamily protein \\ Encodes a basic helix-loop-helix (bHLH) transcription factor that is necessary and sufficient for the asymmetric divisions that establish the stomatal lineage in Arabidopsis thaliana. Expression of SPCH in young epidermal cells allows these cells to make asymmetric divisions. SPCH is a substrate of a kinase MPK3 and MPK6. \\ SPEECHL…	59.9674	24.1469	0.402667	-1.31234	0.0045413	0.0365142
LOC_Os04g04330	Protein kinase, core domain containing protein.	AT5G48940	Leucine-rich repeat transmembrane protein kinase family protein \\ Leucine-rich repeat transmembrane protein kinase family protein; FUNCTIONS IN: protein serine/threonine kinase activity, protein kinase activity, ATP binding; INVOLVED IN: transmembrane receptor protein tyrosine kinase signaling pathway, protein amino acid phosphorylation; EXPRESSED IN: root, cultured cell; CONTAINS InterPro DOMAI…	58.6196	20.4695	0.349192	-1.51791	4.13957e-07	1.39975e-05
LOC_Os12g03290	Similar to AP2 domain containing protein, expressed.	WRI1	Integrase-type DNA-binding superfamily protein \\ WRINKLED1 encodes transcription factor of the AP2/ERWEBP class. Protein has two plant-specific (AP2/EREB) DNA-binding domains and is involved in the control of storage compound biosynthesis in Arabidopsis. Mutants have wrinkled seed phenotype, due to a defect in the incorporation of sucrose and glucose into triacylglycerols. Transgenic sGsL plants…	57.2869	25.4814	0.444803	-1.16876	4.39177e-05	0.000833112
LOC_Os04g14340	Hypothetical conserved gene.	AT2G31080	transposable element gene \\ non-LTR retrotransposon family (LINE), has a 1.3e-49 P-value blast match to GB:NP_038603 L1 repeat, Tf subfamily, member 23 (LINE-element) (Mus musculus)	56.6717	13.0632	0.230506	-2.11712	6.47538e-08	2.59889e-06
LOC_Os01g53460	Similar to anthocyanidin 5,3-O-glucosyltransferase.	UGT88A1	UDP-glucosyl transferase 88A1 \\ UDP-glucosyl transferase 88A1 (UGT88A1); FUNCTIONS IN: in 6 functions; INVOLVED IN: metabolic process; LOCATED IN: cellular_component unknown; EXPRESSED IN: 22 plant structures; EXPRESSED DURING: 13 growth stages; CONTAINS InterPro DOMAIN/s: UDP-glucuronosyl/UDP-glucosyltransferase (InterPro:IPR002213); BEST Arabidopsis thaliana protein match is: UDP-glucosyl tran…	52.7056	25.5342	0.484469	-1.04552	0.000251117	0.00359798
LOC_Os01g08780	Endonuclease/exonuclease/phosphatase domain containing protein.	AT1G71710	DNAse I-like superfamily protein \\ DNAse I-like superfamily protein; FUNCTIONS IN: inositol-polyphosphate 5-phosphatase activity, inositol or phosphatidylinositol phosphatase activity; INVOLVED IN: biological_process unknown; EXPRESSED IN: 22 plant structures; EXPRESSED DURING: 13 growth stages; CONTAINS InterPro DOMAIN/s: Inositol polyphosphate related phosphatase (InterPro:IPR000300), Endonucl…	52.7023	24.1455	0.45815	-1.12611	0.000154031	0.00237825
LOC_Os07g12340	OsNAC3 protein.	NAC102	NAC domain containing protein 102 \\ Encodes a member of the NAC family of transcription factors. ANAC102 appears to have a role in mediating response to low oxygen stress (hypoxia) in germinating seedlings. \\ NAC domain containing protein 102 (NAC102); CONTAINS InterPro DOMAIN/s: No apical meristem (NAM) protein (InterPro:IPR003441); BEST Arabidopsis thaliana protein match is: NAC (No Apical Me…	49.3733	22.8588	0.462979	-1.11098	0.000274482	0.00388134
LOC_Os01g06130	Hypothetical conserved gene.	AT3G09110	Protein of unknown function (DUF674) \\ Protein of unknown function (DUF674); CONTAINS InterPro DOMAIN/s: Protein of unknown function DUF674 (InterPro:IPR007750); BEST Arabidopsis thaliana protein match is: Protein of unknown function (DUF674) (TAIR:AT5G01150.1); Has 327 Blast hits to 250 proteins in 14 species: Archae - 0; Bacteria - 0; Metazoa - 0; Fungi - 2; Plants - 325; Viruses - 0; Other Eu…	49.3621	20.1522	0.408252	-1.29247	2.17056e-05	0.000455514
LOC_Os07g47140	Zinc finger, B-box domain containing protein.	AT2G47890	B-box type zinc finger protein with CCT domain \\ B-box type zinc finger protein with CCT domain; FUNCTIONS IN: sequence-specific DNA binding transcription factor activity, zinc ion binding; INVOLVED IN: regulation of transcription; LOCATED IN: intracellular; EXPRESSED IN: stem, inflorescence meristem, root, flower, stamen; EXPRESSED DURING: 4 anthesis, petal differentiation and expansion stage; …	48.3982	14.4427	0.298413	-1.74462	7.42617e-07	2.3386e-05
LOC_Os09g24480	Similar to teosinte-branched one.	BRC1	TCP family transcription factor \\ Encodes a TCP transcription factor, closely related to teosinte branched1, arrests axillary bud development and prevents axillary bud outgrowth. \\ BRANCHED 1 (BRC1); CONTAINS InterPro DOMAIN/s: Transcription factor, TCP (InterPro:IPR005333), CYC/TB1, R domain (InterPro:IPR017888), Transcription factor TCP subgroup (InterPro:IPR017887); BEST Arabidopsis thaliana…	48.098	20.7815	0.432066	-1.21068	9.76625e-05	0.00162177
LOC_Os07g06070	Conserved hypothetical protein.			47.7522	23.1643	0.485095	-1.04366	0.000790333	0.00923511
LOC_Os11g03620	Conserved hypothetical protein.			47.412	18.4425	0.388984	-1.36222	2.22679e-05	0.000465151
LOC_Os02g05610	Zinc finger, C2H2-like domain containing protein.	SE	C2H2 zinc-finger protein SERRATE (SE) \\ Identified as a leaf form mutant by Redei having serrated leaves. Further analysis of the single loss of function allele indicated pleiotropic effects extending to many aspects of shoot development such as taller meristems, alterations in phase transition, phyllotaxy and branching. Encodes a single zinc finger containing protein that is expressed in merist…	47.1361	17.7565	0.376708	-1.40848	0.000205877	0.00305999
LOC_Os06g47760	Conserved hypothetical protein.	AT1G72300	Leucine-rich receptor-like protein kinase family protein \\ Encodes a leucine-rich repeat receptor kinase (LRR-RK) involved in the perception of PSY1. PSY1 is an 18-aa tyrosine-sulfated glycopeptide encoded by AT5G58650 that promotes cellular proliferation and expansion. \\ Leucine-rich receptor-like protein kinase family protein; CONTAINS InterPro DOMAIN/s: Protein kinase, ATP binding site (Inte…	47.0717	13.767	0.29247	-1.77364	4.5534e-07	1.51879e-05
LOC_Os03g13300	Similar to Glutamate decarboxylase isozyme 3 (EC 4.1.1.15).	GAD	glutamate decarboxylase \\ Encodes one of two isoforms of glutamate decarboxylase. \\ glutamate decarboxylase (GAD); FUNCTIONS IN: calmodulin binding, glutamate decarboxylase activity; INVOLVED IN: response to cadmium ion; EXPRESSED IN: 13 plant structures; EXPRESSED DURING: 6 growth stages; CONTAINS InterPro DOMAIN/s: Pyridoxal phosphate-dependent transferase, major domain (InterPro:IPR015424), …	47.0351	22.5119	0.478618	-1.06305	0.00108055	0.011864
LOC_Os07g38900	Conserved hypothetical protein.			46.7707	23.1787	0.495581	-1.01281	0.000675435	0.00807388
LOC_Os02g46730	Hypothetical conserved gene.	NHL8	NDR1/HIN1-like 8 \\ Encodes a protein whose sequence is similar to tobacco hairpin-induced gene (HIN1) and Arabidopsis non-race specific disease resistance gene (NDR1). Expression is not detected under normal conditions and in response to cucumber mosaic virus or spermine. \\ NDR1/HIN1-like 8 (NHL8); FUNCTIONS IN: zinc ion binding; INVOLVED IN: biological_process unknown; EXPRESSED IN: 22 plant s…	46.4364	17.131	0.368913	-1.43865	1.04131e-05	0.00023811
LOC_Os02g48770	SAM dependent carboxyl methyltransferase family protein.	BSMT1	S-adenosyl-L-methionine-dependent methyltransferases superfamily protein \\ The gene encodes a SABATH methyltransferase that methylates both salicylic acid and benzoic acid. It is highly expressed in flowers, induced by biotic and abiotic stress and thought to be involved in direct defense mechanism. \\ BSMT1; CONTAINS InterPro DOMAIN/s: SAM dependent carboxyl methyltransferase (InterPro:IPR00529…	45.7771	20.7983	0.454339	-1.13816	0.000439555	0.00574693
LOC_Os12g24040	Autophagy-related protein 1010 domain containing protein.	GH9B5	glycosyl hydrolase 9B5 \\ glycosyl hydrolase 9B5 (GH9B5); FUNCTIONS IN: hydrolase activity, hydrolyzing O-glycosyl compounds, catalytic activity; INVOLVED IN: carbohydrate metabolic process; LOCATED IN: endomembrane system; EXPRESSED IN: 18 plant structures; EXPRESSED DURING: 11 growth stages; CONTAINS InterPro DOMAIN/s: Six-hairpin glycosidase (InterPro:IPR012341), Glycoside hydrolase, family 9,…	45.4776	21.4727	0.472159	-1.08266	0.000798987	0.00931313
LOC_Os05g33130	Similar to Chitinase.	HCHIB	basic chitinase \\ encodes a basic chitinase involved in ethylene/jasmonic acid mediated signalling pathway during systemic acquired resistance based on expression analyses. \\ basic chitinase (HCHIB); FUNCTIONS IN: chitinase activity; INVOLVED IN: response to cadmium ion, defense response to fungus, jasmonic acid and ethylene-dependent systemic resistance, ethylene mediated signaling pathway; LO…	43.1499	20.7467	0.480805	-1.05648	0.0023161	0.0215228
LOC_Os03g18010	Similar to Phosphoinositide-specific phospholipase C.	AT2G40116	Phosphoinositide-specific phospholipase C family protein \\ Phosphoinositide-specific phospholipase C family protein; FUNCTIONS IN: phospholipase C activity, phosphoinositide phospholipase C activity, phosphoric diester hydrolase activity; INVOLVED IN: signal transduction, intracellular signaling pathway, lipid metabolic process; LOCATED IN: cellular_component unknown; CONTAINS InterPro DOMAIN/s:…	41.4975	5.04679	0.121617	-3.03959	2.55236e-12	2.17804e-10
LOC_Os12g21720				41.1923	17.4265	0.423052	-1.24109	0.000194492	0.00291156
LOC_Os09g37410	Similar to auxin induced protein.	AT5G27780	SAUR-like auxin-responsive protein family \\ SAUR-like auxin-responsive protein family ; CONTAINS InterPro DOMAIN/s: Auxin responsive SAUR protein (InterPro:IPR003676); BEST Arabidopsis thaliana protein match is: SAUR-like auxin-responsive protein family (TAIR:AT1G29430.1); Has 1807 Blast hits to 1807 proteins in 277 species: Archae - 0; Bacteria - 0; Metazoa - 736; Fungi - 347; Plants - 385; Vir…	41.1146	19.4481	0.473022	-1.08002	0.000775223	0.00908804
LOC_Os01g09460	Similar to Hexokinase.	HXK1	hexokinase 1 \\ Encodes a hexokinase (HXK1) in the plant glucose-signaling network. Functions as a glucose sensor to interrelate nutrient, light, and hormone signaling networks for controlling growth and development in response to the changing environment. \\ hexokinase 1 (HXK1); FUNCTIONS IN: fructokinase activity, hexokinase activity, glucokinase activity, zinc ion binding, ATP binding; INVOLVE…	40.4762	15.7734	0.389696	-1.35958	9.59708e-05	0.00159859
LOC_Os11g31850				39.2504	0.332666	0.00847549	-6.88249	3.76139e-06	9.67199e-05
LOC_Os04g51820	Ion transporter , Na transport	HKT1	high-affinity K+ transporter 1 \\ encodes a sodium transporter (HKT1) expressed in xylem parenchyma cells. Mutants over-accumulate sodium in shoot tissue and have increased sodium in the xylem sap and reduced sodium in phloem sap and roots. \\ high-affinity K+ transporter 1 (HKT1); CONTAINS InterPro DOMAIN/s: Potassium transport protein, high-affinity (InterPro:IPR004773), Cation transporter (Int…	38.2024	15.4368	0.40408	-1.30729	0.000280064	0.00394995
LOC_Os02g43550	PREG-like protein.	CYCP4;3	cyclin p4;3 \\ cyclin p4;3 (CYCP4;3); CONTAINS InterPro DOMAIN/s: Negative regulatory factor PREG (InterPro:IPR012389), Cyclin-like (InterPro:IPR011028), Cyclin-related 2 (InterPro:IPR013922), Cyclin (InterPro:IPR006670); BEST Arabidopsis thaliana protein match is: CYCLIN P4;2 (TAIR:AT5G61650.1); Has 1807 Blast hits to 1807 proteins in 277 species: Archae - 0; Bacteria - 0; Metazoa - 736; Fungi -…	38.1685	15.0836	0.395184	-1.3394	0.000233545	0.00339475
LOC_Os01g64110	Similar to Hevamine A precursor [Includes: Chitinase (EC 3.2.1.14)	CHIA	chitinase A \\ Chitinase A (class III) expressed exclusively under environmental stress conditions. \\ chitinase A (CHIA); FUNCTIONS IN: cation binding, hydrolase activity, hydrolyzing O-glycosyl compounds, catalytic activity; INVOLVED IN: response to salt stress, response to cold, cellular response to water deprivation, response to wounding, response to light intensity; LOCATED IN: endomembrane …	37.184	4.34408	0.116827	-3.09756	1.44481e-08	6.69238e-07
LOC_Os03g28270	Similar to Leucine Rich Repeat family protein, expressed.	AT1G74360	Leucine-rich repeat protein kinase family protein \\ Leucine-rich repeat protein kinase family protein; FUNCTIONS IN: protein serine/threonine kinase activity, protein kinase activity, ATP binding; INVOLVED IN: transmembrane receptor protein tyrosine kinase signaling pathway, protein amino acid phosphorylation; LOCATED IN: mitochondrion; EXPRESSED IN: 15 plant structures; EXPRESSED DURING: 9 grow…	36.2189	15.4253	0.42589	-1.23145	0.000371094	0.00499178
LOC_Os12g21730	Retrotransposon protein, putative, unclassified	AT4G06604	transposable element gene \\ gypsy-like retrotransposon family, has a 1.4e-248 P-value blast match to GB:AAD19359 polyprotein (gypsy_Ty3-element) (Sorghum bicolor)	36.2172	17.4523	0.48188	-1.05326	0.00173996	0.0172031
LOC_Os01g74110	Similar to Zinc transporter 2 precursor (ZRT/IRT-like protein 2).	ZIP2	ZRT/IRT-like protein 2 \\ encodes a metal ion transporter whose expression is regulated by copper. \\ ZRT/IRT-like protein 2 (ZIP2); FUNCTIONS IN: copper ion transmembrane transporter activity, zinc ion transmembrane transporter activity, transferase activity, transferring glycosyl groups; INVOLVED IN: zinc ion transport, response to copper ion; LOCATED IN: plasma membrane; EXPRESSED IN: 16 plant…	35.9476	9.41662	0.261954	-1.93261	0.000245569	0.00353157
LOC_Os07g46130	Similar to BLE2 protein.	AT5G18980	ARM repeat superfamily protein \\ ARM repeat superfamily protein; FUNCTIONS IN: binding; INVOLVED IN: biological_process unknown; LOCATED IN: cellular_component unknown; CONTAINS InterPro DOMAIN/s: Armadillo-like helical (InterPro:IPR011989), Armadillo (InterPro:IPR000225), Armadillo-type fold (InterPro:IPR016024); BEST Arabidopsis thaliana protein match is: ARM repeat superfamily protein (TAIR:A…	35.9174	16.7984	0.467696	-1.09636	0.00189736	0.0183699
LOC_Os12g08920	Similar to Peroxidase 43 precursor (EC 1.11.1.7) (Atperox P43).	AT4G25980	Peroxidase superfamily protein \\ Peroxidase superfamily protein; FUNCTIONS IN: peroxidase activity; INVOLVED IN: response to oxidative stress, oxidation reduction; LOCATED IN: endomembrane system; EXPRESSED IN: shoot apex, embryo, seed; EXPRESSED DURING: E expanded cotyledon stage, D bilateral stage; CONTAINS InterPro DOMAIN/s: Haem peroxidase (InterPro:IPR010255), Plant peroxidase (InterPro:IPR…	34.8868	13.7632	0.39451	-1.34187	0.000519363	0.00656202
LOC_Os06g46910	Zinc finger, C2H2-like domain containing protein.	AT5G54630	zinc finger protein-related \\ zinc finger protein-related; FUNCTIONS IN: sequence-specific DNA binding transcription factor activity; INVOLVED IN: regulation of transcription; LOCATED IN: intracellular; EXPRESSED IN: 21 plant structures; EXPRESSED DURING: 13 growth stages; CONTAINS InterPro DOMAIN/s: Zinc finger, C2H2-like (InterPro:IPR015880), Zinc finger, C2H2-type (InterPro:IPR007087); BEST A…	34.2792	5.3833	0.157043	-2.67077	1.09909e-08	5.24364e-07
LOC_Os12g05080	Protein of unknown function DUF231, plant domain containing protein.	TBL11	TRICHOME BIREFRINGENCE-LIKE 11 \\ Encodes a member of the TBL (TRICHOME BIREFRINGENCE-LIKE) gene family containing a plant-specific DUF231 (domain of unknown function) domain. TBL gene family has 46 members, two of which (TBR/AT5G06700 and TBL3/AT5G01360) have been shown to be involved in the synthesis and deposition of secondary wall cellulose, presumably by influencing the esterification state …	33.914	12.4273	0.366436	-1.44837	0.000112757	0.00182537
LOC_Os04g20880	Membrane bound O-acyl transferase, MBOAT family protein.	AT5G55350	MBOAT (membrane bound O-acyl transferase) family protein \\ MBOAT (membrane bound O-acyl transferase) family protein; CONTAINS InterPro DOMAIN/s: Wax synthase (InterPro:IPR017088); BEST Arabidopsis thaliana protein match is: MBOAT (membrane bound O-acyl transferase) family protein (TAIR:AT5G55360.1); Has 1807 Blast hits to 1807 proteins in 277 species: Archae - 0; Bacteria - 0; Metazoa - 736; Fun…	32.5976	15.4253	0.473203	-1.07947	0.00312821	0.0272708
LOC_Os01g50980	Cullin, N-terminal domain containing protein.	CUL1	cullin 1 \\ Encodes a cullin that is a component of SCF ubiquitin ligase complexes involved in mediating responses to auxin and jasmonic acid. Homozygous auxin-resistant mutants arrest growth soon after germination, lacking a root and hypocotyl. Heterozygotes display a variety of phenotypes consistent with impaired auxin response. \\ cullin 1 (CUL1); CONTAINS InterPro DOMAIN/s: Winged helix-turn-…	31.9459	14.083	0.440839	-1.18168	0.00145353	0.014996
LOC_Os05g39190	Domain of unknown function DUF1618 domain containing protein.			31.9324	15.4137	0.482699	-1.0508	0.00377558	0.0317381
LOC_Os07g04040	Similar to Resistance protein candidate (Fragment).	AT3G53810	Concanavalin A-like lectin protein kinase family protein \\ Concanavalin A-like lectin protein kinase family protein; FUNCTIONS IN: kinase activity; INVOLVED IN: protein amino acid phosphorylation; LOCATED IN: endomembrane system; EXPRESSED IN: 22 plant structures; EXPRESSED DURING: 11 growth stages; CONTAINS InterPro DOMAIN/s: Legume lectin, beta chain (InterPro:IPR001220), Protein kinase, ATP b…	31.6488	13.121	0.414582	-1.27027	0.000844088	0.00972877
LOC_Os03g07250	Cytochrome P450 protein, Anther cutin biosynthesis and pollen exine formation	CYP704B1	cytochrome P450, family 704, subfamily B, polypeptide 1 \\ Encodes a cytochrome P450, designated CYP704B1. Expressed in the developing anthers. Essential for pollen exine development. Mutations in CYP704B1 result in impaired pollen walls that lack a normal exine layer and exhibit a characteristic striped surface, termed zebra phenotype. Heterologous expression of CYP704B1 in yeast cells demonstra…	31.6185	10.0691	0.318455	-1.65084	6.57587e-05	0.00117029
LOC_Os04g23760		SD2-5	S-domain-2 5 \\ S-domain-2 5 (SD2-5); FUNCTIONS IN: carbohydrate binding, protein kinase activity, kinase activity; INVOLVED IN: protein amino acid autophosphorylation; LOCATED IN: plasma membrane; EXPRESSED IN: 25 plant structures; EXPRESSED DURING: 15 growth stages; CONTAINS InterPro DOMAIN/s: Curculin-like (mannose-binding) lectin (InterPro:IPR001480), Protein kinase, ATP binding site (InterPr…	31.2771	12.4068	0.396672	-1.33398	0.000458843	0.00595022
LOC_Os05g01120	Cytochrome P450 family protein.	CYP722A1	cytochrome P450, family 722, subfamily A, polypeptide 1 \\ member of CYP722A \\ cytochrome P450, family 722, subfamily A, polypeptide 1 (CYP722A1); FUNCTIONS IN: electron carrier activity, monooxygenase activity, iron ion binding, oxygen binding, heme binding; INVOLVED IN: oxidation reduction; LOCATED IN: endomembrane system; EXPRESSED IN: stem, flower; EXPRESSED DURING: petal differentiation and…	30.9375	11.0426	0.356931	-1.48628	0.000459678	0.0059582
LOC_Os12g37710	Zinc finger, CCHC-type domain containing protein.	emb1441	zinc knuckle (CCHC-type) family protein \\ embryo defective 1441 (emb1441); FUNCTIONS IN: zinc ion binding, nucleic acid binding; INVOLVED IN: embryo development ending in seed dormancy; LOCATED IN: cellular_component unknown; EXPRESSED IN: 24 plant structures; EXPRESSED DURING: 13 growth stages; CONTAINS InterPro DOMAIN/s: Fibronectin-binding A, N-terminal (InterPro:IPR008616), Protein of unknow…	30.6453	13.7362	0.448232	-1.15768	0.00416593	0.03417
LOC_Os06g45940	Similar to Potassium transporter 1 (AtPOT1) (AtKUP1) (AtKT1).	KT1	potassium transporter 1 \\ Encodes a high affinity potassium transporter. \\ potassium transporter 1 (KT1); CONTAINS InterPro DOMAIN/s: Potassium uptake protein, kup (InterPro:IPR018519), K+ potassium transporter (InterPro:IPR003855); BEST Arabidopsis thaliana protein match is: Potassium transporter family protein (TAIR:AT5G14880.1); Has 3625 Blast hits to 3386 proteins in 1031 species: Archae - …	30.6206	10.4301	0.340624	-1.55375	8.3475e-05	0.00142556
LOC_Os02g48370	AT-rich interaction region domain containing protein.	AT2G17410	ARID/BRIGHT DNA-binding domain-containing protein \\ ARID/BRIGHT DNA-binding domain-containing protein; FUNCTIONS IN: sequence-specific DNA binding transcription factor activity; INVOLVED IN: regulation of transcription; LOCATED IN: intracellular; EXPRESSED IN: 25 plant structures; EXPRESSED DURING: 13 growth stages; CONTAINS InterPro DOMAIN/s: Heat shock protein Hsp20 (InterPro:IPR002068), HSP20…	30.6206	11.4178	0.37288	-1.42322	0.000301873	0.00420926
LOC_Os06g28680				30.2827	14.7741	0.487871	-1.03543	0.00624869	0.0467072
LOC_Os03g50670	Os03g0714800	AT2G12210	transposable element gene \\ CACTA-like transposase family (Tnp2/En/Spm), has a 0. P-value blast match to gb|AAG52024.1|AC022456_5 Tam1-homologous transposon protein TNP2, putative; 12762-16371 (Arabidopsis thaliana) (CACTA-element)	29.3378	0.671771	0.0228978	-5.44865	0.00123711	0.0132273
LOC_Os12g18374	NB-ARC domain containing protein.	RPP13	NB-ARC domain-containing disease resistance protein \\ Confers resistance to the biotrophic oomycete, Peronospora parasitica. Encodes an NBS-LRR type R protein with a putative amino-terminal leucine zipper. Fungal protein ATR13 induces RPP13 gene expression and disease resistance. \\ RECOGNITION OF PERONOSPORA PARASITICA 13 (RPP13); FUNCTIONS IN: ATP binding; INVOLVED IN: defense response, incomp…	28.656	12.435	0.433941	-1.20443	0.0025118	0.0229162
LOC_Os05g13860	Similar to FIP1.			27.6675	9.06714	0.327718	-1.60947	0.000279208	0.00393994
LOC_Os07g05850		AT3G32021	transposable element gene \\ CACTA-like transposase family (En/Spm), has a 1.8e-154 P-value blast match to GB:AAA66266 unknown protein ORF1 transposable element En-1 (CACTA-element) (Zea mays)	27.6551	0.332666	0.0120291	-6.37733	1.31974e-11	1.02293e-09
LOC_Os10g03220	Transposase, putative, expressed	AT3G17450	hAT dimerisation domain-containing protein \\ hAT dimerisation domain-containing protein; FUNCTIONS IN: protein dimerization activity, DNA binding; INVOLVED IN: biological_process unknown; LOCATED IN: cellular_component unknown; EXPRESSED IN: 22 plant structures; EXPRESSED DURING: 14 growth stages; CONTAINS InterPro DOMAIN/s: HAT dimerisation (InterPro:IPR008906), Zinc finger, BED-type predicted …	27.3513	11.7465	0.429469	-1.21937	0.00362741	0.0308085
LOC_Os06g09230	Similar to Serine threonine kinase.	AT2G24370	Protein kinase protein with adenine nucleotide alpha hydrolases-like domain \\ Protein kinase protein with adenine nucleotide alpha hydrolases-like domain; FUNCTIONS IN: protein serine/threonine kinase activity, protein kinase activity, kinase activity, ATP binding; INVOLVED IN: protein amino acid phosphorylation, response to stress; LOCATED IN: cellular_component unknown; EXPRESSED IN: 6 plant s…	27.0238	11.7724	0.43563	-1.19883	0.00405037	0.0333536
LOC_Os06g18880	Hypothetical conserved gene.			26.648	11.0567	0.414916	-1.26911	0.00303701	0.0265871
LOC_Os08g39830	Similar to EIL3.	EIL3	ETHYLENE-INSENSITIVE3-like 3 \\ Encodes a putative transcription factor involved in ethylene signalling. Isolated DNA binding domain has been shown to bind DNA in vitro. \\ ETHYLENE-INSENSITIVE3-like 3 (EIL3); FUNCTIONS IN: DNA binding, sequence-specific DNA binding transcription factor activity; INVOLVED IN: ethylene mediated signaling pathway, cellular response to sulfate starvation, regulation…	26.0272	6.36583	0.244584	-2.0316	2.77414e-05	0.000561494
LOC_Os10g03230				26.0156	6.73453	0.258865	-1.94973	2.6818e-05	0.000546275
LOC_Os04g03980	Flavin monooxygenase-like enzyme, Auxin biosynthesis	YUC3	YUCCA 3 \\ YUCCA 3 (YUC3); FUNCTIONS IN: NADP or NADPH binding, oxidoreductase activity, FAD binding, flavin-containing monooxygenase activity; INVOLVED IN: auxin biosynthetic process; EXPRESSED IN: 11 plant structures; EXPRESSED DURING: 4 anthesis, C globular stage, petal differentiation and expansion stage, D bilateral stage; CONTAINS InterPro DOMAIN/s: Pyridine nucleotide-disulphide oxidoreduc…	26.0022	3.35761	0.129128	-2.95313	7.64743e-07	2.39434e-05
LOC_Os12g33300	Similar to Integral membrane protein DUF6 containing protein.	AT5G64700	nodulin MtN21 /EamA-like transporter family protein \\ nodulin MtN21 /EamA-like transporter family protein; FUNCTIONS IN: molecular_function unknown; LOCATED IN: membrane; EXPRESSED IN: 10 plant structures; EXPRESSED DURING: 4 anthesis, C globular stage, petal differentiation and expansion stage; CONTAINS InterPro DOMAIN/s: Protein of unknown function DUF6, transmembrane (InterPro:IPR000620); BES…	25.98	4.01785	0.154652	-2.6929	7.60776e-06	0.000181
LOC_Os08g41770				25.3585	11.0979	0.437641	-1.19218	0.00449072	0.036219
LOC_Os02g32180	Peptidase C65, otubain domain containing protein.			24.7143	7.0621	0.28575	-1.80717	7.49766e-05	0.00130767
LOC_Os12g03070	Similar to FHA domain containing protein, expressed.	AT2G21530	SMAD/FHA domain-containing protein \\ SMAD/FHA domain-containing protein ; INVOLVED IN: biological_process unknown; LOCATED IN: chloroplast thylakoid membrane, chloroplast stroma, chloroplast; EXPRESSED IN: guard cell; CONTAINS InterPro DOMAIN/s: SMAD/FHA domain (InterPro:IPR008984), Forkhead-associated (FHA) domain (InterPro:IPR000253); Has 459 Blast hits to 455 proteins in 163 species: Archae -…	24.6985	9.39212	0.380271	-1.3949	0.00219992	0.0206561
LOC_Os11g03700	Similar to YDG/SRA domain containing protein.	SUVH3	SU(VAR)3-9 homolog 3 \\ Encodes a SU(VAR)3-9 homolog, a SET domain protein. Known SET domain proteins are involved in epigenetic control of gene expression and act as histone methyltransferases. There are 10 SUVH genes in Arabidopsis and members of this subfamily of the SET proteins have an additional conserved SRA domain. \\ SU(VAR)3-9 homolog 3 (SUVH3); CONTAINS InterPro DOMAIN/s: SET domain (I…	24.6906	9.73891	0.394439	-1.34213	0.00149199	0.0153168
LOC_Os10g25230	Tify domain containing protein.			23.9661	0.667928	0.0278697	-5.16516	0.000864485	0.00992159
LOC_Os02g18630	Cyclin-like F-box domain containing protein.			23.7078	8.70487	0.367173	-1.44547	0.00236135	0.0219056
LOC_Os09g15480	Protein of unknown function DUF833 family protein.	AT4G38260	Protein of unknown function (DUF833) \\ Protein of unknown function (DUF833); FUNCTIONS IN: molecular_function unknown; INVOLVED IN: biological_process unknown; LOCATED IN: endomembrane system; EXPRESSED IN: 22 plant structures; EXPRESSED DURING: 15 growth stages; CONTAINS InterPro DOMAIN/s: Protein of unknown function DUF833 (InterPro:IPR008551); BEST Arabidopsis thaliana protein match is: Prote…	23.7031	8.71516	0.36768	-1.44348	0.00380628	0.0319166
LOC_Os02g12670	Similar to Protein kinase.	AT5G57035	U-box domain-containing protein kinase family protein \\ U-box domain-containing protein kinase family protein; FUNCTIONS IN: ubiquitin-protein ligase activity, protein serine/threonine kinase activity, protein kinase activity, kinase activity, ATP binding; INVOLVED IN: protein amino acid phosphorylation, protein ubiquitination, response to stress; LOCATED IN: ubiquitin ligase complex; CONTAINS I…	23.3687	9.06848	0.388061	-1.36564	0.00376268	0.031669
LOC_Os05g15150	Similar to predicted protein.	AT1G09620	ATP binding;leucine-tRNA ligases;aminoacyl-tRNA ligases;nucleotide binding;ATP binding;aminoacyl-tRNA ligases \\ ATP binding;leucine-tRNA ligases;aminoacyl-tRNA ligases;nucleotide binding;ATP binding;aminoacyl-tRNA ligases; FUNCTIONS IN: nucleotide binding, aminoacyl-tRNA ligase activity, leucine-tRNA ligase activity, ATP binding; INVOLVED IN: leucyl-tRNA aminoacylation, translation, tRNA aminoac…	22.3739	5.03516	0.225046	-2.15171	3.20297e-05	0.000632896
LOC_Os02g51910	UDP-glucuronosyl/UDP-glucosyltransferase domain containing protein.	UGT85A2	UDP-glucosyl transferase 85A2 \\ UDP-glucosyl transferase 85A2 (UGT85A2); FUNCTIONS IN: UDP-glycosyltransferase activity, transferase activity, transferring glycosyl groups, glucuronosyltransferase activity; INVOLVED IN: metabolic process; LOCATED IN: cellular_component unknown; EXPRESSED IN: 21 plant structures; EXPRESSED DURING: 11 growth stages; CONTAINS InterPro DOMAIN/s: UDP-glucuronosyl/UDP…	22.0405	6.39023	0.289931	-1.78622	0.000985418	0.0109879
LOC_Os03g39830	Conserved hypothetical protein.	AT4G13500	unknown protein; FUNCTIONS IN: molecular_function unknown; INVOLVED IN: biological_process unknown; LOCATED IN: chloroplast; BEST Arabidopsis thaliana protein match is: unknown protein (TAIR:AT2G05310.1); Has 50 Blast hits to 50 proteins in 20 species: Archae - 0; Bacteria - 0; Metazoa - 0; Fungi - 0; Plants - 50; Viruses - 0; Other Eukaryotes - 0 (source: NCBI BLink).	21.7255	8.70612	0.400732	-1.31929	0.00661777	0.0485349
LOC_Os12g38790	Similar to Targeting protein for Xklp2 containing protein, expressed.	AT5G15510	TPX2 (targeting protein for Xklp2) protein family \\ TPX2 (targeting protein for Xklp2) protein family; CONTAINS InterPro DOMAIN/s: Xklp2 targeting protein (InterPro:IPR009675); BEST Arabidopsis thaliana protein match is: TPX2 (targeting protein for Xklp2) protein family (TAIR:AT3G01015.1); Has 1184 Blast hits to 1000 proteins in 137 species: Archae - 0; Bacteria - 15; Metazoa - 507; Fungi - 52; …	21.7197	8.73187	0.402026	-1.31464	0.00521431	0.0407011
LOC_Os12g40390	Hypothetical conserved gene.			20.4126	5.71597	0.280021	-1.83639	0.000437899	0.0057336
LOC_Os11g35490		AT2G34930	disease resistance family protein / LRR family protein \\ disease resistance family protein / LRR family protein; INVOLVED IN: signal transduction, defense response to fungus, defense response; LOCATED IN: cell wall; EXPRESSED IN: 10 plant structures; EXPRESSED DURING: 7 growth stages; CONTAINS InterPro DOMAIN/s: Leucine-rich repeat-containing N-terminal domain, type 2 (InterPro:IPR013210), Leuci…	20.4021	7.03635	0.344883	-1.53582	0.00221485	0.0207746
LOC_Os01g61080	WRKY transcription factor 24 (WRKY24).	WRKY33	WRKY DNA-binding protein 33 \\ Member of the plant WRKY transcription factor family. Regulates the antagonistic relationship between defense pathways mediating responses to P. syringae and necrotrophic fungal pathogens. Located in nucleus. Involved in response to various abiotic stresses - especially salt stress. \\ WRKY DNA-binding protein 33 (WRKY33); CONTAINS InterPro DOMAIN/s: DNA-binding WRK…	20.07	2.68334	0.133699	-2.90294	2.82142e-05	0.000569143
LOC_Os06g46970	Similar to wound induced protein.			19.7217	7.38968	0.374698	-1.4162	0.00678945	0.0494112
LOC_Os01g60960	Similar to LOB domain protein 12.	LBD13	LOB domain-containing protein 13 \\ LOB domain-containing protein 13 (LBD13); FUNCTIONS IN: molecular_function unknown; INVOLVED IN: biological_process unknown; LOCATED IN: membrane; EXPRESSED IN: root, leaf; CONTAINS InterPro DOMAIN/s: Lateral organ boundaries, LOB (InterPro:IPR004883); BEST Arabidopsis thaliana protein match is: LOB domain-containing protein 15 (TAIR:AT2G40470.1); Has 7621 Blas…	18.7944	3.69027	0.19635	-2.3485	0.000976062	0.0109195
LOC_Os05g11630	Similar to Myb-like DNA-binding domain containing protein.			18.7677	7.03126	0.374647	-1.4164	0.00450146	0.0362624
LOC_Os09g35030	DRE-binding protein 1A.	CBF2	C-repeat/DRE binding factor 2 \\ Encodes a member of the DREB subfamily A-1 of ERF/AP2 transcription factor family (CBF2). The protein contains one AP2 domain. There are six members in this subfamily, including CBF1, CBF2, and CBF3. This gene is involved in response to low temperature, abscisic acid, and circadian rhythm. Overexpressing this gene leads to increased freeze tolerance and induces th…	18.7514	3.01206	0.160632	-2.63817	0.000101405	0.00167059
LOC_Os05g31760	Annexin family protein.	ANNAT3	annexin 3 \\ Annexins are calcium binding proteins that are localized in the cytoplasm. When cytosolic Ca2+ increases, they relocate to the plasma membrane. \\ annexin 3 (ANNAT3); FUNCTIONS IN: calcium-dependent phospholipid binding, calcium ion binding; INVOLVED IN: response to water deprivation, response to salt stress, response to cold, response to heat; LOCATED IN: vacuole, cell surface; EXPR…	18.4363	6.02548	0.326827	-1.6134	0.00251632	0.022942
LOC_Os03g16760	Similar to TA11 protein (Fragment).	PLL5	pol-like 5 \\ Encodes a protein phosphatase 2C like gene, similar to POL. Involved in leaf development. Knockout mutants have abnormally shaped leaves. \\ pol-like 5 (PLL5); FUNCTIONS IN: protein serine/threonine phosphatase activity, catalytic activity; INVOLVED IN: N-terminal protein myristoylation, leaf development; LOCATED IN: plasma membrane; EXPRESSED IN: 23 plant structures; EXPRESSED DURI…	17.4518	6.04095	0.34615	-1.53053	0.00561982	0.043101
LOC_Os07g32620	UDP-glucuronosyl/UDP-glucosyltransferase family protein.	UGT71B8	UDP-glucosyl transferase 71B8 \\ UDP-glucosyl transferase 71B8 (UGT71B8); FUNCTIONS IN: quercetin 3-O-glucosyltransferase activity, UDP-glycosyltransferase activity, transferase activity, transferring glycosyl groups, quercetin 4'-O-glucosyltransferase activity; INVOLVED IN: metabolic process; LOCATED IN: endomembrane system; CONTAINS InterPro DOMAIN/s: UDP-glucuronosyl/UDP-glucosyltransferase (I…	17.114	5.71212	0.33377	-1.58307	0.00392598	0.0326439
LOC_Os08g41610	Similar to Ubiquitin carboxyl-terminal hydrolase.	UBP2	ubiquitin-specific protease 2 \\ Encodes a ubiquitin-specific protease. \\ ubiquitin-specific protease 2 (UBP2); FUNCTIONS IN: ubiquitin-specific protease activity; INVOLVED IN: ubiquitin-dependent protein catabolic process; LOCATED IN: proteasome complex, chloroplast; EXPRESSED IN: 24 plant structures; EXPRESSED DURING: 13 growth stages; CONTAINS InterPro DOMAIN/s: Zinc finger, UBP-type (InterPr…	16.8053	5.72241	0.340513	-1.55422	0.0050655	0.0398334
LOC_Os07g11110	Similar to MRNA-binding protein (Fragment).	CSP41A	chloroplast stem-loop binding protein of 41 kDa \\ Encodes a protein with ribonuclease activity that is involved in plastid rRNA maturation. \\ chloroplast stem-loop binding protein of 41 kDa (CSP41A); FUNCTIONS IN: mRNA binding, poly(U) RNA binding; INVOLVED IN: rRNA processing; LOCATED IN: in 6 components; EXPRESSED IN: 25 plant structures; EXPRESSED DURING: 15 growth stages; CONTAINS InterPro …	16.8001	4.68837	0.279068	-1.84131	0.00230427	0.0214424
LOC_Os01g40170	Similar to Translation initiation factor.	AT1G76810	eukaryotic translation initiation factor 2 (eIF-2) family protein \\ eukaryotic translation initiation factor 2 (eIF-2) family protein; FUNCTIONS IN: translation factor activity, nucleic acid binding, GTP binding, GTPase activity; LOCATED IN: plasma membrane; EXPRESSED IN: 25 plant structures; EXPRESSED DURING: 15 growth stages; CONTAINS InterPro DOMAIN/s: Small GTP-binding protein (InterPro:IPR0…	16.7978	5.04544	0.300364	-1.73522	0.00295109	0.0260882
LOC_Os10g13430		AT1G40075	transposable element gene \\ CACTA-like transposase family (En/Spm), has a 4.1e-155 P-value blast match to GB:AAD55677 putative transposase protein (CACTA-element) transposon=Shooter (Zea mays)	16.7925	5.69925	0.339393	-1.55897	0.0043478	0.0353615
LOC_Os02g41670	Similar to Phenylalanine ammonia-lyase.	PAL1	PHE ammonia lyase 1 \\ Encodes PAL1, a phenylalanine ammonia-lyase. Arabidopsis has four PALs: AT2G37040 (PAL1), AT3G53260 (PAL2), AT5G04230 (PAL3) and AT3G10340 (PAL4). \\ PHE ammonia lyase 1 (PAL1); FUNCTIONS IN: phenylalanine ammonia-lyase activity; INVOLVED IN: in 10 processes; LOCATED IN: cytoplasm; EXPRESSED IN: 22 plant structures; EXPRESSED DURING: 13 growth stages; CONTAINS InterPro DOMA…	16.7802	1.01088	0.0602421	-4.05308	2.19797e-06	6.01187e-05
LOC_Os07g41630	Protein of unknown function DUF751 family protein.	AT4G16410	unknown protein; CONTAINS InterPro DOMAIN/s: Protein of unknown function DUF751 (InterPro:IPR008470); Has 30201 Blast hits to 17322 proteins in 780 species: Archae - 12; Bacteria - 1396; Metazoa - 17338; Fungi - 3422; Plants - 5037; Viruses - 0; Other Eukaryotes - 2996 (source: NCBI BLink).	16.4593	5.35755	0.325503	-1.61926	0.00600479	0.0453772
LOC_Os12g01900	Protein of unknown function DUF2985 domain containing protein.	AT5G05350	PLAC8 family protein \\ PLAC8 family protein; FUNCTIONS IN: molecular_function unknown; INVOLVED IN: biological_process unknown; LOCATED IN: chloroplast; EXPRESSED IN: 15 plant structures; EXPRESSED DURING: 6 growth stages; CONTAINS InterPro DOMAIN/s: Protein of unknown function Cys-rich (InterPro:IPR006461), Protein of unknown function DUF2985 (InterPro:IPR021369); BEST Arabidopsis thaliana prot…	16.4413	2.33126	0.141793	-2.81814	6.78616e-05	0.00120454
LOC_Os11g11960	NB-ARC domain containing protein.	RPM1	NB-ARC domain-containing disease resistance protein \\ Contains an N-terminal tripartite nucleotide binding site and a C-terminal tandem array of leucine-rich repeats. Confers resistance to Pseudomonas syringae strains that carry the avirulence genes avrB and avrRpm1. \\ RESISTANCE TO P. SYRINGAE PV MACULICOLA 1 (RPM1); FUNCTIONS IN: protein binding, nucleotide binding; INVOLVED IN: defense respo…	15.4591	3.01206	0.194841	-2.35963	0.00182285	0.0178207
LOC_Os05g36210				15.151	0	0	-20	4.10787e-07	1.391e-05
LOC_Os03g43410	Similar to IAA6 (Fragment).	SHY2	AUX/IAA transcriptional regulator family protein \\ SHY2/IAA3 regulates multiple auxin responses in roots. It is induced rapidly by IAA, and has been shown to be phosphorylated by oat phytochrome A in vitro. \\ SHORT HYPOCOTYL 2 (SHY2); FUNCTIONS IN: sequence-specific DNA binding transcription factor activity; INVOLVED IN: response to auxin stimulus, response to cyclopentenone, response to brassi…	13.838	2.35317	0.170051	-2.55596	0.000421473	0.00555076
LOC_Os01g59050	Similar to Cytochrome P450.	CYP94D2	cytochrome P450, family 94, subfamily D, polypeptide 2 \\ member of CYP94D \\ cytochrome P450, family 94, subfamily D, polypeptide 2 (CYP94D2); FUNCTIONS IN: electron carrier activity, monooxygenase activity, iron ion binding, oxygen binding, heme binding; INVOLVED IN: oxidation reduction; LOCATED IN: endomembrane system; EXPRESSED IN: 22 plant structures; EXPRESSED DURING: 12 growth stages; CONT…	13.516	2.68324	0.198523	-2.33262	0.000759862	0.00894086
LOC_Os06g09990	Non-protein coding transcript.			13.1857	2.35701	0.178756	-2.48394	0.00392919	0.0326439
LOC_Os01g43280	UDP-glucuronosyl/UDP-glucosyltransferase family protein.	UGT72B3	UDP-glucosyl transferase 72B3 \\ UDP-glucosyl transferase 72B3 (UGT72B3); FUNCTIONS IN: quercetin 3-O-glucosyltransferase activity, UDP-glycosyltransferase activity, transferase activity, transferring glycosyl groups; INVOLVED IN: metabolic process; LOCATED IN: cellular_component unknown; EXPRESSED IN: 11 plant structures; EXPRESSED DURING: LP.04 four leaves visible, petal differentiation and exp…	13.1565	2.35057	0.178662	-2.48469	0.00110753	0.0120854
LOC_Os05g36240	Conserved hypothetical protein.			12.8239	0	0	-20	0.000908106	0.0103042
LOC_Os09g11005	Similar to cDNA clone:001-102-C05, full insert sequence.			12.5239	1.00319	0.080102	-3.64202	0.000717386	0.00851514
LOC_Os06g51060	Similar to Chitinase 1.	HCHIB	basic chitinase \\ encodes a basic chitinase involved in ethylene/jasmonic acid mediated signalling pathway during systemic acquired resistance based on expression analyses. \\ basic chitinase (HCHIB); FUNCTIONS IN: chitinase activity; INVOLVED IN: response to cadmium ion, defense response to fungus, jasmonic acid and ethylene-dependent systemic resistance, ethylene mediated signaling pathway; LO…	12.5083	1.34998	0.107926	-3.21188	0.000495204	0.00630093
LOC_Os01g63210	SOUL haem-binding protein domain containing protein.	SOUL-1	SOUL heme-binding family protein \\ SOUL-1; FUNCTIONS IN: binding; INVOLVED IN: N-terminal protein myristoylation, red or far-red light signaling pathway; LOCATED IN: plasma membrane, vacuole; EXPRESSED IN: 25 plant structures; EXPRESSED DURING: 15 growth stages; CONTAINS InterPro DOMAIN/s: SOUL haem-binding protein (InterPro:IPR006917); BEST Arabidopsis thaliana protein match is: SOUL heme-bindi…	12.5048	2.35961	0.188696	-2.40586	0.00243248	0.022427
LOC_Os05g25860	Conserved hypothetical protein.			12.5001	2.67296	0.213836	-2.22543	0.00235199	0.0218263
LOC_Os05g51800	Similar to cDNA clone:J033067M13, full insert sequence.	AT5G19830	Peptidyl-tRNA hydrolase family protein \\ Peptidyl-tRNA hydrolase family protein; FUNCTIONS IN: aminoacyl-tRNA hydrolase activity; INVOLVED IN: translation; LOCATED IN: mitochondrion; EXPRESSED IN: 16 plant structures; EXPRESSED DURING: 8 growth stages; CONTAINS InterPro DOMAIN/s: Peptidyl-tRNA hydrolase, conserved site (InterPro:IPR018171), Peptidyl-tRNA hydrolase (InterPro:IPR001328); BEST Arab…	11.8524	2.34029	0.197453	-2.34042	0.00238173	0.0220494
LOC_Os03g14040	Heat shock protein DnaJ, cysteine-rich region domain containing protein.	AT1G75690	DnaJ/Hsp40 cysteine-rich domain superfamily protein \\ DnaJ/Hsp40 cysteine-rich domain superfamily protein; FUNCTIONS IN: unfolded protein binding, heat shock protein binding; INVOLVED IN: protein folding; LOCATED IN: chloroplast thylakoid membrane, chloroplast stroma, chloroplast; EXPRESSED IN: 23 plant structures; EXPRESSED DURING: 13 growth stages; CONTAINS InterPro DOMAIN/s: Heat shock protei…	11.8466	1.33845	0.112982	-3.14583	0.000384226	0.00514285
LOC_Os03g01930	Hypothetical conserved gene.	AT2G26570	Plant protein of unknown function (DUF827) \\ Encodes a coiled-coil protein WEB1 (weak chloroplast movement under blue light 1). WEB1, together with another coiled-coil protein WEB2/PMI2 (At1g66840), maintains the chloroplast photorelocation movement velocity. \\ Plant protein of unknown function (DUF827); FUNCTIONS IN: molecular_function unknown; INVOLVED IN: biological_process unknown; LOCATED …	11.5268	2.35192	0.204039	-2.29309	0.00250869	0.0229033
LOC_Os01g64890	Mg2 transporter protein, CorA-like domain containing protein.	MGT4	magnesium transporter 4 \\ Transmembrane magnesium transporter. One of nine family members. \\ magnesium transporter 4 (MGT4); FUNCTIONS IN: magnesium ion transmembrane transporter activity, metal ion transmembrane transporter activity; INVOLVED IN: transmembrane transport, metal ion transport; LOCATED IN: plasma membrane, membrane; EXPRESSED IN: 31 plant structures; EXPRESSED DURING: 13 growth s…	11.5221	2.34414	0.203447	-2.29728	0.00415246	0.0340905
LOC_Os03g42569	Similar to KANADI 3.			10.5471	2.01791	0.191323	-2.38592	0.00355273	0.030317
LOC_Os08g36040	Protein of unknown function DUF716 family protein.	AT1G49470	Family of unknown function (DUF716) \\ Family of unknown function (DUF716) ; FUNCTIONS IN: molecular_function unknown; INVOLVED IN: biological_process unknown; LOCATED IN: endomembrane system; EXPRESSED IN: 20 plant structures; EXPRESSED DURING: 10 growth stages; CONTAINS InterPro DOMAIN/s: Protein of unknown function DUF716 (InterPro:IPR006904); BEST Arabidopsis thaliana protein match is: Family…	8.56714	0.670523	0.0782669	-3.67545	0.00182732	0.0178258
LOC_Os11g41780		AT3G30680	transposable element gene \\ CACTA-like transposase family (Tnp2/En/Spm), has a 2.3e-152 P-value blast match to GB:CAA40555 TNP2 (CACTA-element) (Antirrhinum majus)	8.5625	0	0	-20	0.000220225	0.00323415
LOC_Os11g44680	Calmodulin binding protein-like family protein.	AT5G57580	Calmodulin-binding protein \\ Calmodulin-binding protein; CONTAINS InterPro DOMAIN/s: Calmodulin binding protein-like (InterPro:IPR012416); BEST Arabidopsis thaliana protein match is: Calmodulin-binding protein (TAIR:AT4G25800.2); Has 341 Blast hits to 322 proteins in 21 species: Archae - 0; Bacteria - 2; Metazoa - 0; Fungi - 0; Plants - 339; Viruses - 0; Other Eukaryotes - 0 (source: NCBI BLink).	8.55433	0.339105	0.0396413	-4.65685	0.000466628	0.00602997
LOC_Os03g08520	Protein of unknown function DUF581 family protein.	AT5G20700	Protein of unknown function (DUF581) \\ Protein of unknown function (DUF581); CONTAINS InterPro DOMAIN/s: Protein of unknown function DUF581 (InterPro:IPR007650); BEST Arabidopsis thaliana protein match is: Protein of unknown function (DUF581) (TAIR:AT1G74940.1); Has 476 Blast hits to 476 proteins in 20 species: Archae - 0; Bacteria - 0; Metazoa - 0; Fungi - 0; Plants - 476; Viruses - 0; Other Eu…	7.90725	0	0	-20	0.000152727	0.00236216
LOC_Os04g01690	Arginine decarboxylase (EC 4.1.1.19).	ADC1	arginine decarboxylase 1 \\ encodes a arginine decarboxylase (ADC), a rate-limiting enzyme that catalyzes the first step of polyamine (PA) biosynthesis via ADC pathway in Arabidopsis thaliana. Arabidopsis genome has two ADC paralogs, ADC1 and ADC2. Double mutant analysis showed that ADC genes are essential for the production of PA, and are required for normal seed development. Promoter region of …	7.59447	0	0	-20	0.00383717	0.0320764
LOC_Os10g11500	Similar to PR-1a pathogenesis related protein (Hv-1a) precursor.	PR1	pathogenesis-related gene 1 \\ PR1 gene expression is induced in response to a variety of pathogens. It is a useful molecular marker for the SAR response. Though the Genbank record for the cDNA associated to this gene is called 'PR-1-like', the sequence actually corresponds to PR1. Expression of this gene is salicylic-acid responsive. \\ pathogenesis-related gene 1 (PR1); FUNCTIONS IN: molecular_…	7.5916	0	0	-20	0.0012565	0.0133712
LOC_Os07g04980				7.23743	0.667928	0.092288	-3.43771	0.00394234	0.0327431
LOC_Os05g31090				6.92631	0.335262	0.0484041	-4.36873	0.00178389	0.0175605
LOC_Os11g41770	Hypothetical protein.			6.90942	0	0	-20	0.00151104	0.015442
LOC_Os06g05230		AT3G54823	transposable element gene \\ gypsy-like retrotransposon family, has a 4.4e-203 P-value blast match to GB:AAD22153 polyprotein (Gypsy_Ty3-element) (Sorghum bicolor)	6.58262	0	0	-20	0.00209733	0.019907
LOC_Os12g43620	Similar to Helix-loop-helix DNA-binding domain containing protein.	AT4G37850	basic helix-loop-helix (bHLH) DNA-binding superfamily protein \\ basic helix-loop-helix (bHLH) DNA-binding superfamily protein; FUNCTIONS IN: DNA binding, sequence-specific DNA binding transcription factor activity; INVOLVED IN: regulation of transcription; LOCATED IN: nucleus; CONTAINS InterPro DOMAIN/s: Helix-loop-helix DNA-binding domain (InterPro:IPR001092), Helix-loop-helix DNA-binding (Inte…	5.93322	0.332666	0.0560684	-4.15667	0.00502009	0.0395337
LOC_Os11g29710	Similar to MYND finger family protein, expressed.	AT1G67340	HCP-like superfamily protein with MYND-type zinc finger \\ HCP-like superfamily protein with MYND-type zinc finger; FUNCTIONS IN: binding, zinc ion binding; INVOLVED IN: biological_process unknown; LOCATED IN: nucleus; EXPRESSED IN: 23 plant structures; EXPRESSED DURING: 13 growth stages; CONTAINS InterPro DOMAIN/s: Zinc finger, MYND-type (InterPro:IPR002893), Tetratricopeptide-like helical (Inte…	5.60875	0	0	-20	0.00300532	0.0264208
LOC_Os02g33850	Protein synthesis factor, GTP-binding domain containing protein.	AT3G22980	Ribosomal protein S5/Elongation factor G/III/V family protein \\ Ribosomal protein S5/Elongation factor G/III/V family protein; FUNCTIONS IN: translation factor activity, nucleic acid binding, GTP binding, GTPase activity; INVOLVED IN: biological_process unknown; LOCATED IN: cellular_component unknown; EXPRESSED IN: 22 plant structures; EXPRESSED DURING: 14 growth stages; CONTAINS InterPro DOMAIN…	5.60698	0.335262	0.0597936	-4.06386	0.00611042	0.0459658
LOC_Os01g71670	Similar to Beta-1,3-glucanase precursor.	AT4G16260	Glycosyl hydrolase superfamily protein \\ Glycosyl hydrolase superfamily protein; FUNCTIONS IN: cation binding, hydrolase activity, hydrolyzing O-glycosyl compounds, catalytic activity; INVOLVED IN: defense response to fungus, incompatible interaction, response to salt stress; LOCATED IN: cell wall, plasma membrane; EXPRESSED IN: 11 plant structures; EXPRESSED DURING: LP.06 six leaves visible, LP…	4.95173	0	0	-20	0.00660024	0.0484382
LOC_Os05g31720	Similar to ABL164Cp.	AT3G07940	Calcium-dependent ARF-type GTPase activating protein family \\ Calcium-dependent ARF-type GTPase activating protein family; FUNCTIONS IN: ARF GTPase activator activity, zinc ion binding; INVOLVED IN: regulation of ARF GTPase activity; LOCATED IN: cellular_component unknown; EXPRESSED IN: 18 plant structures; EXPRESSED DURING: 11 growth stages; CONTAINS InterPro DOMAIN/s: Arf GTPase activating pro…	4.94356	0	0	-20	0.00276087	0.0247054
LOC_Os04g38770	Similar to MIKC-type MADS-box transcription factor WM30.	AGL21	AGAMOUS-like 21 \\ encodes a MADS box protein, highly expressed in the root. \\ AGAMOUS-like 21 (AGL21); FUNCTIONS IN: sequence-specific DNA binding transcription factor activity; INVOLVED IN: regulation of transcription, DNA-dependent; LOCATED IN: nucleus; EXPRESSED IN: 9 plant structures; EXPRESSED DURING: L mature pollen stage, M germinated pollen stage, C globular stage, E expanded cotyledon …	4.93484	0	0	-20	0.00299213	0.0263134
LOC_Os04g14320				4.6139	0	0	-20	0.00523805	0.040787
LOC_Os09g31502	NAD(P)-binding domain containing protein.	AT2G33590	NAD(P)-binding Rossmann-fold superfamily protein \\ NAD(P)-binding Rossmann-fold superfamily protein; FUNCTIONS IN: coenzyme binding, binding, cinnamoyl-CoA reductase activity, catalytic activity; INVOLVED IN: response to cadmium ion, lignin biosynthetic process; LOCATED IN: cellular_component unknown; EXPRESSED IN: 23 plant structures; EXPRESSED DURING: 13 growth stages; CONTAINS InterPro DOMAIN…	4.60628	0	0	-20	0.00531806	0.0412986
LOC_Os01g33960	Cytochrome P450 domain containing protein.	ATCG00350.1	Photosystem I, PsaA/PsaB protein \\ Encodes psaA protein comprising the reaction center for photosystem I along with psaB protein; hydrophobic protein encoded by the chloroplast genome. \\ PSAA; FUNCTIONS IN: chlorophyll binding; INVOLVED IN: photosynthesis; LOCATED IN: in 6 components; EXPRESSED IN: 24 plant structures; EXPRESSED DURING: 13 growth stages; CONTAINS InterPro DOMAIN/s: Photosystem …	4.2807	0	0	-20	0.00649837	0.0480293

## Sheet: Table S6
AccID	Description	Blast_Symbol	Blast_Description	WT_2mm	osvil2_2 mm	FoldChange	Log2FC	P-Value	FDR	WT_4 mm	osvil2_4mm	FoldChange	Log2FC	P-Value	FDR
LOC_Os02g54254	Similar to Lysine ketoglutarate reductase/saccharopine dehydrogenase.	AT4G33150	lysine-ketoglutarate reductase/saccharopine dehydrogenase bifunctional enzyme \\ lysine-ketoglutarate reductase/saccharopine dehydrogenase bifunctional enzyme; CONTAINS InterPro DOMAIN/s: Alanine dehydrogenase/PNT, C-terminal (InterPro:IPR007698), Saccharopine dehydrogenase / Homospermidine synthase (InterPro:IPR005097), Alanine dehydrogenase/PNT, N-terminal (InterPro:IPR007886), LOR/SDH bifuncti…	1501.07	3213.06	2.14051	1.09796	1.40609e-05	0.000310615	1625.46	3305.15	2.03337	1.02387	3.13287e-06	8.25191e-05
LOC_Os07g29330	Similar to kinase family protein.	AT4G35780	ACT-like protein tyrosine kinase family protein \\ ACT-like protein tyrosine kinase family protein; FUNCTIONS IN: protein serine/threonine/tyrosine kinase activity, protein kinase activity; INVOLVED IN: protein amino acid phosphorylation, metabolic process; EXPRESSED IN: 23 plant structures; EXPRESSED DURING: 13 growth stages; CONTAINS InterPro DOMAIN/s: Protein kinase, catalytic domain (InterPro…	651.898	2260.93	3.46822	1.7942	5.48043e-21	1.42486e-18	527.043	2216.82	4.20614	2.0725	1.51216e-35	8.02065e-33
LOC_Os11g38610	Tetratricopeptide-like helical domain containing protein.	AT3G47910	Ubiquitin carboxyl-terminal hydrolase-related protein \\ Ubiquitin carboxyl-terminal hydrolase-related protein; FUNCTIONS IN: ubiquitin thiolesterase activity, zinc ion binding; INVOLVED IN: ubiquitin-dependent protein catabolic process; LOCATED IN: intracellular; EXPRESSED IN: cultured cell; CONTAINS InterPro DOMAIN/s: Protein of unknown function DUF627 (InterPro:IPR006866), Peptidase C19, ubiqu…	958.99	2483.65	2.58987	1.37288	8.51348e-55	1.09617e-51	832.295	2155.26	2.58954	1.3727	5.8416e-70	9.87633e-67
LOC_Os06g22919	Concanavalin A-like lectin/glucanase domain containing protein.	XTH26	xyloglucan endotransglucosylase/hydrolase 26 \\ xyloglucan endotransglucosylase/hydrolase 26 (XTH26); FUNCTIONS IN: hydrolase activity, acting on glycosyl bonds, hydrolase activity, hydrolyzing O-glycosyl compounds, xyloglucan:xyloglucosyl transferase activity; INVOLVED IN: carbohydrate metabolic process, cellular glucan metabolic process; LOCATED IN: endomembrane system, apoplast, cell wall; EXP…	861.306	1831.98	2.12698	1.08881	6.17133e-10	4.2138e-08	748.907	1962.07	2.61991	1.38952	2.82696e-19	5.09813e-17
LOC_Os03g07750	Domain of unknown function DUF1618 domain containing protein.			377.672	1922.96	5.09163	2.34813	1.14455e-120	7.73687e-117	502.939	1916.09	3.80979	1.92971	3.55823e-117	1.92508e-113
LOC_Os11g31705	Conserved hypothetical protein.	HST	ARM repeat superfamily protein \\ Encodes member of importin/exportin family. Involved in timing of shoot maturation. Involved in miRNA transport. Mutants flower early and have small, curled leaves and reduced abundance of certain miRNA species. \\ HASTY (HST); CONTAINS InterPro DOMAIN/s: Exportin-1/Importin-beta-like (InterPro:IPR013598), Armadillo-type fold (InterPro:IPR016024); Has 520 Blast h…	657.663	1737.12	2.64135	1.40127	4.03075e-40	2.9456e-37	633.744	1624.18	2.56282	1.35773	5.28877e-49	5.10952e-46
LOC_Os03g01360	Conserved hypothetical protein.			269.793	1644.14	6.0941	2.60741	1.8442e-62	3.11659e-59	231.028	1597.89	6.91644	2.79003	2.90202e-94	6.54189e-91
LOC_Os03g47650	Ankyrin repeat domain containing protein.	AT3G04710	ankyrin repeat family protein \\ ankyrin repeat family protein; FUNCTIONS IN: binding; INVOLVED IN: biological_process unknown; LOCATED IN: cellular_component unknown; EXPRESSED IN: 22 plant structures; EXPRESSED DURING: 14 growth stages; CONTAINS InterPro DOMAIN/s: Tetratricopeptide-like helical (InterPro:IPR011990), Ankyrin repeat-containing domain (InterPro:IPR020683), Tetratricopeptide repeat…	487.385	1515.59	3.10963	1.63674	3.23422e-11	2.79393e-09	425.251	1366.22	3.21274	1.6838	3.2594e-15	4.10093e-13
LOC_Os10g01844	Non-protein coding transcript.			734.997	1570.98	2.13739	1.09585	1.75733e-10	1.34227e-08	548.7	1276.44	2.3263	1.21804	8.57207e-16	1.12565e-13
LOC_Os03g64340	Hypothetical conserved gene.	AT5G24580	Heavy metal transport/detoxification superfamily protein \\ Heavy metal transport/detoxification superfamily protein ; FUNCTIONS IN: copper ion binding, metal ion binding; INVOLVED IN: copper ion transport, metal ion transport; LOCATED IN: cellular_component unknown; EXPRESSED IN: 20 plant structures; EXPRESSED DURING: 13 growth stages; CONTAINS InterPro DOMAIN/s: Heavy metal transport/detoxifica…	516.746	1442.06	2.79065	1.4806	4.43913e-09	2.543e-07	450.602	1224.66	2.71783	1.44246	4.48788e-11	3.20321e-09
LOC_Os05g06814	Peptidase cysteine/serine, trypsin-like domain containing protein.			432.145	1149.39	2.65973	1.41128	6.52968e-44	5.69535e-41	505.302	1201.88	2.37854	1.25008	1.05247e-46	9.18395e-44
LOC_Os03g42350	Hypothetical conserved gene.	AT3G04710	ankyrin repeat family protein \\ ankyrin repeat family protein; FUNCTIONS IN: binding; INVOLVED IN: biological_process unknown; LOCATED IN: cellular_component unknown; EXPRESSED IN: 22 plant structures; EXPRESSED DURING: 14 growth stages; CONTAINS InterPro DOMAIN/s: Tetratricopeptide-like helical (InterPro:IPR011990), Ankyrin repeat-containing domain (InterPro:IPR020683), Tetratricopeptide repeat…	140.452	1167.62	8.31329	3.05542	1.69035e-138	1.52351e-134	91.6699	1139.3	12.4283	3.63555	3.91217e-234	1.05828e-229
LOC_Os08g43040	Transferase family protein.	HCT	hydroxycinnamoyl-CoA shikimate/quinate hydroxycinnamoyl transferase \\ At5g48930 has been shown to encode for the hydroxycinnamoyl-Coenzyme A shikimate/quinate hydroxycinnamoyltransferase (HCT) both synthesizing and catabolizing the hydroxycinnamoylesters (coumaroyl/caffeoyl shikimate and quinate) involved in the phenylpropanoid pathway. Influence on the accumulation of flavonoids which in turn i…	248.391	1112.99	4.48082	2.16376	1.33255e-72	2.57362e-69	316.738	1135.33	3.58445	1.84175	1.94749e-74	3.5121e-71
LOC_Os06g22380	Conserved hypothetical protein.	AT1G54430	transposable element gene \\ similar to unknown protein [Arabidopsis thaliana] (TAIR:AT3G13250.1); similar to unknown protein [Arabidopsis thaliana] (TAIR:AT3G30420.1); similar to AT hook motif-containing protein-related [Arabidopsis thaliana] (TAIR:AT3G42100.1); similar to AT hook motif-containing protein, putative [Oryza sativa (japonica cultivar-group)] (GB:ABA94947.1); similar to Protein of u…	513.741	1425.09	2.77395	1.47194	1.97487e-29	8.21517e-27	485.821	1089.19	2.24197	1.16476	1.77449e-24	4.52847e-22
LOC_Os03g01350	Non-protein coding transcript.			51.5353	949.682	18.4278	4.20381	4.53103e-175	1.22514e-170	53.9447	871.679	16.1588	4.01425	8.4532e-222	1.14334e-217
LOC_Os05g28210	Similar to Embryonic abundant protein 1.	GEA6	Stress induced protein \\ Encodes a group 1 LEA gene that is activated by direct binding of ABI5 to its promoter and is involved in response to ABA. Is required for normal seed development. Involved in regulating the timing of dessication tolerance and rate of water loss during seed maturation. \\ LATE EMBRYOGENESIS ABUNDANT 6 (GEA6); CONTAINS InterPro DOMAIN/s: Late embryogenesis abundant protei…	158.918	900.755	5.66807	2.50286	9.27731e-10	6.04456e-08	54.0085	864.423	16.0053	4.00048	2.66459e-26	7.83487e-24
LOC_Os05g32460	Similar to VQ motif family protein.			206.081	519.137	2.51909	1.3329	3.2614e-06	9.22437e-05	412.643	847.162	2.05301	1.03774	1.93567e-05	0.000411649
LOC_Os10g13830	Similar to PDR3 ABC transporter.	PDR3	pleiotropic drug resistance 3 \\ pleiotropic drug resistance 3 (PDR3); FUNCTIONS IN: ATPase activity, coupled to transmembrane movement of substances; INVOLVED IN: drug transmembrane transport; LOCATED IN: membrane; EXPRESSED IN: 10 plant structures; EXPRESSED DURING: L mature pollen stage, M germinated pollen stage, 4 anthesis, C globular stage, petal differentiation and expansion stage; CONTAIN…	137.074	823.115	6.0049	2.58614	2.00531e-88	6.02463e-85	139.597	784.568	5.62022	2.49063	1.916e-110	6.47872e-107
LOC_Os07g07530	Conserved hypothetical protein.			336.34	740.562	2.20182	1.1387	5.03161e-19	1.1061e-16	331.683	761.764	2.29666	1.19954	8.50283e-27	2.61375e-24
LOC_Os07g09814	Cyclin-like F-box domain containing protein.			84.5852	707.246	8.36134	3.06373	1.07753e-75	2.24117e-72	89.8665	686.054	7.63414	2.93247	6.64708e-96	1.7981e-92
LOC_Os11g11256	Putative uncharacterized protein			100.126	602.378	6.01623	2.58886	2.52364e-07	9.86079e-06	116.535	685.224	5.88	2.55582	1.80883e-09	9.94525e-08
LOC_Os02g29140	Ankyrin repeat domain containing protein.	AT3G04710	ankyrin repeat family protein \\ ankyrin repeat family protein; FUNCTIONS IN: binding; INVOLVED IN: biological_process unknown; LOCATED IN: cellular_component unknown; EXPRESSED IN: 22 plant structures; EXPRESSED DURING: 14 growth stages; CONTAINS InterPro DOMAIN/s: Tetratricopeptide-like helical (InterPro:IPR011990), Ankyrin repeat-containing domain (InterPro:IPR020683), Tetratricopeptide repeat…	296.473	825.076	2.78297	1.47663	6.36975e-26	2.49611e-23	248.503	671.432	2.7019	1.43398	7.94033e-31	3.11295e-28
LOC_Os09g37780	S-locus glycoprotein domain containing protein.	AT1G11330	S-locus lectin protein kinase family protein \\ S-locus lectin protein kinase family protein; FUNCTIONS IN: in 6 functions; INVOLVED IN: protein amino acid phosphorylation, recognition of pollen; LOCATED IN: plasma membrane; EXPRESSED IN: 23 plant structures; EXPRESSED DURING: 13 growth stages; CONTAINS InterPro DOMAIN/s: Curculin-like (mannose-binding) lectin (InterPro:IPR001480), PAN-2 domain (…	22.3577	760.883	34.0322	5.08883	1.0638e-141	1.4382e-137	9.55216	667.688	69.8992	6.1272	4.25029e-213	3.83249e-209
LOC_Os08g35760	Similar to Germin-like protein 1 precursor.	GER1	germin-like protein 1 \\ germin-like protein (GLP1) \\ germin-like protein 1 (GER1); INVOLVED IN: biological_process unknown; LOCATED IN: extracellular matrix; EXPRESSED IN: 23 plant structures; EXPRESSED DURING: 13 growth stages; CONTAINS InterPro DOMAIN/s: Cupin, RmlC-type (InterPro:IPR011051), Cupin 1 (InterPro:IPR006045), Germin (InterPro:IPR001929), RmlC-like jelly roll fold (InterPro:IPR014…	616.36	1278.52	2.07432	1.05264	1.45899e-06	4.62548e-05	295.713	664.951	2.24864	1.16905	2.39068e-09	1.28825e-07
LOC_Os11g38620	Domain of unknown function DUF629 domain containing protein.			150.666	664.091	4.40769	2.14002	8.61233e-61	1.36982e-57	124.861	639.184	5.11916	2.35591	3.58434e-92	7.45845e-89
LOC_Os04g52770	Similar to Long hypocotyl in far-red 1 (bHLH-like protein HFR1) (Reduced phytochrome signaling) (Basic helix-loop-helix FBI1 protein) (Basic helix-loop-helix protein 26) (bHLH26) (AtbHLH026) (Reduced sensitivity to far-red light).	PIL5	phytochrome interacting factor 3-like 5 \\ Encodes a novel Myc-related bHLH transcription factor that has transcriptional activation activity in the dark. It is a key negative regulator of phytochrome-mediated seed germination and acts by inhibiting chlorophyll biosynthesis, light-mediated suppression of hypocotyl elongation and far-red light-mediated suppression of seed germination, and promotin…	189.555	589.644	3.11067	1.63723	5.56578e-39	3.58317e-36	241.436	635.131	2.63064	1.39542	7.00936e-40	4.62464e-37
LOC_Os12g35490	Conserved hypothetical protein.			218.763	599.572	2.74074	1.45457	3.4768e-32	1.67874e-29	221.665	595.827	2.68796	1.42651	2.6512e-40	1.79294e-37
LOC_Os01g16250	Hypothetical protein.			330.559	664.559	2.01041	1.00749	8.85677e-08	3.86255e-06	206.455	551.211	2.66988	1.41678	6.9624e-17	1.01258e-14
LOC_Os02g51000	Hypothetical conserved gene.	AT4G27890	HSP20-like chaperones superfamily protein \\ HSP20-like chaperones superfamily protein; CONTAINS InterPro DOMAIN/s: CS-like domain (InterPro:IPR007052), HSP20-like chaperone (InterPro:IPR008978), CS domain (InterPro:IPR017447); BEST Arabidopsis thaliana protein match is: HSP20-like chaperones superfamily protein (TAIR:AT5G53400.1); Has 1077 Blast hits to 1040 proteins in 209 species: Archae - 0; …	81.1597	514.449	6.33872	2.66419	2.49985e-70	4.50622e-67	94.5929	535.651	5.6627	2.50149	1.45175e-87	2.8051e-84
LOC_Os03g29190	Similar to PDI-like protein.	AT1G60420	DC1 domain-containing protein \\ Reduce transmission through pollen. \\ DC1 domain-containing protein; FUNCTIONS IN: oxidoreductase activity, antioxidant activity; INVOLVED IN: response to cadmium ion, pollen tube growth, pollen tube guidance; LOCATED IN: cellular_component unknown; EXPRESSED IN: 25 plant structures; EXPRESSED DURING: 15 growth stages; CONTAINS InterPro DOMAIN/s: Thioredoxin fold…	201.226	601.659	2.98997	1.58013	1.43796e-12	1.50119e-10	158.769	530.686	3.3425	1.74093	7.69135e-19	1.34231e-16
LOC_Os08g41880	Similar to Diphosphonucleotide phosphatase 1 precursor.	PAP27	purple acid phosphatase 27 \\ purple acid phosphatase 27 (PAP27); FUNCTIONS IN: protein serine/threonine phosphatase activity, acid phosphatase activity; INVOLVED IN: biological_process unknown; LOCATED IN: endomembrane system; EXPRESSED IN: 24 plant structures; EXPRESSED DURING: 15 growth stages; CONTAINS InterPro DOMAIN/s: Purple acid phosphatase, N-terminal (InterPro:IPR015914), Metallophospho…	132.215	485.504	3.67209	1.8766	3.72804e-07	1.38465e-05	173.237	528.577	3.05117	1.60936	2.68677e-07	9.42669e-06
LOC_Os01g40120	Zinc finger, C2H2, LYAR-type domain containing protein.			35.4796	605.563	17.0679	4.09322	4.11554e-110	1.85467e-106	34.9089	520.68	14.9154	3.89873	6.59654e-135	4.46108e-131
LOC_Os01g42190	Heat shock protein DnaJ, N-terminal domain containing protein.	AT1G71000	Chaperone DnaJ-domain superfamily protein \\ Chaperone DnaJ-domain superfamily protein; FUNCTIONS IN: heat shock protein binding; INVOLVED IN: protein folding; LOCATED IN: cellular_component unknown; EXPRESSED IN: 7 plant structures; EXPRESSED DURING: 4 anthesis, petal differentiation and expansion stage; CONTAINS InterPro DOMAIN/s: Molecular chaperone, heat shock protein, Hsp40, DnaJ (InterPro:I…	238.582	539.301	2.26044	1.1766	8.2222e-08	3.64459e-06	94.1443	514.466	5.46465	2.45013	9.11927e-33	4.18111e-30
LOC_Os07g05290	Hypothetical protein.			42.7712	687.004	16.0623	4.00561	1.24333e-39	8.40457e-37	31.9541	495.363	15.5023	3.95441	3.30905e-51	3.72971e-48
LOC_Os09g28370	Nucleic acid-binding, OB-fold domain containing protein.	AT1G64410	transposable element gene \\ similar to unknown protein [Arabidopsis thaliana] (TAIR:AT1G52960.1); similar to helicase-related [Arabidopsis thaliana] (TAIR:AT3G43350.1); similar to AT hook motif-containing protein-related [Arabidopsis thaliana] (TAIR:AT3G42100.1); similar to hypothetical protein 31.t00030 [Brassica oleracea] (GB:ABD65117.1); contains InterPro domain Nucleic acid-binding, OB-fold,…	113.245	487.095	4.30126	2.10476	6.77868e-10	4.5937e-08	170.58	488.319	2.86269	1.51737	1.02276e-07	3.89125e-06
LOC_Os08g32360	Conserved hypothetical protein.			160.388	520.233	3.2436	1.6976	1.23577e-36	7.59411e-34	123.173	485.347	3.94035	1.97832	1.28144e-59	1.92579e-56
LOC_Os03g18130	Similar to Asparagine synthetase.	ASN2	asparagine synthetase 2 \\ Encodes asparagine synthetase (ASN2). \\ asparagine synthetase 2 (ASN2); FUNCTIONS IN: asparagine synthase (glutamine-hydrolyzing) activity; INVOLVED IN: asparagine biosynthetic process; EXPRESSED IN: 23 plant structures; EXPRESSED DURING: 13 growth stages; CONTAINS InterPro DOMAIN/s: Rossmann-like alpha/beta/alpha sandwich fold (InterPro:IPR014729), Asparagine synthase…	100.63	503.635	5.00484	2.32332	0.00176742	0.0160045	126.213	476.945	3.7789	1.91796	0.00193105	0.0186359
LOC_Os05g25950	Cyclin-related 2 domain containing protein.	AT3G05327	Cyclin family protein \\ Cyclin family protein; CONTAINS InterPro DOMAIN/s: Negative regulatory factor PREG (InterPro:IPR012389), Cyclin-like (InterPro:IPR011028), Cyclin-related 2 (InterPro:IPR013922); BEST Arabidopsis thaliana protein match is: cyclin p4;1 (TAIR:AT2G44740.1); Has 35333 Blast hits to 34131 proteins in 2444 species: Archae - 798; Bacteria - 22429; Metazoa - 974; Fungi - 991; Plan…	195.882	577.535	2.94838	1.55992	8.6022e-34	4.38858e-31	143.237	465.41	3.24924	1.7001	6.27517e-47	5.65832e-44
LOC_Os11g31715	Hypothetical protein.			83.6044	468.369	5.6022	2.48599	4.40326e-59	6.61443e-56	62.9013	461.408	7.33544	2.87488	8.50369e-96	2.09121e-92
LOC_Os08g32330	Conserved hypothetical protein.			237.187	498.118	2.1001	1.07046	2.14013e-17	3.90993e-15	198.021	456.938	2.30753	1.20635	2.32026e-26	7.0523e-24
LOC_Os05g09500	Similar to Hexokinase.	HXK1	hexokinase 1 \\ Encodes a hexokinase (HXK1) in the plant glucose-signaling network. Functions as a glucose sensor to interrelate nutrient, light, and hormone signaling networks for controlling growth and development in response to the changing environment. \\ hexokinase 1 (HXK1); FUNCTIONS IN: fructokinase activity, hexokinase activity, glucokinase activity, zinc ion binding, ATP binding; INVOLVE…	172.093	498.985	2.89951	1.53581	0.000335776	0.00431309	181.129	449.232	2.48018	1.31044	0.000356668	0.00482894
LOC_Os12g36880	Probenazole-inducible protein PBZ1.			206.586	632.548	3.06192	1.61443	0.000485232	0.00581827	172.901	442.589	2.55979	1.35602	0.000624882	0.00759716
LOC_Os03g01470	Hypothetical protein.			157.012	401.343	2.55613	1.35396	9.47135e-15	1.2678e-12	174.593	434.73	2.48995	1.31612	2.35085e-18	3.85411e-16
LOC_Os03g46040	PDZ/DHR/GLGF domain containing protein.			30.1435	386.57	12.8243	3.68081	7.33036e-85	1.65171e-81	117.653	417.091	3.54511	1.82583	2.06837e-45	1.74848e-42
LOC_Os02g10630	Similar to No pollen.	AT1G03370	C2 calcium/lipid-binding and GRAM domain containing protein \\ C2 calcium/lipid-binding and GRAM domain containing protein; CONTAINS InterPro DOMAIN/s: C2 membrane targeting protein (InterPro:IPR018029), C2 calcium/lipid-binding domain, CaLB (InterPro:IPR008973), GRAM (InterPro:IPR004182), C2 region (InterPro:IPR020477), C2 calcium-dependent membrane targeting (InterPro:IPR000008); BEST Arabidops…	175.455	405.327	2.31015	1.20799	0.000306501	0.0040211	203.718	411.134	2.01815	1.01303	0.000440254	0.00575329
LOC_Os01g34860	Conserved hypothetical protein.			3.88477	399.822	102.92	6.68538	2.12883e-34	1.10695e-31	7.92005	392.89	49.607	5.63247	4.71914e-42	3.54604e-39
LOC_Os03g01442	Hypothetical conserved gene.			53.9438	418.376	7.75578	2.95527	1.79159e-25	6.82295e-23	50.727	379.503	7.48128	2.90328	4.78479e-33	2.27076e-30
LOC_Os12g42810	Mov34/MPN/PAD-1 family protein.	CSN6A	COP9 signalosome subunit 6A \\ one of two genes encoding subunit 6 of COP9 signalosome complex. Protein contains a MPR1p and PAD1p N-terminal (MPN) domain at the N-terminal region and belongs to the Mov34 superfamily. Mutant and antisense expression result in a number of developmental defects and in ubiquitin/proteasome-mediated protein degradation. \\ COP9 signalosome subunit 6A (CSN6A); CONTAIN…	82.1593	457.95	5.57393	2.47869	2.72967e-21	7.16578e-19	56.9542	378.437	6.6446	2.73218	5.07126e-32	2.1775e-29
LOC_Os05g43970	Similar to heat- and acid-stable phosphoprotein.	AT5G46020	CONTAINS InterPro DOMAIN/s: Casein kinase substrate, phosphoprotein PP28 (InterPro:IPR019380); Has 30201 Blast hits to 17322 proteins in 780 species: Archae - 12; Bacteria - 1396; Metazoa - 17338; Fungi - 3422; Plants - 5037; Viruses - 0; Other Eukaryotes - 2996 (source: NCBI BLink).	203.165	487.299	2.39854	1.26216	2.37137e-09	1.43444e-07	176.818	375.513	2.12372	1.08659	5.76211e-09	2.89185e-07
LOC_Os09g37580	Hypothetical conserved gene.	AT3G47890	Ubiquitin carboxyl-terminal hydrolase-related protein \\ Ubiquitin carboxyl-terminal hydrolase-related protein; FUNCTIONS IN: ubiquitin thiolesterase activity, zinc ion binding; INVOLVED IN: ubiquitin-dependent protein catabolic process; LOCATED IN: intracellular; CONTAINS InterPro DOMAIN/s: Protein of unknown function DUF627 (InterPro:IPR006866), Peptidase C19, ubiquitin carboxyl-terminal hydrol…	146.795	455.344	3.1019	1.63315	3.55605e-31	1.57627e-28	132.03	363.252	2.75129	1.46011	4.7168e-31	1.87638e-28
LOC_Os08g32410	Conserved hypothetical protein.			97.7021	383.466	3.92485	1.97264	4.21206e-10	3.00501e-08	79.0687	359.922	4.55201	2.1865	2.13448e-15	2.73649e-13
LOC_Os02g29190	Ankyrin repeat domain containing protein.	AT3G04710	ankyrin repeat family protein \\ ankyrin repeat family protein; FUNCTIONS IN: binding; INVOLVED IN: biological_process unknown; LOCATED IN: cellular_component unknown; EXPRESSED IN: 22 plant structures; EXPRESSED DURING: 14 growth stages; CONTAINS InterPro DOMAIN/s: Tetratricopeptide-like helical (InterPro:IPR011990), Ankyrin repeat-containing domain (InterPro:IPR020683), Tetratricopeptide repeat…	123.47	364.824	2.95475	1.56304	1.98829e-15	2.90602e-13	111.401	352.326	3.16269	1.66115	6.82948e-22	1.47795e-19
LOC_Os01g59410	Similar to SigA binding protein.			60.7662	261.203	4.2985	2.10383	1.45563e-20	3.64433e-18	120.549	351.551	2.91626	1.54412	1.14775e-17	1.77416e-15
LOC_Os04g44500	GRAM domain containing protein.	AT5G08350	GRAM domain-containing protein / ABA-responsive protein-related \\ GRAM domain-containing protein / ABA-responsive protein-related; CONTAINS InterPro DOMAIN/s: GRAM (InterPro:IPR004182); BEST Arabidopsis thaliana protein match is: GRAM domain-containing protein / ABA-responsive protein-related (TAIR:AT5G23370.1); Has 358 Blast hits to 358 proteins in 24 species: Archae - 0; Bacteria - 0; Metazoa …	125.895	368.046	2.92343	1.54766	0.00106522	0.0107996	127.725	344.193	2.6948	1.43018	0.000432623	0.00567825
ChrSy.fgenesh.gene.6				151.645	336.979	2.22216	1.15196	5.01566e-11	4.19871e-09	120.269	309.184	2.57077	1.3622	5.33702e-18	8.49246e-16
LOC_Os11g41380		FRS5	FAR1-related sequence 5 \\ FAR1-related sequence 5 (FRS5); FUNCTIONS IN: zinc ion binding; INVOLVED IN: response to red or far red light; LOCATED IN: cellular_component unknown; EXPRESSED IN: 22 plant structures; EXPRESSED DURING: 13 growth stages; CONTAINS InterPro DOMAIN/s: MULE transposase, conserved domain (InterPro:IPR018289), Transcription factor, FAR1-related (InterPro:IPR004330), Zinc fin…	77.7716	370.596	4.76519	2.25253	1.26481e-34	6.70575e-32	91.548	304.3	3.32394	1.73289	1.61039e-28	5.65747e-26
LOC_Os12g35480	Domain of unknown function DUF1618 domain containing protein.			50.557	300.375	5.94133	2.57078	9.48928e-45	8.55269e-42	61.2606	300.943	4.91251	2.29646	8.83881e-51	9.56394e-48
LOC_Os11g31800				71.9525	292.24	4.06156	2.02203	8.71188e-17	1.51e-14	58.3357	299.882	5.14062	2.36194	3.16658e-28	1.09819e-25
LOC_Os01g49260	Protein of unknown function DUF1618 domain containing protein.			123.475	281.04	2.27608	1.18655	1.57879e-07	6.4855e-06	125.726	295.721	2.35211	1.23395	3.75397e-10	2.34524e-08
LOC_Os01g45670	Hypothetical conserved gene.			127.363	276.901	2.17411	1.12043	0.00124133	0.0121831	131.983	290.856	2.20373	1.13995	0.000152549	0.00236189
LOC_Os01g37350	Cytochrome P450 domain containing protein.	ATCG00350.1	Photosystem I, PsaA/PsaB protein \\ Encodes psaA protein comprising the reaction center for photosystem I along with psaB protein; hydrophobic protein encoded by the chloroplast genome. \\ PSAA; FUNCTIONS IN: chlorophyll binding; INVOLVED IN: photosynthesis; LOCATED IN: in 6 components; EXPRESSED IN: 24 plant structures; EXPRESSED DURING: 13 growth stages; CONTAINS InterPro DOMAIN/s: Photosystem …	137.061	294.116	2.14587	1.10156	0.00432247	0.0317424	124.658	278.685	2.2356	1.16066	0.000555528	0.00690579
LOC_Os04g53800	NAD(P)-binding domain containing protein.	BAN	NAD(P)-binding Rossmann-fold superfamily protein \\ Negative regulator of flavonoid biosynthesis, mutants accumulate flavonoid pigments in their seed coat, putative oxidoreductase. It is thought that a ternary complex composed of TT2, TT8 and TTG1 is necessary for correct expression of BAN in seed endothelium. \\ BANYULS (BAN); FUNCTIONS IN: oxidoreductase activity, anthocyanidin reductase activi…	93.3281	228.312	2.44634	1.29062	3.40361e-14	4.32067e-12	91.5282	268.538	2.93394	1.55284	7.1563e-26	2.08156e-23
LOC_Os08g20730	Similar to Peroxidase 40 precursor (EC 1.11.1.7) (Atperox P40).	AT4G16270	Peroxidase superfamily protein \\ Peroxidase superfamily protein; FUNCTIONS IN: peroxidase activity, heme binding; INVOLVED IN: oxidation reduction, response to oxidative stress; LOCATED IN: endomembrane system; EXPRESSED IN: 9 plant structures; EXPRESSED DURING: F mature embryo stage, petal differentiation and expansion stage, E expanded cotyledon stage, D bilateral stage; CONTAINS InterPro DOMA…	148.232	399.276	2.69359	1.42953	4.94069e-22	1.45208e-19	105.753	264.06	2.49695	1.32017	2.21739e-21	4.58702e-19
LOC_Os11g38630	Domain of unknown function DUF629 domain containing protein.	AT3G47890	Ubiquitin carboxyl-terminal hydrolase-related protein \\ Ubiquitin carboxyl-terminal hydrolase-related protein; FUNCTIONS IN: ubiquitin thiolesterase activity, zinc ion binding; INVOLVED IN: ubiquitin-dependent protein catabolic process; LOCATED IN: intracellular; CONTAINS InterPro DOMAIN/s: Protein of unknown function DUF627 (InterPro:IPR006866), Peptidase C19, ubiquitin carboxyl-terminal hydrol…	121.027	268.795	2.22095	1.15118	6.0581e-13	6.53644e-11	100.801	251.351	2.49354	1.31819	6.2354e-20	1.20481e-17
LOC_Os04g54759	Similar to OSIGBa0138H21-OSIGBa0138E01.10 protein.			49.0981	274.862	5.59822	2.48497	1.43299e-39	9.45042e-37	69.1165	247.76	3.58467	1.84184	3.17763e-32	1.40915e-29
LOC_Os05g26070	Similar to cDNA clone:J033051A05, full insert sequence.	AT3G05327	Cyclin family protein \\ Cyclin family protein; CONTAINS InterPro DOMAIN/s: Negative regulatory factor PREG (InterPro:IPR012389), Cyclin-like (InterPro:IPR011028), Cyclin-related 2 (InterPro:IPR013922); BEST Arabidopsis thaliana protein match is: cyclin p4;1 (TAIR:AT2G44740.1); Has 35333 Blast hits to 34131 proteins in 2444 species: Archae - 798; Bacteria - 22429; Metazoa - 974; Fungi - 991; Plan…	44.2362	305.443	6.90481	2.7876	9.30289e-48	9.67465e-45	29.3054	246.723	8.41901	3.07365	2.31321e-65	3.68086e-62
LOC_Os08g32400				65.1314	249.25	3.82688	1.93617	2.27626e-11	2.01796e-09	51.7155	232.243	4.49078	2.16697	2.15201e-17	3.27045e-15
LOC_Os07g35710		FRS5	FAR1-related sequence 5 \\ FAR1-related sequence 5 (FRS5); FUNCTIONS IN: zinc ion binding; INVOLVED IN: response to red or far red light; LOCATED IN: cellular_component unknown; EXPRESSED IN: 22 plant structures; EXPRESSED DURING: 13 growth stages; CONTAINS InterPro DOMAIN/s: MULE transposase, conserved domain (InterPro:IPR018289), Transcription factor, FAR1-related (InterPro:IPR004330), Zinc fin…	14.0952	224.786	15.9477	3.99527	1.38754e-41	1.10346e-38	16.1635	227.224	14.0578	3.8133	2.79755e-54	3.60365e-51
LOC_Os08g32390				58.314	246.041	4.21925	2.07699	1.58013e-05	0.000342075	43.1872	223.676	5.17922	2.37273	1.50545e-08	6.93763e-07
LOC_Os01g60730	Similar to RING-H2 finger protein ATL3C.	AT3G10910	RING/U-box superfamily protein \\ RING/U-box superfamily protein; FUNCTIONS IN: zinc ion binding; CONTAINS InterPro DOMAIN/s: Zinc finger, RING-type (InterPro:IPR001841), Zinc finger, C3HC4 RING-type (InterPro:IPR018957); BEST Arabidopsis thaliana protein match is: RING/U-box superfamily protein (TAIR:AT5G05280.1); Has 8963 Blast hits to 8935 proteins in 281 species: Archae - 0; Bacteria - 6; Met…	69.0112	175.209	2.53885	1.34417	2.06419e-11	1.84204e-09	85.3399	214.681	2.5156	1.3309	2.23927e-15	2.85729e-13
LOC_Os02g29090	Domain of unknown function DUF1618 domain containing protein.			0	270.268	Inf	20	7.94749e-88	2.14892e-84	0	208.404	Inf	20	2.05552e-105	6.1782e-102
LOC_Os08g39810	Similar to predicted protein.	AT3G20810	2-oxoglutarate (2OG) and Fe(II)-dependent oxygenase superfamily protein \\ 2-oxoglutarate (2OG) and Fe(II)-dependent oxygenase superfamily protein; CONTAINS InterPro DOMAIN/s: Transcription factor jumonji/aspartyl beta-hydroxylase (InterPro:IPR003347); BEST Arabidopsis thaliana protein match is: 2-oxoglutarate (2OG) and Fe(II)-dependent oxygenase superfamily protein (TAIR:AT5G19840.2); Has 1946 B…	61.2391	200.123	3.26789	1.70836	4.44786e-08	2.09522e-06	57.3236	207.362	3.61739	1.85495	7.66994e-12	6.13845e-10
LOC_Os06g34810	Hypothetical conserved gene.			56.3797	217.601	3.85956	1.94844	2.81252e-18	5.67521e-16	46.0793	204.629	4.4408	2.15082	4.27653e-27	1.32971e-24
LOC_Os08g32370	Non-protein coding transcript.			83.6019	247.139	2.95614	1.56372	9.30179e-19	2.01209e-16	69.1962	201.39	2.91041	1.54122	9.94799e-22	2.11892e-19
LOC_Os07g42200	Similar to Protein kinase APK1B, chloroplast precursor (EC 2.7.1.-).	AT2G05940	Protein kinase superfamily protein \\ Protein kinase superfamily protein; FUNCTIONS IN: protein serine/threonine kinase activity, protein kinase activity, kinase activity, ATP binding; INVOLVED IN: protein amino acid phosphorylation; LOCATED IN: cellular_component unknown; EXPRESSED IN: 22 plant structures; EXPRESSED DURING: 13 growth stages; CONTAINS InterPro DOMAIN/s: Protein kinase, catalytic …	91.3689	183.783	2.01144	1.00823	2.01849e-08	1.01635e-06	97.497	198.92	2.04027	1.02876	3.66791e-11	2.67441e-09
LOC_Os09g24870	Hypothetical conserved gene.			27.7163	226.303	8.16497	3.02945	1.8064e-41	1.39552e-38	19.7479	190.284	9.63565	3.26838	9.35105e-56	1.26478e-52
LOC_Os01g41290	Cyclin-like F-box domain containing protein.	AT1G13570	F-box/RNI-like superfamily protein \\ F-box/RNI-like superfamily protein; CONTAINS InterPro DOMAIN/s: F-box domain, cyclin-like (InterPro:IPR001810), FBD (InterPro:IPR013596), F-box domain, Skp2-like (InterPro:IPR022364), FBD-like (InterPro:IPR006566), Leucine-rich repeat 2 (InterPro:IPR013101); BEST Arabidopsis thaliana protein match is: F-box/RNI-like/FBD-like domains-containing protein (TAIR:A…	66.1085	201.279	3.04468	1.60629	2.42596e-10	1.81203e-08	82.3576	190.035	2.30743	1.20629	2.33605e-08	1.02419e-06
LOC_Os01g58910	Protein of unknown function DUF6, transmembrane domain containing protein.	AT5G07050	nodulin MtN21 /EamA-like transporter family protein \\ nodulin MtN21 /EamA-like transporter family protein; LOCATED IN: membrane; CONTAINS InterPro DOMAIN/s: Protein of unknown function DUF6, transmembrane (InterPro:IPR000620); BEST Arabidopsis thaliana protein match is: nodulin MtN21 /EamA-like transporter family protein (TAIR:AT2G40900.1); Has 30201 Blast hits to 17322 proteins in 780 species: …	48.116	141.011	2.93065	1.55122	1.5838e-07	6.48853e-06	52.9496	182.868	3.45363	1.78811	1.53397e-12	1.33857e-10
LOC_Os11g47140	Similar to Protein kinase domain containing protein, expressed.	WAK2	wall-associated kinase 2 \\ cytoplasmic serine/threonine protein kinase induced by salicylic acid. mutant plants exhibit a loss of cell expansion and dependence on sugars and salts for seedling growth, affecting the expression and activity of vacuolar invertase. \\ wall-associated kinase 2 (WAK2); FUNCTIONS IN: protein serine/threonine kinase activity, protein kinase activity, calcium ion binding…	91.3789	196.94	2.15521	1.10783	1.22447e-09	7.75371e-08	59.2375	178.49	3.01312	1.59126	1.5006e-20	2.98476e-18
LOC_Os11g40120				89.9088	201.74	2.24383	1.16597	1.13528e-10	9.05514e-09	79.3763	177.01	2.23001	1.15705	1.30137e-12	1.14297e-10
LOC_Os11g34880	Similar to NB-ARC domain containing protein, expressed.	RPM1	NB-ARC domain-containing disease resistance protein \\ Contains an N-terminal tripartite nucleotide binding site and a C-terminal tandem array of leucine-rich repeats. Confers resistance to Pseudomonas syringae strains that carry the avirulence genes avrB and avrRpm1. \\ RESISTANCE TO P. SYRINGAE PV MACULICOLA 1 (RPM1); FUNCTIONS IN: protein binding, nucleotide binding; INVOLVED IN: defense respo…	17.0104	139.5	8.20088	3.03578	5.49225e-30	2.35722e-27	29.983	176.198	5.87661	2.55498	5.16729e-36	2.85266e-33
LOC_Os01g19460	Hypothetical conserved gene.	AT3G30560	transposable element gene \\ similar to AT hook motif-containing protein-related [Arabidopsis thaliana] (TAIR:AT1G35940.1); similar to unknown protein [Arabidopsis thaliana] (TAIR:AT3G13250.1); similar to AT hook motif-containing protein-related [Arabidopsis thaliana] (TAIR:AT3G42100.1); similar to hypothetical protein 27.t00039 [Brassica oleracea] (GB:ABD65060.1); similar to hypothetical protein…	33.5328	173.565	5.17598	2.37183	1.42787e-09	8.87543e-08	45.7923	174	3.79976	1.92591	3.30859e-09	1.73451e-07
LOC_Os07g39520	Similar to MAP kinase-like protein.	AT5G55560	Protein kinase superfamily protein \\ Protein kinase superfamily protein; FUNCTIONS IN: protein kinase activity, kinase activity, ATP binding; INVOLVED IN: protein amino acid phosphorylation; LOCATED IN: cellular_component unknown; EXPRESSED IN: 15 plant structures; EXPRESSED DURING: 8 growth stages; CONTAINS InterPro DOMAIN/s: Protein kinase, catalytic domain (InterPro:IPR000719), Serine/threoni…	72.4255	212.747	2.93747	1.55457	7.67974e-12	7.44274e-10	59.5532	166.188	2.79058	1.48057	4.56539e-13	4.22939e-11
LOC_Os11g39990	Similar to Patatin-like protein 1.	PLA2A	phospholipase A 2A \\ Encodes a lipid acyl hydrolase with wide substrate specificity that accumulates upon infection by fungal and bacterial pathogens. Protein is localized in the cytoplasm in healthy leaves, and in membranes in infected cells. Plays a role in cell death and differentially affects the accumulation of oxylipins. Contributes to resistance to virus. \\ phospholipase A 2A (PLA2A); FU…	39.3706	112.513	2.85778	1.5149	5.61026e-09	3.12775e-07	59.6106	161.404	2.70763	1.43703	7.61309e-12	6.11103e-10
LOC_Os01g37360	Cytochrome P450 domain containing protein.	ATCG00350.1	Photosystem I, PsaA/PsaB protein \\ Encodes psaA protein comprising the reaction center for photosystem I along with psaB protein; hydrophobic protein encoded by the chloroplast genome. \\ PSAA; FUNCTIONS IN: chlorophyll binding; INVOLVED IN: photosynthesis; LOCATED IN: in 6 components; EXPRESSED IN: 24 plant structures; EXPRESSED DURING: 13 growth stages; CONTAINS InterPro DOMAIN/s: Photosystem …	67.5624	185.523	2.74596	1.45731	1.88426e-05	0.000396794	60.8357	159.14	2.61591	1.38731	3.09977e-06	8.17269e-05
LOC_Os11g10290	Similar to Receptor-like protein kinase.	AT2G19130	S-locus lectin protein kinase family protein \\ S-locus lectin protein kinase family protein; FUNCTIONS IN: protein serine/threonine kinase activity, sugar binding, protein kinase activity, ATP binding; INVOLVED IN: protein amino acid phosphorylation, recognition of pollen; LOCATED IN: endomembrane system; EXPRESSED IN: 19 plant structures; EXPRESSED DURING: 13 growth stages; CONTAINS InterPro DO…	72.4168	187.379	2.58751	1.37156	1.66433e-07	6.7876e-06	78.7323	157.944	2.00609	1.00438	1.03885e-05	0.000237749
LOC_Os12g41350	DNA-binding HORMA domain containing protein.	ASY1	DNA-binding HORMA family protein \\ meiotic asynaptic mutant 1 (ASY1). ASY1 protein is initially distributed as numerous foci throughout the chromatin. During early G2, the foci are juxtaposed to the nascent chromosome axes to form a continuous axis associated signal. \\ ASYNAPTIC 1 (ASY1); CONTAINS InterPro DOMAIN/s: SWIRM (InterPro:IPR007526), DNA-binding HORMA (InterPro:IPR003511); BEST Arabid…	22.8519	170.664	7.46827	2.90077	4.70268e-32	2.2308e-29	35.2234	152.441	4.32783	2.11364	2.49513e-26	7.49952e-24
LOC_Os02g29130	Similar to Ankyrin-like protein-like protein.	AT3G04710	ankyrin repeat family protein \\ ankyrin repeat family protein; FUNCTIONS IN: binding; INVOLVED IN: biological_process unknown; LOCATED IN: cellular_component unknown; EXPRESSED IN: 22 plant structures; EXPRESSED DURING: 14 growth stages; CONTAINS InterPro DOMAIN/s: Tetratricopeptide-like helical (InterPro:IPR011990), Ankyrin repeat-containing domain (InterPro:IPR020683), Tetratricopeptide repeat…	25.7608	151.618	5.88559	2.55719	2.20759e-06	6.58115e-05	24.7471	150.992	6.10142	2.60915	1.46606e-08	6.77923e-07
LOC_Os08g32340				34.5062	159.366	4.61848	2.20742	1.4139e-21	3.86167e-19	30.3266	148.766	4.90546	2.29439	6.73174e-29	2.39606e-26
LOC_Os04g30410	Conserved hypothetical protein.			21.8698	168.043	7.68377	2.94182	7.38416e-32	3.44242e-29	28.6535	148.06	5.16725	2.3694	4.61821e-30	1.78467e-27
LOC_Os02g29160	Tetratricopeptide-like helical domain containing protein.	AT3G04710	ankyrin repeat family protein \\ ankyrin repeat family protein; FUNCTIONS IN: binding; INVOLVED IN: biological_process unknown; LOCATED IN: cellular_component unknown; EXPRESSED IN: 22 plant structures; EXPRESSED DURING: 14 growth stages; CONTAINS InterPro DOMAIN/s: Tetratricopeptide-like helical (InterPro:IPR011990), Ankyrin repeat-containing domain (InterPro:IPR020683), Tetratricopeptide repeat…	51.5204	153.53	2.97998	1.5753	1.29355e-13	1.50405e-11	58.7007	147.259	2.50864	1.3269	3.50171e-13	3.28906e-11
LOC_Os01g07980	Cytochrome P450 domain containing protein.	ATCG00350.1	Photosystem I, PsaA/PsaB protein \\ Encodes psaA protein comprising the reaction center for photosystem I along with psaB protein; hydrophobic protein encoded by the chloroplast genome. \\ PSAA; FUNCTIONS IN: chlorophyll binding; INVOLVED IN: photosynthesis; LOCATED IN: in 6 components; EXPRESSED IN: 24 plant structures; EXPRESSED DURING: 13 growth stages; CONTAINS InterPro DOMAIN/s: Photosystem …	62.2025	131.286	2.11062	1.07767	3.13216e-07	1.18781e-05	63.8871	141.322	2.21206	1.14539	3.91372e-10	2.42821e-08
LOC_Os01g48900	Similar to Dynamin-related protein 1B (Dynamin-like protein B).	DL1	dynamin-like protein \\ Encodes a dynamin-like protein related to phragmoplastin. Mutations in this gene, in combination with mutation in ADL1E, result in defects in embryogenesis, cell plate formation and trichome branching. Also controls vascular patterning in combination with VAN3 and GNOM. DRP2B and DRP1A participate together in clathrin-coated vesicle formation during endocytosis. \\ dynamin…	28.6759	144.076	5.02429	2.32892	8.89611e-22	2.52491e-19	40.5148	140.986	3.47986	1.79903	1.74206e-19	3.20575e-17
LOC_Os02g05000	Protein of unknown function DUF1677, Oryza sativa family protein.			49.5811	160.266	3.23241	1.69261	2.72703e-15	3.92214e-13	53.685	140.367	2.61464	1.38661	1.10323e-13	1.10942e-11
LOC_Os11g14580	Retrotransposon protein, putative, Ty3-gypsy sub-class	AT3G29076	transposable element gene \\ gypsy-like retrotransposon family, has a 9.1e-318 P-value blast match to GB:AAD27547 polyprotein (Gypsy_Ty3-element) (Oryza sativa subsp. indica)	65.1352	198.499	3.04749	1.60762	1.28832e-06	4.15925e-05	49.3621	139.025	2.81642	1.49386	4.16235e-07	1.40569e-05
LOC_Os01g54270	Similar to Carotenoid cleavage dioxygenase.	CCD8	carotenoid cleavage dioxygenase 8 \\ Encodes a protein with similarity to carotenoid cleaving deoxygenases, the enzymes that cleave beta-carotene. Involved in the production of a graft transmissable signal to suppress axillary branching. Protein is localized to chloroplast stroma and expressed primarily in root tip. Mutants in the gene exhibit increased shoot branching, and light-dependent defect…	60.75	142.152	2.33996	1.22648	4.72298e-09	2.67724e-07	63.9144	138.949	2.17398	1.12034	8.1551e-10	4.77497e-08
LOC_Os11g31820	Conserved hypothetical protein.	HST	ARM repeat superfamily protein \\ Encodes member of importin/exportin family. Involved in timing of shoot maturation. Involved in miRNA transport. Mutants flower early and have small, curled leaves and reduced abundance of certain miRNA species. \\ HASTY (HST); CONTAINS InterPro DOMAIN/s: Exportin-1/Importin-beta-like (InterPro:IPR013598), Armadillo-type fold (InterPro:IPR016024); Has 520 Blast h…	14.1027	115.212	8.16946	3.03024	1.94125e-19	4.37411e-17	20.1056	135.549	6.74187	2.75315	1.97385e-24	4.99014e-22
LOC_Os02g56510	Phosphate (Pi) transporter, Root-to-shoot Pi transfer	PHO1	phosphate 1 \\ mutant is deficient in the transfer of phosphate from root epidermal and cortical cells to the xylem. encodes protein with the mainly hydrophilic N-terminal and the C-terminal containing 6 potential membrane-spanning domains. \\ phosphate 1 (PHO1); INVOLVED IN: cellular response to phosphate starvation, phosphate transport; LOCATED IN: integral to membrane; EXPRESSED IN: 13 plant s…	33.0536	68.6685	2.07749	1.05484	7.73752e-05	0.00131582	61.8359	135.184	2.18617	1.12841	1.98171e-08	8.8901e-07
LOC_Os07g13770	UDP-glucuronosyl/UDP-glucosyltransferase family protein.	UGT76C2	UDP-glucosyl transferase 76C2 \\ UDP-glucosyl transferase 76C2 (UGT76C2); FUNCTIONS IN: in 6 functions; INVOLVED IN: metabolic process; EXPRESSED IN: 17 plant structures; EXPRESSED DURING: 12 growth stages; CONTAINS InterPro DOMAIN/s: UDP-glucuronosyl/UDP-glucosyltransferase (InterPro:IPR002213); BEST Arabidopsis thaliana protein match is: UDP-Glycosyltransferase superfamily protein (TAIR:AT5G058…	41.7991	131.833	3.15397	1.65717	5.10529e-06	0.000134938	39.5016	134.534	3.40578	1.76799	2.15201e-08	9.5433e-07
LOC_Os04g14690	Dimethylaniline monooxygenase, N-oxide-forming domain containing protein.	FMO1	flavin-dependent monooxygenase 1 \\ FMO1 is required for full expression of TIR-NB-LRRconditioned resistance to avirulent pathogens and for basal resistance to invasive virulent pathogens. Functions in an EDS1-regulated but SA-independent mechanism that promotes resistance and cell death at pathogen infection sites. \\ flavin-dependent monooxygenase 1 (FMO1); FUNCTIONS IN: NADP or NADPH binding, …	25.2691	99.4022	3.93374	1.9759	1.05316e-09	6.78012e-08	24.3886	131.871	5.40709	2.43485	1.64762e-18	2.80313e-16
LOC_Os07g04370				29.1639	126.623	4.34178	2.11829	2.2352e-17	4.02917e-15	34.2885	130.241	3.79839	1.92539	5.52957e-20	1.07612e-17
LOC_Os08g14890				1.46007	144.22	98.7761	6.62609	5.58242e-40	3.97218e-37	3.95224	129.981	32.8878	5.03948	6.55273e-45	5.37146e-42
LOC_Os03g10740	Conserved hypothetical protein.			12.6364	155.94	12.3405	3.62533	3.49892e-36	2.01292e-33	10.8553	127.549	11.7499	3.55458	6.71385e-43	5.18904e-40
LOC_Os01g57854	Similar to Pectinesterase (EC 3.1.1.11) (Fragment).	PMEPCRA	methylesterase PCR A \\ methylesterase PCR A (PMEPCRA); FUNCTIONS IN: enzyme inhibitor activity, pectinesterase activity; INVOLVED IN: cell wall modification; LOCATED IN: cell wall, plasma membrane, plant-type cell wall; EXPRESSED IN: 25 plant structures; EXPRESSED DURING: 13 growth stages; CONTAINS InterPro DOMAIN/s: Pectinesterase, active site (InterPro:IPR018040), Pectin lyase fold/virulence f…	75.3506	177.416	2.35454	1.23545	6.29597e-07	2.21662e-05	36.5707	127.043	3.47391	1.79656	4.68036e-14	5.06434e-12
LOC_Os06g22925				51.5266	120.812	2.34465	1.22938	0.000103957	0.00168217	35.234	125.731	3.56846	1.8353	1.3723e-10	9.09853e-09
LOC_Os08g09450	Cyclin-like F-box domain containing protein.	AT4G05460	RNI-like superfamily protein \\ RNI-like superfamily protein; FUNCTIONS IN: ubiquitin-protein ligase activity; INVOLVED IN: ubiquitin-dependent protein catabolic process; LOCATED IN: chloroplast; EXPRESSED IN: 24 plant structures; EXPRESSED DURING: 15 growth stages; CONTAINS InterPro DOMAIN/s: F-box domain, cyclin-like (InterPro:IPR001810), Leucine-rich repeat (InterPro:IPR001611); BEST Arabidops…	21.3918	131.661	6.15472	2.62169	1.2482e-22	3.83525e-20	18.788	121.927	6.4896	2.69813	7.94448e-30	3.02685e-27
LOC_Os08g32380				14.094	114.518	8.1253	3.02242	6.54182e-24	2.26775e-21	10.8709	119.433	10.9865	3.45766	7.67344e-38	4.61276e-35
LOC_Os06g10750	Protein of unknown function DUF6 domain containing protein.	AT1G21890	nodulin MtN21 /EamA-like transporter family protein \\ nodulin MtN21 /EamA-like transporter family protein; LOCATED IN: membrane; EXPRESSED IN: inflorescence meristem, flower; EXPRESSED DURING: petal differentiation and expansion stage; CONTAINS InterPro DOMAIN/s: Protein of unknown function DUF6, transmembrane (InterPro:IPR000620); BEST Arabidopsis thaliana protein match is: nodulin MtN21 /EamA-…	17.0066	71.0015	4.17493	2.06175	2.61149e-11	2.28518e-09	21.7168	119.431	5.49947	2.45929	1.1055e-23	2.69414e-21
LOC_Os05g35780				17.4946	114.801	6.56206	2.71415	1.7593e-21	4.70988e-19	21.3922	117.758	5.50473	2.46067	2.86747e-25	7.75678e-23
LOC_Os06g19070	Conserved hypothetical protein.	CYP76C4	cytochrome P450, family 76, subfamily C, polypeptide 4 \\ member of CYP76C \\ cytochrome P450, family 76, subfamily C, polypeptide 4 (CYP76C4); FUNCTIONS IN: electron carrier activity, monooxygenase activity, iron ion binding, oxygen binding, heme binding; INVOLVED IN: oxidation reduction; EXPRESSED IN: stem, root, carpel; EXPRESSED DURING: 4 anthesis; CONTAINS InterPro DOMAIN/s: Cytochrome P450 …	35.9763	135.287	3.76045	1.91091	1.30402e-11	1.22429e-09	30.9137	117.521	3.80157	1.92659	1.85454e-14	2.14389e-12
LOC_Os11g35420	Ribosome-inactivating protein domain containing protein.			2.91639	144.857	49.6699	5.6343	1.14626e-31	5.25316e-29	4.29173	117.125	27.2908	4.77034	2.05964e-35	1.07145e-32
LOC_Os07g26660	Similar to Aquaporin PIP2-5.	PIP2B	plasma membrane intrinsic protein 2 \\ a member of the plasma membrane intrinsic protein subfamily PIP2. localizes to the plasma membrane and exhibits water transport activity in Xenopus oocyte. expressed specifically in the vascular bundles and protein level increases slightly during leaf dev \\ plasma membrane intrinsic protein 2 (PIP2B); FUNCTIONS IN: water channel activity; INVOLVED IN: respo…	55.4039	128.935	2.32719	1.21859	4.06967e-08	1.93732e-06	43.4485	115.806	2.66536	1.41433	3.58089e-12	2.98051e-10
LOC_Os10g30560	Similar to UDP-glucoronosyl and UDP-glucosyl transferase family protein, expressed.	AT2G36970	UDP-Glycosyltransferase superfamily protein \\ UDP-Glycosyltransferase superfamily protein; FUNCTIONS IN: UDP-glycosyltransferase activity, transferase activity, transferring glycosyl groups; INVOLVED IN: metabolic process; LOCATED IN: endomembrane system; EXPRESSED IN: 20 plant structures; EXPRESSED DURING: 13 growth stages; CONTAINS InterPro DOMAIN/s: UDP-glucuronosyl/UDP-glucosyltransferase (I…	58.3352	139.995	2.39983	1.26293	4.84994e-05	0.000889069	44.0993	113.026	2.563	1.35783	1.18126e-06	3.52306e-05
LOC_Os01g55200	Similar to Potassium channel (Fragment).	KAT1	potassium channel in Arabidopsis thaliana 1 \\ Encodes a potassium channel protein (KAT1). ABA triggers KAT1 endocytosis both in epidermal cells as well as guard cells. Upon removal of ABA, KAT1 is recycled back to the plasma membrane. KAT1 is localized within 0.50.6 &#956;m diameter microdomains at the plasma membrane surface. KAT1 belongs to the Shaker family K+ channel. This family includes fi…	20.9002	108.765	5.20404	2.37963	2.65336e-17	4.72001e-15	13.4949	111.466	8.25982	3.04611	2.66448e-31	1.07578e-28
LOC_Os05g06540	Hypothetical conserved gene.			48.6065	104.079	2.14125	1.09846	3.44995e-06	9.62132e-05	45.4601	107.457	2.36376	1.24108	2.75485e-09	1.46696e-07
LOC_Os03g20740				36.4517	106.132	2.91159	1.54181	4.45523e-09	2.54347e-07	37.5021	107.043	2.85433	1.51315	3.15401e-11	2.31217e-09
LOC_Os01g27449	Hypothetical gene.			44.7042	114.514	2.5616	1.35704	2.22685e-08	1.10683e-06	41.1387	106.33	2.58468	1.36998	2.15586e-10	1.40188e-08
LOC_Os07g06390	Conserved hypothetical protein.			23.3361	107.811	4.61994	2.20788	1.56755e-12	1.63019e-10	26.0278	106.14	4.07797	2.02785	2.27142e-14	2.59086e-12
LOC_Os01g74410	Similar to Myb factor protein.	MYB48	myb domain protein 48 \\ Encodes a putative transcription factor (MYB48) that functions to regulate flavonol biosynthesis primarily in cotyledons. \\ myb domain protein 48 (MYB48); FUNCTIONS IN: DNA binding, sequence-specific DNA binding transcription factor activity; INVOLVED IN: regulation of transcription, DNA-dependent, response to salicylic acid stimulus, regulation of transcription; LOCATED…	8.74417	93.6522	10.7102	3.42092	8.1224e-14	9.71777e-12	16.7639	100.935	6.02096	2.58999	2.8923e-13	2.75492e-11
LOC_Os12g40300	BTB/POZ fold domain containing protein.			23.3286	122.885	5.26758	2.39714	9.88216e-19	2.12067e-16	19.7724	98.7062	4.99213	2.31965	3.77389e-21	7.73391e-19
LOC_Os01g41260	FBD domain containing protein.	AT1G13570	F-box/RNI-like superfamily protein \\ F-box/RNI-like superfamily protein; CONTAINS InterPro DOMAIN/s: F-box domain, cyclin-like (InterPro:IPR001810), FBD (InterPro:IPR013596), F-box domain, Skp2-like (InterPro:IPR022364), FBD-like (InterPro:IPR006566), Leucine-rich repeat 2 (InterPro:IPR013101); BEST Arabidopsis thaliana protein match is: F-box/RNI-like/FBD-like domains-containing protein (TAIR:A…	26.245	107.085	4.0802	2.02864	1.64199e-07	6.7066e-06	20.1226	95.4487	4.74337	2.24591	7.04614e-11	4.89988e-09
LOC_Os10g02610				0	101.77	Inf	20	2.02643e-37	1.27425e-34	0	93.3036	Inf	20	2.65017e-49	2.65517e-46
LOC_Os08g09780	Conserved hypothetical protein.			34.4987	109.461	3.1729	1.6658	9.18334e-11	7.43438e-09	26.9854	91.961	3.4078	1.76884	7.00559e-14	7.37386e-12
LOC_Os03g40390	Conserved hypothetical protein.			9.72129	115.095	11.8395	3.56554	2.42754e-27	9.79676e-25	12.5194	91.9401	7.34383	2.87653	1.32603e-25	3.698e-23
LOC_Os05g11910	Similar to Esterase.	AT5G45910	GDSL-like Lipase/Acylhydrolase superfamily protein \\ GDSL-like Lipase/Acylhydrolase superfamily protein; FUNCTIONS IN: hydrolase activity, acting on ester bonds, carboxylesterase activity; INVOLVED IN: lipid metabolic process; LOCATED IN: endomembrane system; EXPRESSED IN: 9 plant structures; EXPRESSED DURING: 4 anthesis, C globular stage, D bilateral stage; CONTAINS InterPro DOMAIN/s: Lipase, G…	41.8028	105.045	2.51286	1.32933	6.31889e-08	2.8593e-06	45.4216	91.7017	2.0189	1.01357	2.66423e-06	7.13565e-05
LOC_Os03g01720	Conserved hypothetical protein.	AT5G04460	RING/U-box superfamily protein \\ RING/U-box superfamily protein; FUNCTIONS IN: zinc ion binding; INVOLVED IN: biological_process unknown; LOCATED IN: cellular_component unknown; EXPRESSED IN: 23 plant structures; EXPRESSED DURING: 12 growth stages; CONTAINS InterPro DOMAIN/s: Zinc finger, RING-type (InterPro:IPR001841); BEST Arabidopsis thaliana protein match is: Ring/U-Box superfamily protein (…	72.4105	163.676	2.26038	1.17657	1.53215e-08	7.86107e-07	42.8057	87.1983	2.03707	1.0265	8.07814e-07	2.51753e-05
LOC_Os08g15020	Similar to Blind.	MYB36	myb domain protein 36 \\ Encodes a putative transcription factor (MYB36). \\ myb domain protein 36 (MYB36); CONTAINS InterPro DOMAIN/s: SANT, DNA-binding (InterPro:IPR001005), Homeodomain-like (InterPro:IPR009057), Myb, DNA-binding (InterPro:IPR014778), HTH transcriptional regulator, Myb-type, DNA-binding (InterPro:IPR017930), Homeodomain-related (InterPro:IPR012287), Myb transcription factor (In…	54.9297	122.975	2.23876	1.1627	3.32627e-05	0.00064288	31.6085	86.2694	2.72931	1.44854	5.08001e-08	2.09893e-06
LOC_Os08g20440	Conserved hypothetical protein.			33.5328	105.061	3.13309	1.64759	1.15742e-08	6.12438e-07	36.537	85.3322	2.3355	1.22373	1.23963e-06	3.65443e-05
LOC_Os02g10110	Protein kinase, catalytic domain domain containing protein.	SRF8	STRUBBELIG-receptor family 8 \\ STRUBBELIG-receptor family 8 (SRF8); FUNCTIONS IN: protein serine/threonine kinase activity, protein kinase activity, kinase activity, ATP binding; INVOLVED IN: protein amino acid phosphorylation; LOCATED IN: plasma membrane; EXPRESSED IN: 22 plant structures; EXPRESSED DURING: 13 growth stages; CONTAINS InterPro DOMAIN/s: Serine/threonine-protein kinase domain (In…	17.9838	105.351	5.85813	2.55044	9.06119e-18	1.68969e-15	18.4782	84.5573	4.57605	2.1941	3.29639e-17	4.95392e-15
LOC_Os09g36960	Conserved hypothetical protein.			4.37271	67.9563	15.541	3.95801	2.59668e-13	2.93773e-11	1.97988	83.4614	42.1549	5.39763	1.9379e-25	5.29516e-23
LOC_Os07g36800	Similar to Light induced protein like.	AT4G22310	Uncharacterised protein family (UPF0041) \\ Uncharacterised protein family (UPF0041); INVOLVED IN: biological_process unknown; LOCATED IN: mitochondrion; EXPRESSED IN: 25 plant structures; EXPRESSED DURING: 15 growth stages; CONTAINS InterPro DOMAIN/s: Uncharacterised protein family UPF0041 (InterPro:IPR005336); BEST Arabidopsis thaliana protein match is: Uncharacterised protein family (UPF0041) …	42.7787	94.9137	2.21871	1.14972	6.12877e-06	0.000157077	31.5724	82.4943	2.61286	1.38563	4.3032e-09	2.20884e-07
LOC_Os11g17954	Homeodomain-like containing protein.	AT3G47680	DNA binding \\ DNA binding; BEST Arabidopsis thaliana protein match is: glutathione S-transferase THETA 3 (TAIR:AT5G41220.1); Has 545 Blast hits to 544 proteins in 20 species: Archae - 0; Bacteria - 1; Metazoa - 18; Fungi - 0; Plants - 496; Viruses - 0; Other Eukaryotes - 30 (source: NCBI BLink).	12.6402	93.618	7.40639	2.88877	1.26013e-18	2.68288e-16	14.4696	79.8316	5.51721	2.46394	1.2548e-18	2.16201e-16
LOC_Os10g03400	Similar to predicted protein.	SFH3	SEC14-like 3 \\ SEC14-like 3 (SFH3); FUNCTIONS IN: phosphatidylinositol transporter activity; INVOLVED IN: flower development, transport; LOCATED IN: intracellular; EXPRESSED IN: 25 plant structures; EXPRESSED DURING: 17 growth stages; CONTAINS InterPro DOMAIN/s: Cellular retinaldehyde-binding/triple function, C-terminal (InterPro:IPR001251), Cellular retinaldehyde-binding/triple function, N-term…	27.2196	79.788	2.93127	1.55153	4.95797e-08	2.31136e-06	34.6049	79.6419	2.30146	1.20255	5.32877e-07	1.74303e-05
LOC_Os09g25250		AT5G29646	transposable element gene \\ CACTA-like transposase family (Tnp2/En/Spm), has a 1.9e-233 P-value blast match to gb|AAG52024.1|AC022456_5 Tam1-homologous transposon protein TNP2, putative; 12762-16371 (Arabidopsis thaliana) (CACTA-element)	17.5058	66.6621	3.808	1.92903	1.95856e-07	7.82237e-06	21.4325	79.4501	3.70699	1.89025	8.20547e-10	4.79409e-08
LOC_Os12g35890	Similar to sarcosine oxidase.	AT2G24580	FAD-dependent oxidoreductase family protein \\ FAD-dependent oxidoreductase family protein; FUNCTIONS IN: sarcosine oxidase activity; INVOLVED IN: tetrahydrofolate metabolic process, oxidation reduction; LOCATED IN: cellular_component unknown; EXPRESSED IN: 23 plant structures; EXPRESSED DURING: 13 growth stages; CONTAINS InterPro DOMAIN/s: FAD dependent oxidoreductase (InterPro:IPR006076), Sarco…	27.2196	91.2525	3.35245	1.74522	7.63333e-05	0.00130384	19.4352	78.813	4.05517	2.01976	2.87643e-07	1.0066e-05
LOC_Os02g54100	Conserved hypothetical protein.			29.6581	77.7555	2.62173	1.39052	7.77608e-07	2.67276e-05	36.2469	77.1046	2.12721	1.08896	5.08135e-06	0.000126106
LOC_Os02g41860	Similar to cDNA clone:001-039-E03, full insert sequence.	PIP2B	plasma membrane intrinsic protein 2 \\ a member of the plasma membrane intrinsic protein subfamily PIP2. localizes to the plasma membrane and exhibits water transport activity in Xenopus oocyte. expressed specifically in the vascular bundles and protein level increases slightly during leaf dev \\ plasma membrane intrinsic protein 2 (PIP2B); FUNCTIONS IN: water channel activity; INVOLVED IN: respo…	36.9472	110.039	2.97829	1.57448	1.54781e-09	9.55505e-08	14.8085	75.8445	5.12169	2.35662	5.52703e-18	8.74338e-16
LOC_Os12g05320	Conserved hypothetical protein.			30.136	88.6425	2.94142	1.55651	1.18443e-06	3.86156e-05	24.0293	75.2667	3.13228	1.64722	1.31608e-08	6.15941e-07
LOC_Os11g09600	Os11g0201600	AT5G03100	F-box/RNI-like superfamily protein \\ F-box/RNI-like superfamily protein; CONTAINS InterPro DOMAIN/s: F-box domain, cyclin-like (InterPro:IPR001810), F-box domain, Skp2-like (InterPro:IPR022364); BEST Arabidopsis thaliana protein match is: F-box/RNI-like superfamily protein (TAIR:AT3G28410.1); Has 2060 Blast hits to 2032 proteins in 28 species: Archae - 0; Bacteria - 0; Metazoa - 7; Fungi - 0; Pl…	3.88852	106.719	27.4446	4.77845	2.29664e-31	1.03498e-28	2.96601	74.4972	25.117	4.65059	5.70258e-34	2.80474e-31
LOC_Os07g02260	Hypothetical conserved gene.			6.31822	100.228	15.8634	3.98763	0.000596563	0.0068802	7.56997	72.4206	9.56683	3.25804	0.000481869	0.00619242
LOC_Os01g08020	Bicarbonate transporter, eukaryotic domain containing protein.	BOR4	HCO3- transporter family \\ Encodes a efflux-type boron transporter. Over-expression improved plant growth under B toxic conditions. \\ REQUIRES HIGH BORON 4 (BOR4); CONTAINS InterPro DOMAIN/s: Bicarbonate transporter, eukaryotic (InterPro:IPR003020), Bicarbonate transporter, C-terminal (InterPro:IPR011531); BEST Arabidopsis thaliana protein match is: HCO3- transporter family (TAIR:AT1G74810.1); …	26.2537	77.7563	2.96172	1.56644	7.16696e-08	3.19781e-06	33.2408	71.1254	2.1397	1.09741	9.18929e-06	0.00021374
LOC_Os10g01470	Similar to Homeobox-leucine zipper protein HOX15.	HAT14	homeobox from Arabidopsis thaliana \\ Homeobox-leucine zipper protein. \\ homeobox from Arabidopsis thaliana (HAT14); FUNCTIONS IN: DNA binding, sequence-specific DNA binding transcription factor activity; INVOLVED IN: regulation of transcription, DNA-dependent, regulation of transcription; LOCATED IN: nucleus; EXPRESSED IN: 18 plant structures; EXPRESSED DURING: 9 growth stages; CONTAINS InterPr…	28.1967	58.2482	2.06578	1.04668	0.00083161	0.00884228	19.7725	70.4321	3.56213	1.83274	8.86682e-11	6.02654e-09
LOC_Os01g07990	Cytochrome P450 domain containing protein.	ATCG00350.1	Photosystem I, PsaA/PsaB protein \\ Encodes psaA protein comprising the reaction center for photosystem I along with psaB protein; hydrophobic protein encoded by the chloroplast genome. \\ PSAA; FUNCTIONS IN: chlorophyll binding; INVOLVED IN: photosynthesis; LOCATED IN: in 6 components; EXPRESSED IN: 24 plant structures; EXPRESSED DURING: 13 growth stages; CONTAINS InterPro DOMAIN/s: Photosystem …	4.86189	70.8075	14.5638	3.86431	9.35841e-14	1.10499e-11	13.1677	69.4555	5.27469	2.39909	2.22967e-10	1.44294e-08
LOC_Os04g54980				1.45632	64.9553	44.6023	5.47905	1.73693e-21	4.69648e-19	2.95497	67.7369	22.923	4.51873	2.66463e-26	7.83487e-24
LOC_Os06g42470	Conserved hypothetical protein.			21.3843	53.1559	2.48574	1.31368	8.08236e-05	0.00136077	24.0304	67.0394	2.78977	1.48015	1.13372e-07	4.27134e-06
LOC_Os03g10710	Non-protein coding transcript.			24.307	68.7278	2.82749	1.49952	1.13729e-06	3.73194e-05	21.0737	66.4977	3.15548	1.65786	1.74375e-09	9.64623e-08
LOC_Os03g05630	Hypothetical conserved gene.			17.9763	60.2913	3.35394	1.74586	1.26428e-07	5.33305e-06	28.6467	66.419	2.31856	1.21323	4.648e-06	0.00011599
LOC_Os03g54030		AT3G30680	transposable element gene \\ CACTA-like transposase family (Tnp2/En/Spm), has a 2.3e-152 P-value blast match to GB:CAA40555 TNP2 (CACTA-element) (Antirrhinum majus)	30.1323	66.9363	2.22142	1.15148	0.00236532	0.0200113	26.3383	65.7657	2.49696	1.32017	8.01581e-05	0.00137849
LOC_Os01g52470	Similar to Elongation factor EF-2 (Fragment).	LOS1	Ribosomal protein S5/Elongation factor G/III/V family protein \\ encodes a translation elongation factor 2-like protein that is involved in cold-induced translation. Mutations in this gene specifically blocks low temperature-induced transcription of cold-responsive genes but induces the expression of CBF genes and mutants carrying the recessive mutations fail to acclimate to cold and is freezing …	8.26497	55.9217	6.76611	2.75833	4.84474e-12	4.78091e-10	13.838	65.4355	4.72867	2.24143	4.12527e-13	3.86134e-11
LOC_Os02g17930				0.48544	47.8877	98.6479	6.62422	3.75326e-08	1.79937e-06	17.1262	64.1065	3.74318	1.90426	0.00252438	0.023
LOC_Os10g26490				0	56.5947	Inf	20	1.12512e-14	1.49128e-12	5.25811	64.0819	12.1872	3.6073	8.12131e-12	6.44251e-10
LOC_Os04g29450		AT5G29646	transposable element gene \\ CACTA-like transposase family (Tnp2/En/Spm), has a 1.9e-233 P-value blast match to gb|AAG52024.1|AC022456_5 Tam1-homologous transposon protein TNP2, putative; 12762-16371 (Arabidopsis thaliana) (CACTA-element)	24.3057	61.2181	2.51867	1.33266	0.00120234	0.0118606	23.3547	63.3777	2.71371	1.44026	5.79093e-05	0.00104364
LOC_Os02g52930	Protein of unknown function DUF6, transmembrane domain containing protein.	AT1G21890	nodulin MtN21 /EamA-like transporter family protein \\ nodulin MtN21 /EamA-like transporter family protein; LOCATED IN: membrane; EXPRESSED IN: inflorescence meristem, flower; EXPRESSED DURING: petal differentiation and expansion stage; CONTAINS InterPro DOMAIN/s: Protein of unknown function DUF6, transmembrane (InterPro:IPR000620); BEST Arabidopsis thaliana protein match is: nodulin MtN21 /EamA-…	2.4297	59.9029	24.6544	4.62378	1.93596e-16	3.14991e-14	4.94003	62.3858	12.6286	3.65862	2.19998e-18	3.65102e-16
LOC_Os10g01134	Peptidase S10, serine carboxypeptidase family protein.	scpl6	serine carboxypeptidase-like 6 \\ serine carboxypeptidase-like 6 (scpl6); FUNCTIONS IN: serine-type carboxypeptidase activity; INVOLVED IN: proteolysis; LOCATED IN: endomembrane system; EXPRESSED IN: root; CONTAINS InterPro DOMAIN/s: Peptidase S10, serine carboxypeptidase (InterPro:IPR001563); BEST Arabidopsis thaliana protein match is: serine carboxypeptidase-like 3 (TAIR:AT1G73280.1); Has 3982 …	31.5911	72.7388	2.30251	1.20321	3.26015e-05	0.000631908	28.3297	62.0429	2.19003	1.13095	1.49719e-05	0.000327408
LOC_Os11g30360	Similar to AT.I.24-5 protein (Fragment).	AT5G63500	Protein of unknown function (DUF 3339) \\ Protein of unknown function (DUF 3339); CONTAINS InterPro DOMAIN/s: Protein of unknown function DUF3339 (InterPro:IPR021775); BEST Arabidopsis thaliana protein match is: Protein of unknown function (DUF 3339) (TAIR:AT3G48660.1); Has 274 Blast hits to 269 proteins in 15 species: Archae - 0; Bacteria - 0; Metazoa - 0; Fungi - 0; Plants - 274; Viruses - 0; O…	16.0433	43.4502	2.70832	1.4374	6.88771e-05	0.00119459	27.0034	60.788	2.25112	1.17064	3.09989e-05	0.00061636
LOC_Os03g51620	Protein of unknown function DUF221 domain containing protein.	RXW8	lipases;hydrolases, acting on ester bonds \\ RXW8; LOCATED IN: endomembrane system, membrane; CONTAINS InterPro DOMAIN/s: Protein of unknown function DUF221 (InterPro:IPR003864); BEST Arabidopsis thaliana protein match is: Early-responsive to dehydration stress protein (ERD4) (TAIR:AT1G10090.1); Has 30201 Blast hits to 17322 proteins in 780 species: Archae - 12; Bacteria - 1396; Metazoa - 17338; …	2.91639	52.8244	18.113	4.17895	4.37781e-12	4.35189e-10	5.27555	60.3342	11.4366	3.51558	1.83277e-14	2.13357e-12
LOC_Os02g22100	Peptidase S54, rhomboid domain containing protein.	AT5G38510	Rhomboid-related intramembrane serine protease family protein \\ Rhomboid-related intramembrane serine protease family protein; FUNCTIONS IN: serine-type endopeptidase activity; INVOLVED IN: biological_process unknown; LOCATED IN: integral to membrane; EXPRESSED IN: 22 plant structures; EXPRESSED DURING: 13 growth stages; CONTAINS InterPro DOMAIN/s: Peptidase S54, rhomboid (InterPro:IPR002610); B…	29.6456	60.9487	2.05591	1.03978	0.00434303	0.0318328	26.9994	60.0234	2.22313	1.1526	0.000328706	0.00450675
LOC_Os03g47620	Similar to TPR Domain containing protein.	AT3G04710	ankyrin repeat family protein \\ ankyrin repeat family protein; FUNCTIONS IN: binding; INVOLVED IN: biological_process unknown; LOCATED IN: cellular_component unknown; EXPRESSED IN: 22 plant structures; EXPRESSED DURING: 14 growth stages; CONTAINS InterPro DOMAIN/s: Tetratricopeptide-like helical (InterPro:IPR011990), Ankyrin repeat-containing domain (InterPro:IPR020683), Tetratricopeptide repeat…	4.8594	86.8657	17.8758	4.15994	1.86067e-07	7.46451e-06	2.30778	59.841	25.9301	4.69656	1.58151e-10	1.04091e-08
LOC_Os11g35425	Ribosome-inactivating protein domain containing protein.			3.40557	77.4902	22.7539	4.50804	7.87795e-23	2.50602e-20	2.31076	59.8053	25.8813	4.69384	2.10999e-27	6.71499e-25
LOC_Os04g57060		AT2G05040	transposable element gene \\ gypsy-like retrotransposon family, has a 6.6e-200 P-value blast match to GB:AAD22153 polyprotein (Gypsy_Ty3-element) (Sorghum bicolor)	19.4401	53.9228	2.77379	1.47186	1.18177e-05	0.000268295	27.6781	59.1413	2.13676	1.09542	7.01009e-05	0.0012386
LOC_Os04g33570	Similar to Terminal flower 1-like protein.	ATC	centroradialis \\ encodes a protein similar to TFL1. overexpression leads to similar phenotype as TFL1 overexpression. expressed specifically in the hypocotyl and null mutation does not result in phenotypes exhibited by TFL1 null mutations. \\ centroradialis (ATC); CONTAINS InterPro DOMAIN/s: Phosphatidylethanolamine-binding, conserved site (InterPro:IPR001858), Phosphatidylethanolamine-binding p…	22.3527	54.4951	2.43796	1.28568	8.50558e-05	0.00142052	25.9951	58.7639	2.26058	1.17669	2.30326e-05	0.000478904
[truncated: 169 more rows]

## Sheet: Table S7
AccID	Description	Blast_Symbol	Blast_Description	osvil2_2 mm	WT_2mm	FoldChange	Log2FC	P-Value	FDR	WT_4mm	osvil2_4mm	FoldChange	Log2FC	P-Value	FDR
[truncated: 306 more rows]
